# Supplementary material for: Metal-free synthesis of triarylated (Z)-nitrones via H2O-mediated 1,3-dipolar transfer under aerobic conditions
Source: Royal Society of Chemistry journal article supplement (doi:10.1039/c8gc03593h), 2019-01-01
Supplement: c8gc03593h1.pdf [file c8gc03593h1.pdf]

## Supporting Information

# Metal-free synthesis of triarylated (*Z*)-nitrones via H<sub>2</sub>O-mediated 1,3-dipolar transfer under aerobic conditions

Ke Chen,<sup>a</sup> Wen-Juan Hao,<sup>a</sup> Shu-Jiang Tu,<sup>\*,a</sup> and Bo Jiang<sup>\*,a</sup>

<sup>a</sup>School of Chemistry and Materials Science, Jiangsu Key Laboratory of Green Synthetic Chemistry for Functional Materials Jiangsu Normal University, Xuzhou 221116, P. R. China; email: laotu@jsnu.edu.cn (S.J.T); jiangchem@jsnu.edu.cn (B.J.)

### Context

|                                                                                            |         |
|--------------------------------------------------------------------------------------------|---------|
| Copy of <sup>1</sup> H NMR Spectra for Byproduct <b>7</b> .....                            | S2      |
| Copies of <sup>1</sup> H and <sup>13</sup> C NMR Spectra for Compounds <b>3a-3dd</b> ..... | S3-S62  |
| Copies of <sup>1</sup> H and <sup>13</sup> C NMR Spectra for Compound <b>5a</b> .....      | S63-S64 |
| Copies of <sup>1</sup> H and <sup>13</sup> C NMR Spectra for Compound <b>6a</b> .....      | S65-S66 |

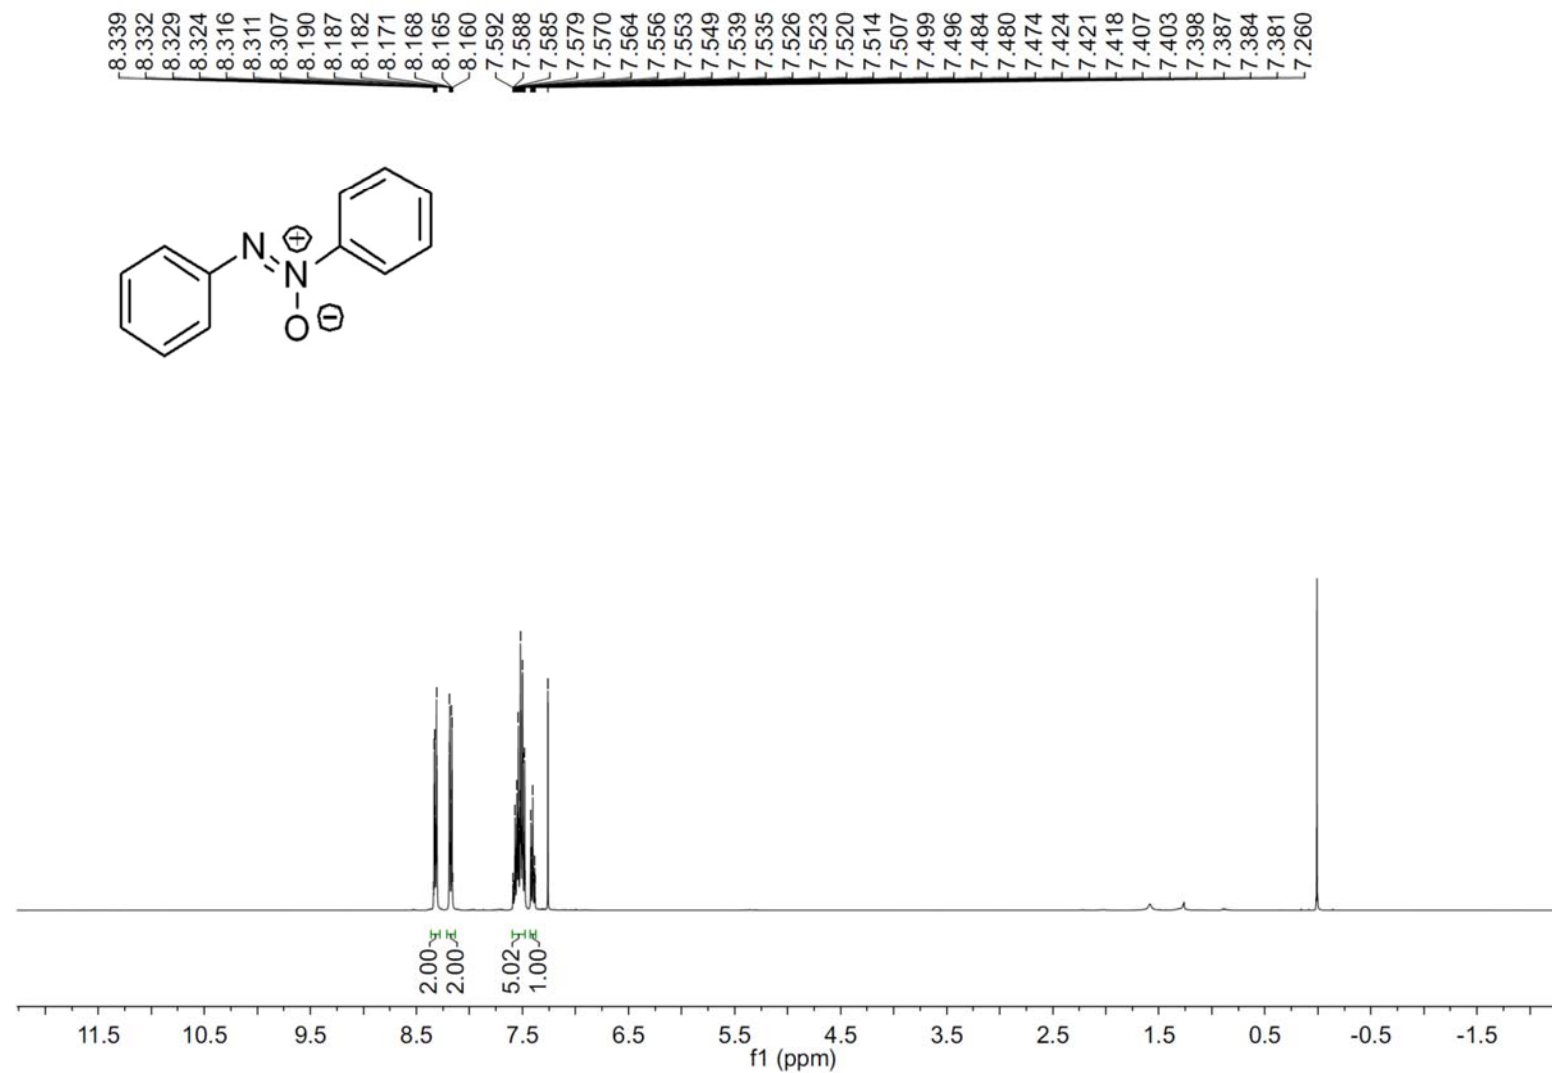

<sup>1</sup>H NMR Spectrum of Byproduct 7

Copies of  $^1\text{H}$  NMR and  $^{13}\text{C}$  NMR Spectrum of Compound 3

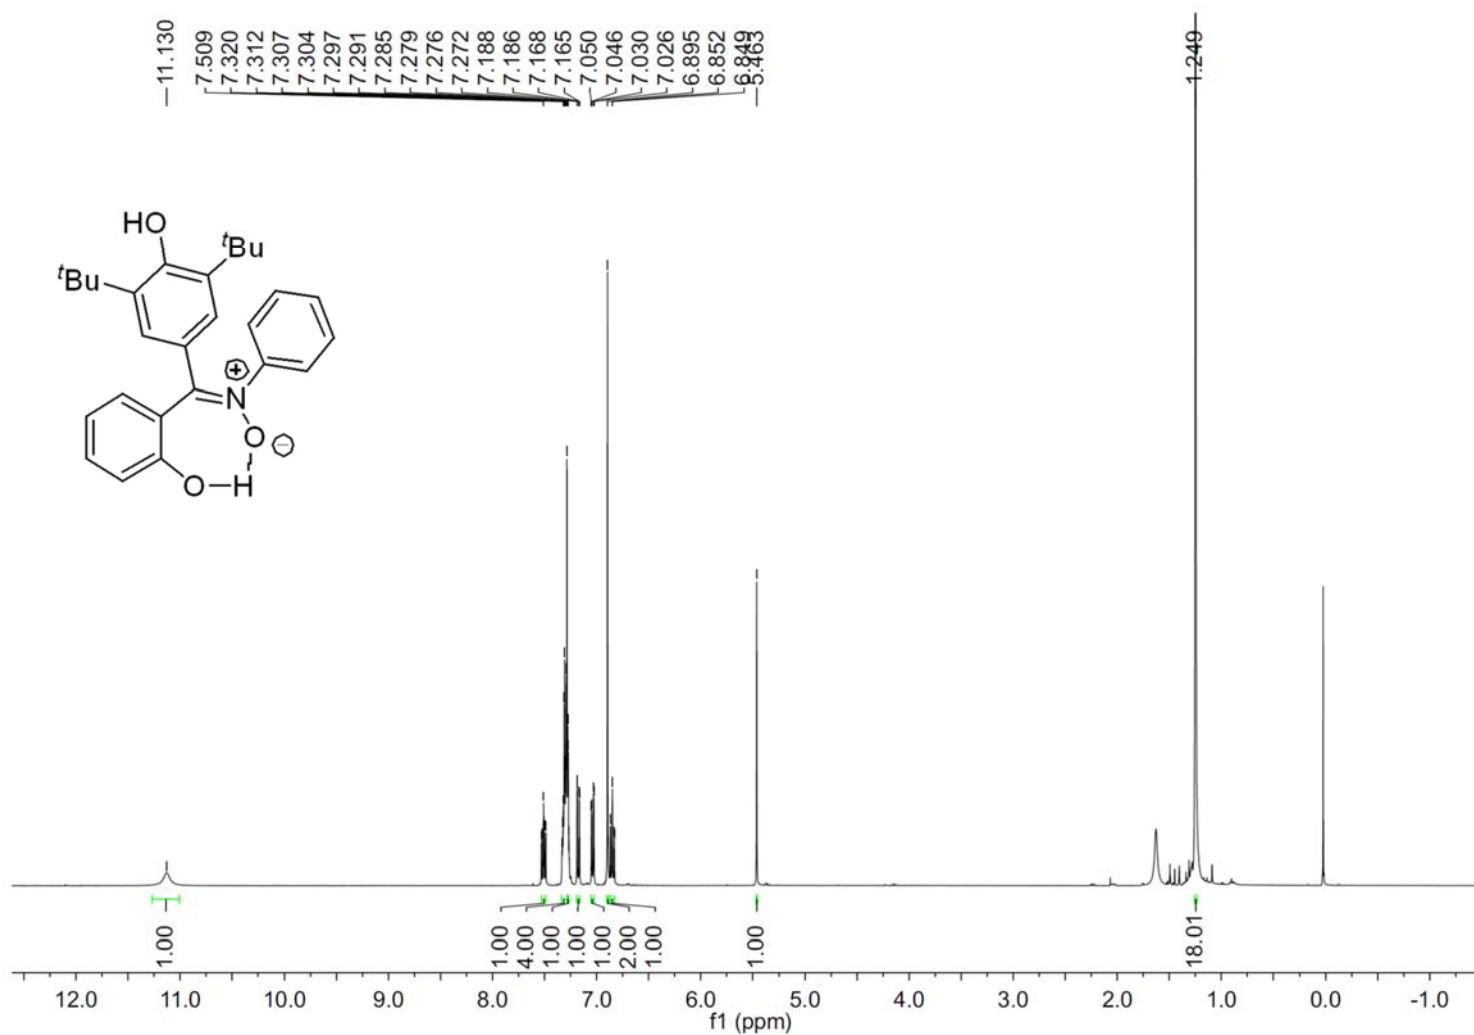

$^1\text{H}$  NMR Spectrum of Compound 3a

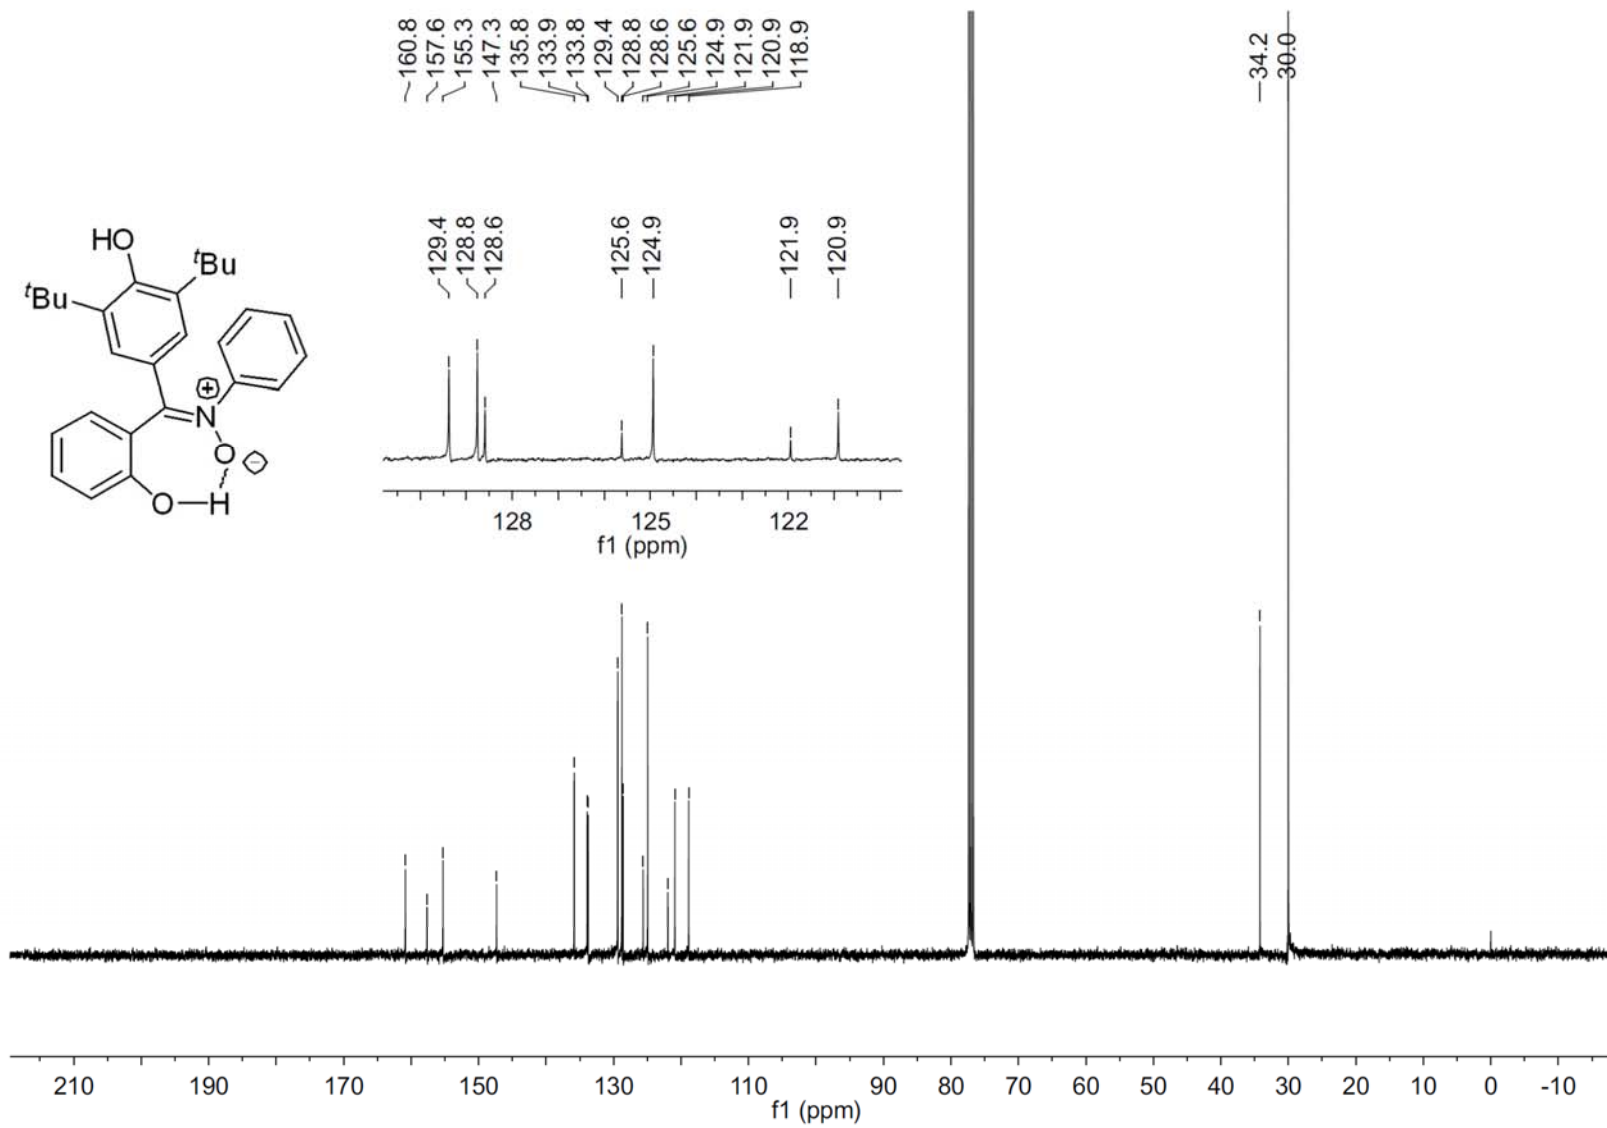

$^{13}\text{C}$  NMR Spectrum of Compound 3a

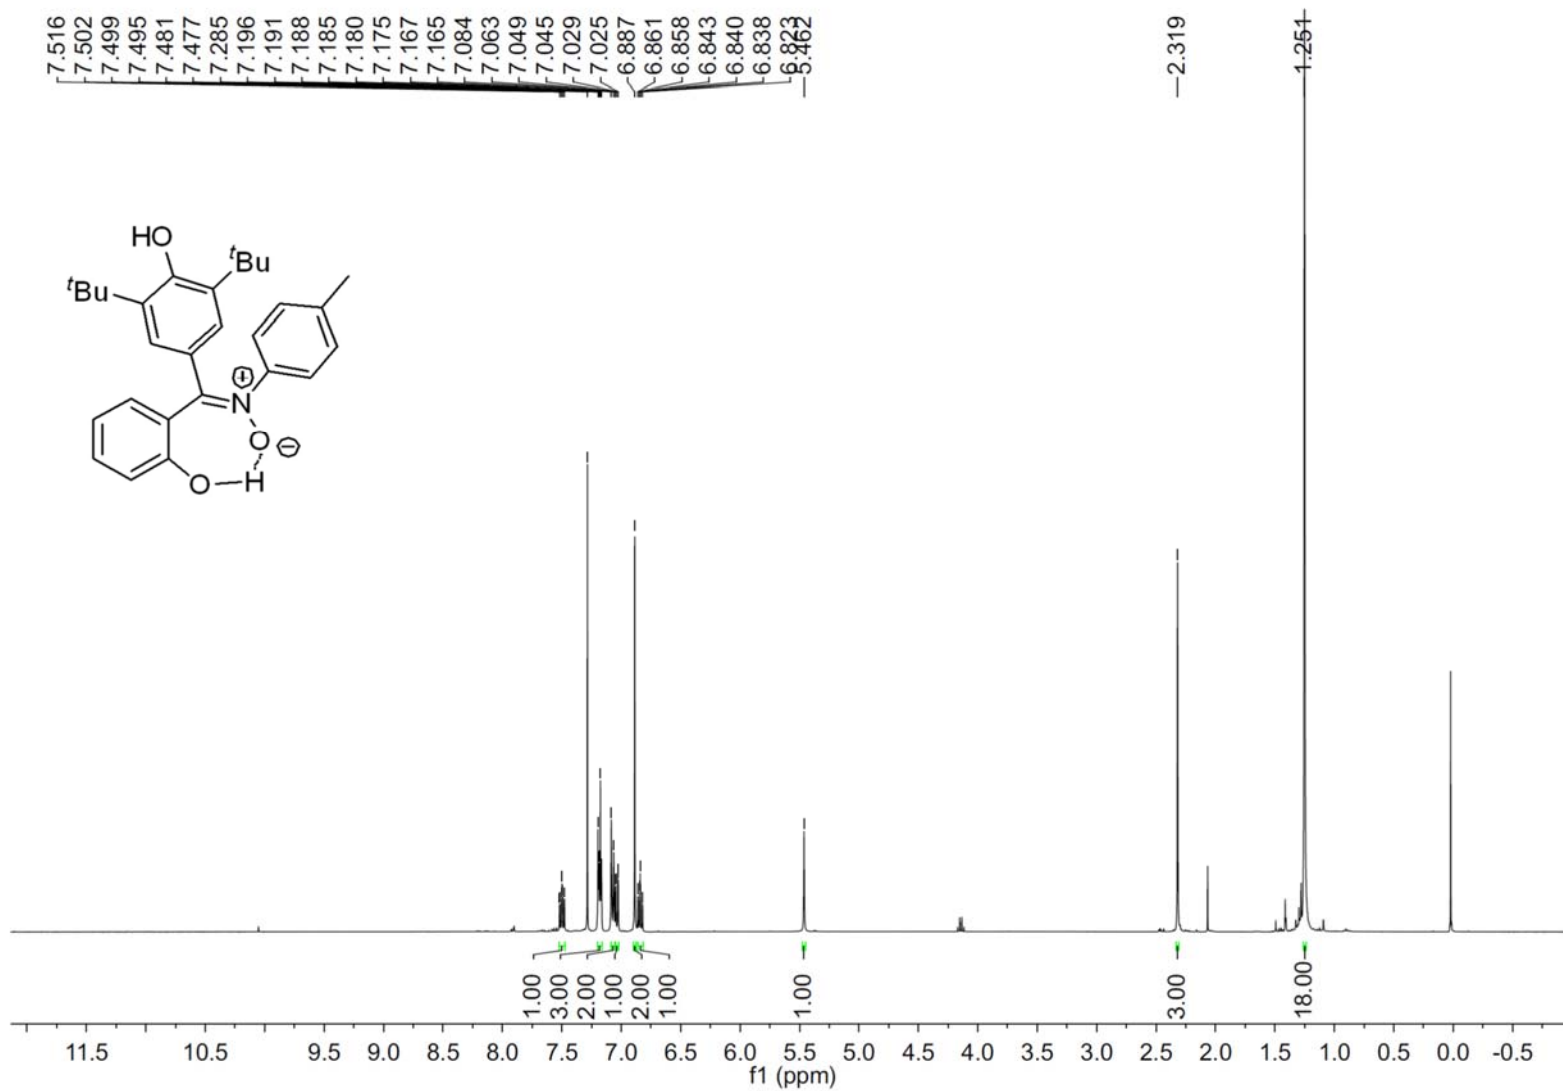

<sup>1</sup>H NMR Spectrum of Compound 3b

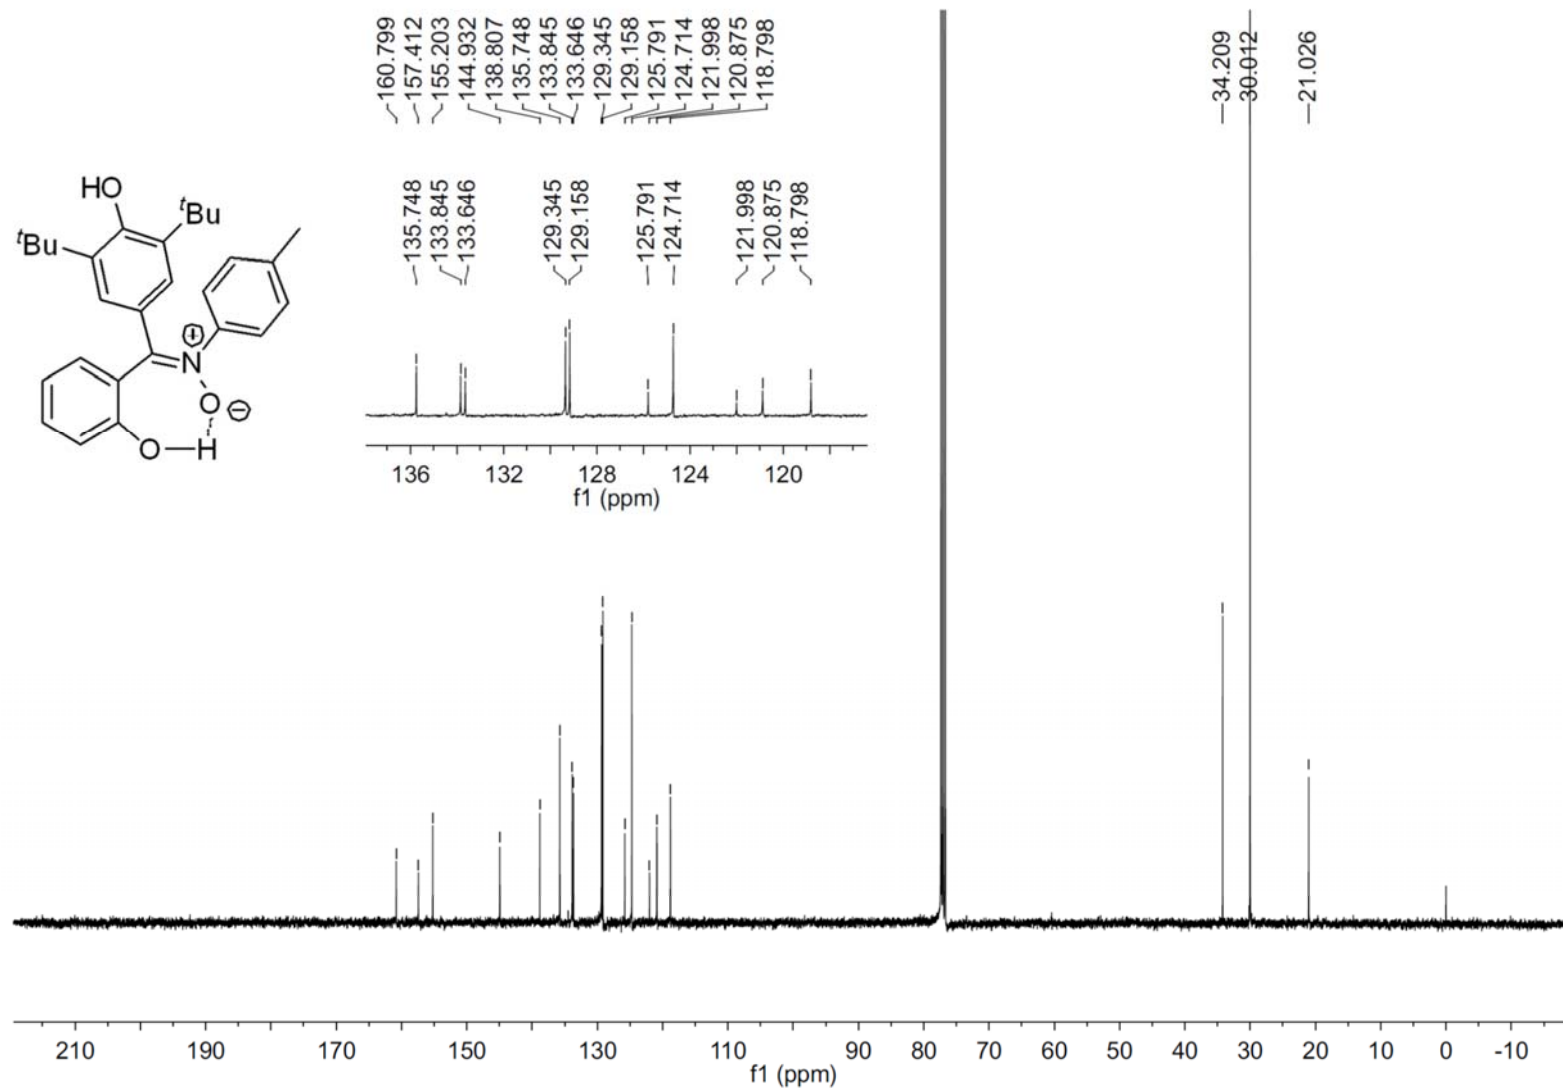

<sup>13</sup>C NMR Spectrum of Compound 3b

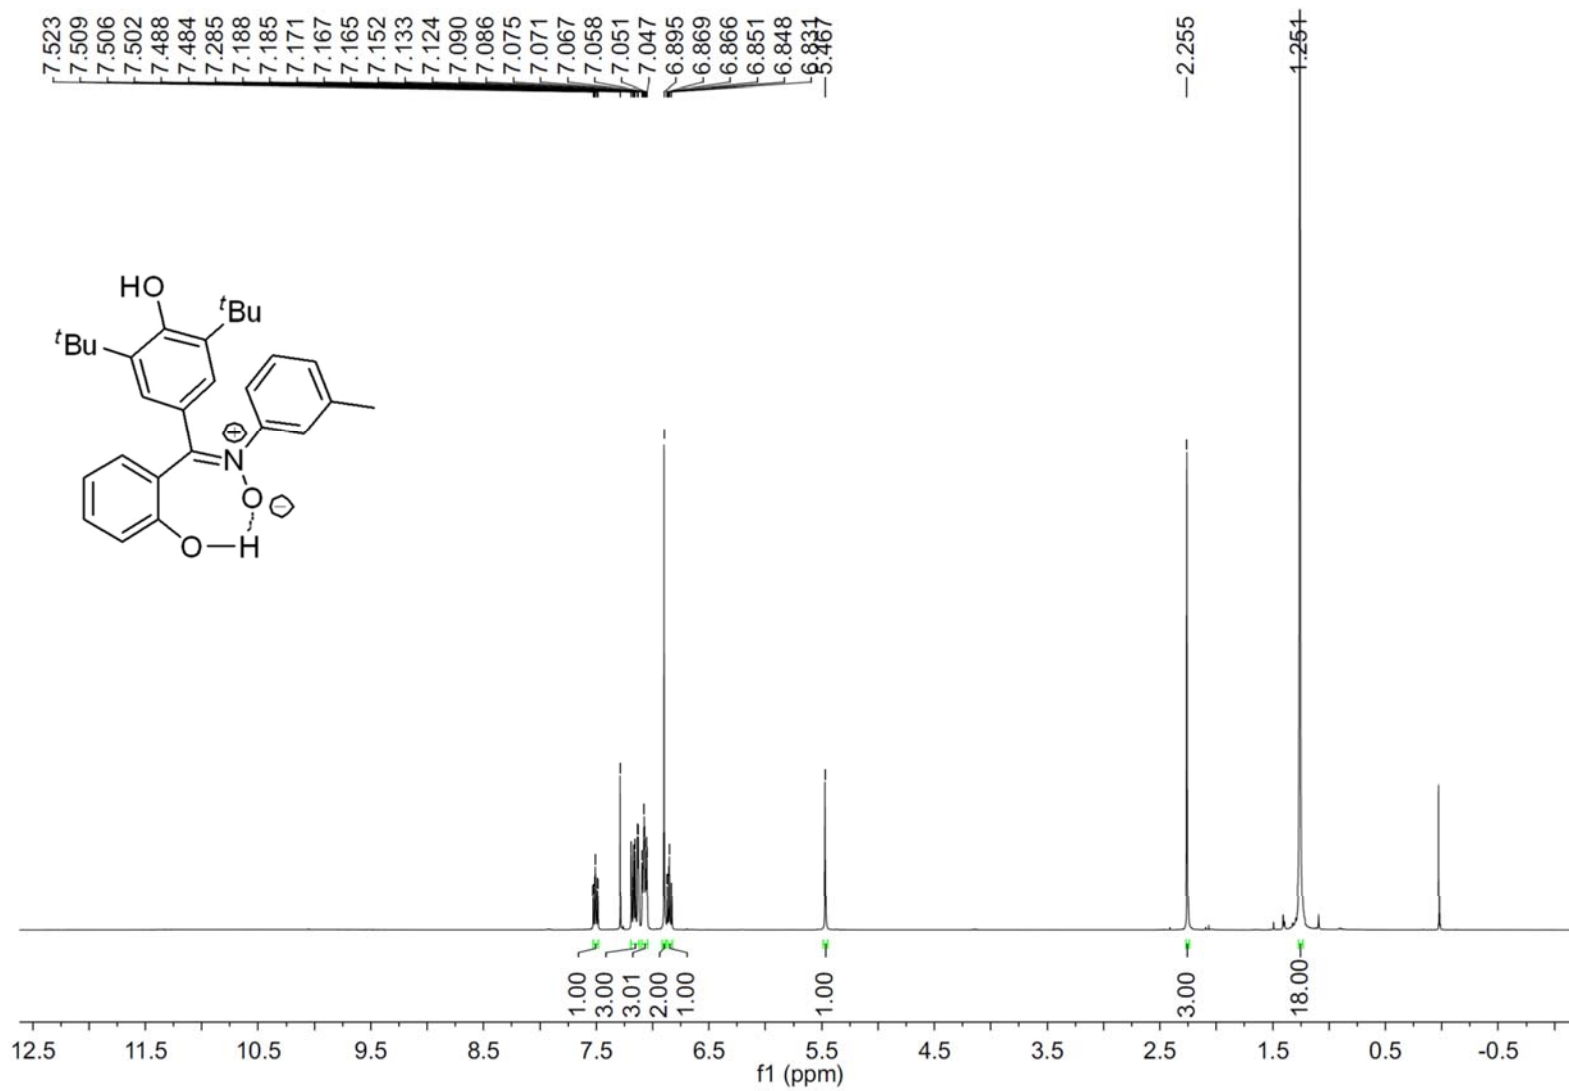

<sup>1</sup>H NMR Spectrum of Compound 3c

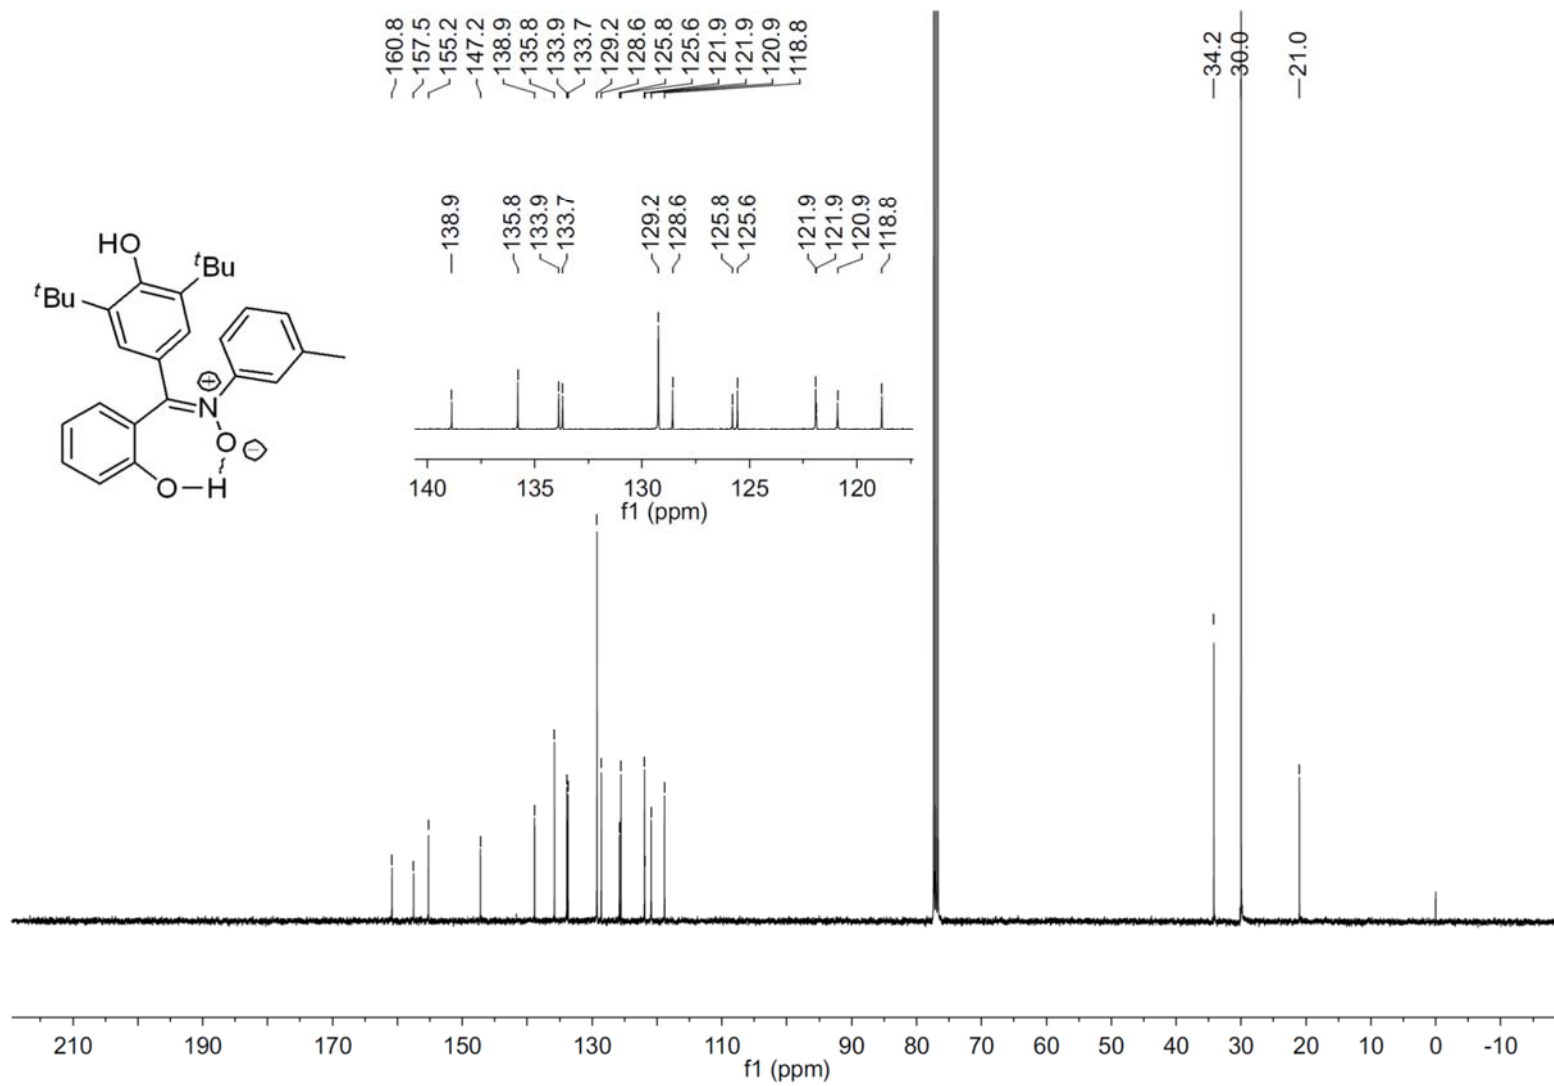

**<sup>13</sup>C NMR Spectrum of Compound 3c**



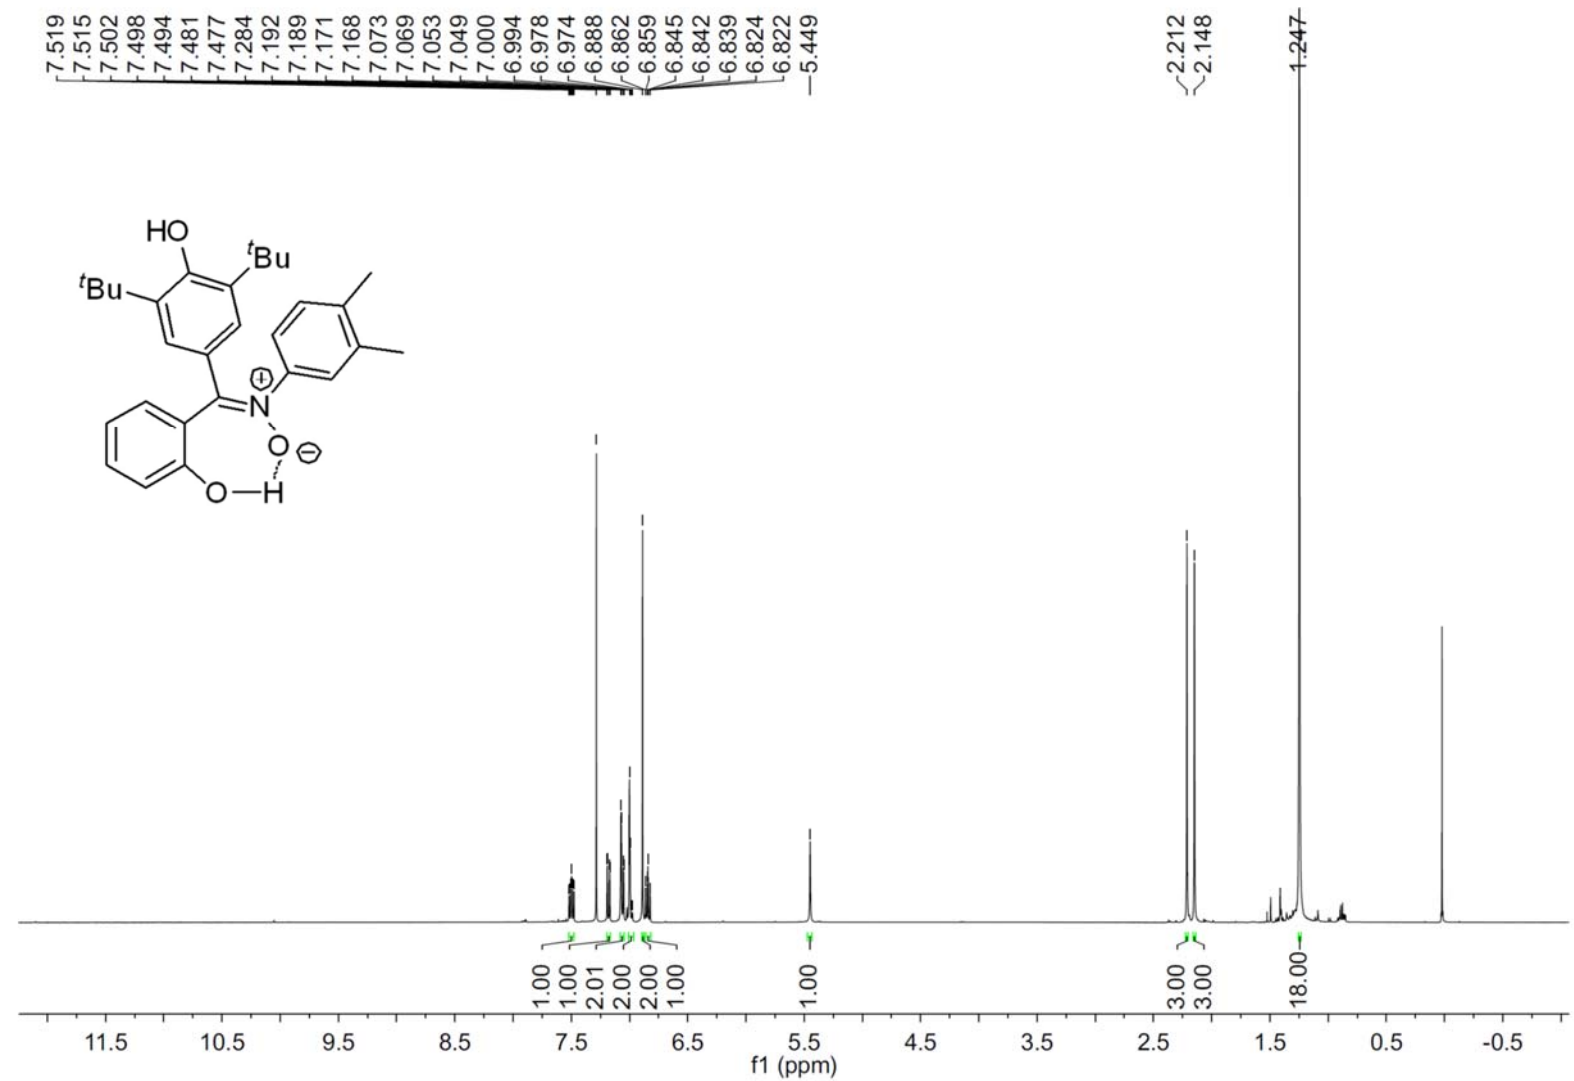

<sup>1</sup>H NMR Spectrum of Compound 3d

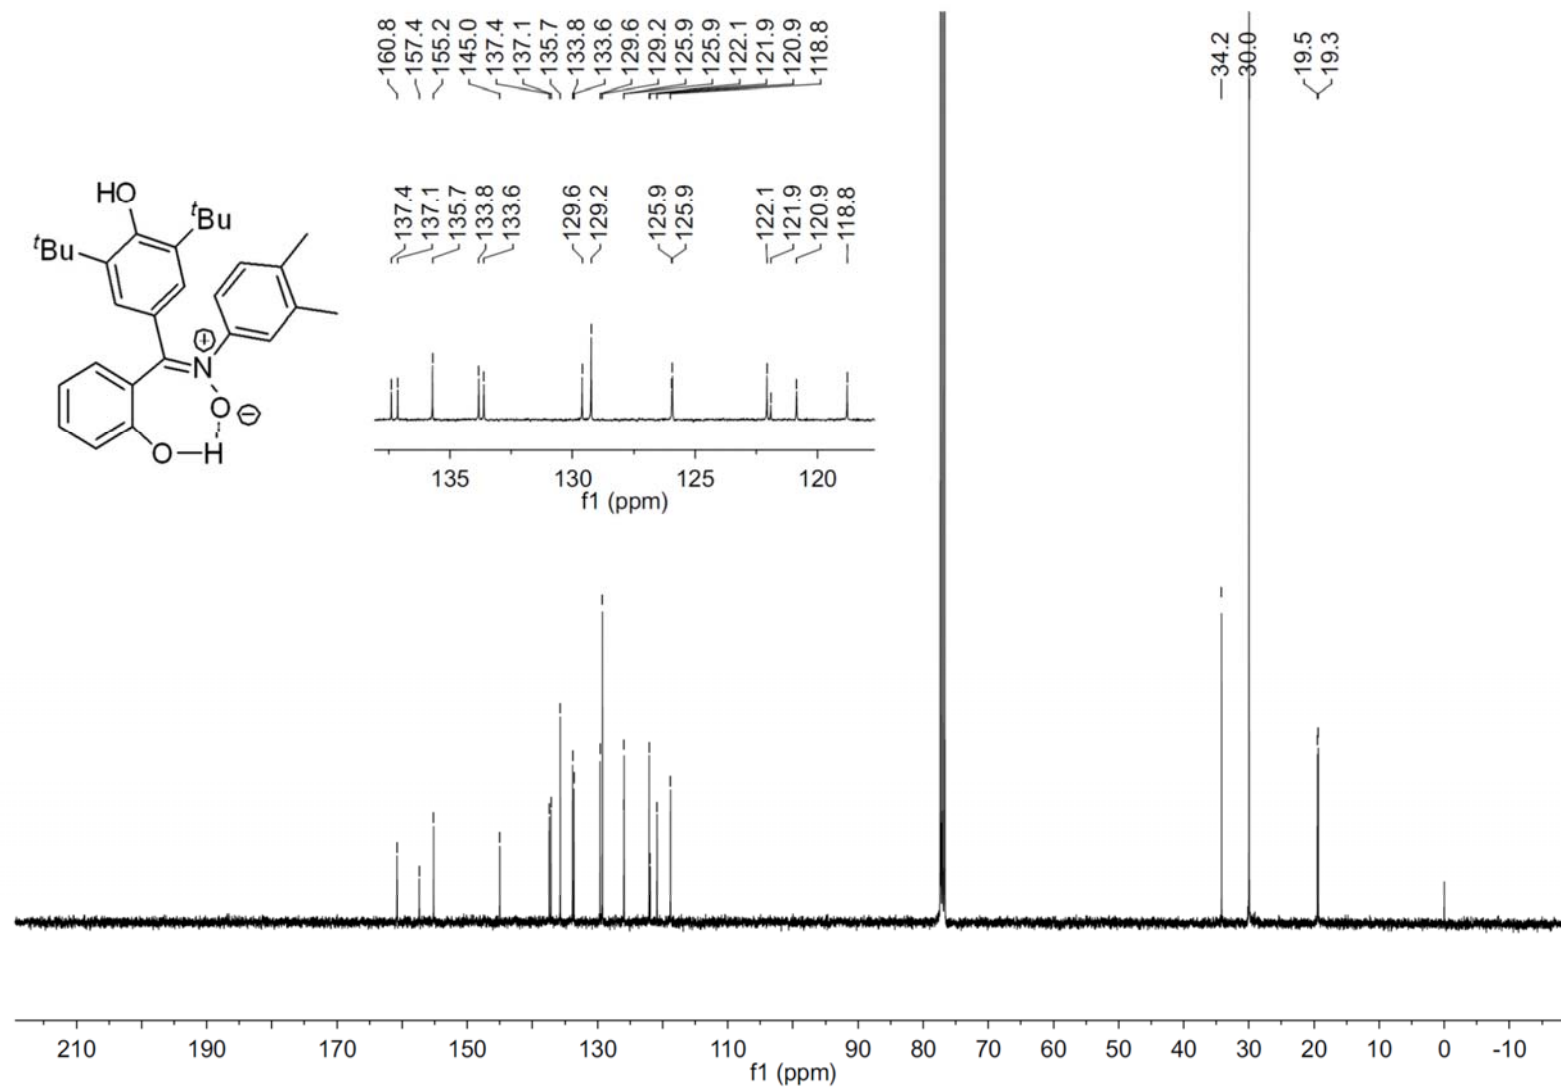

**<sup>13</sup>C NMR Spectrum of Compound 3d**

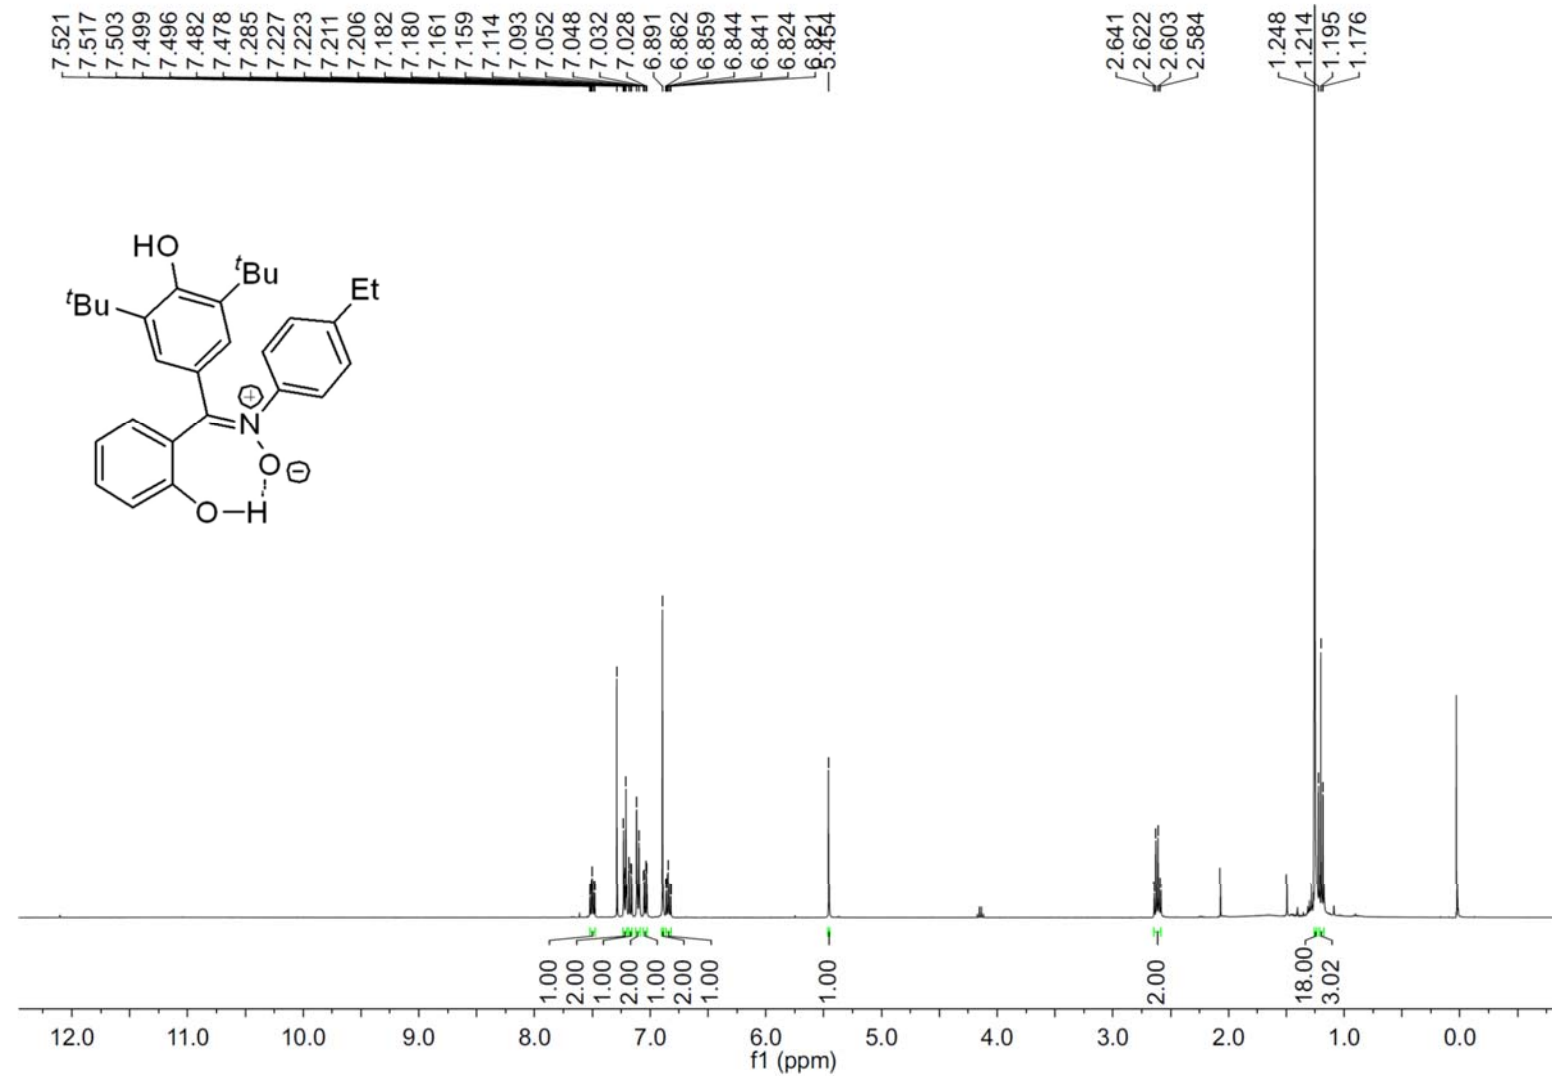

**<sup>1</sup>H NMR Spectrum of Compound 3e**

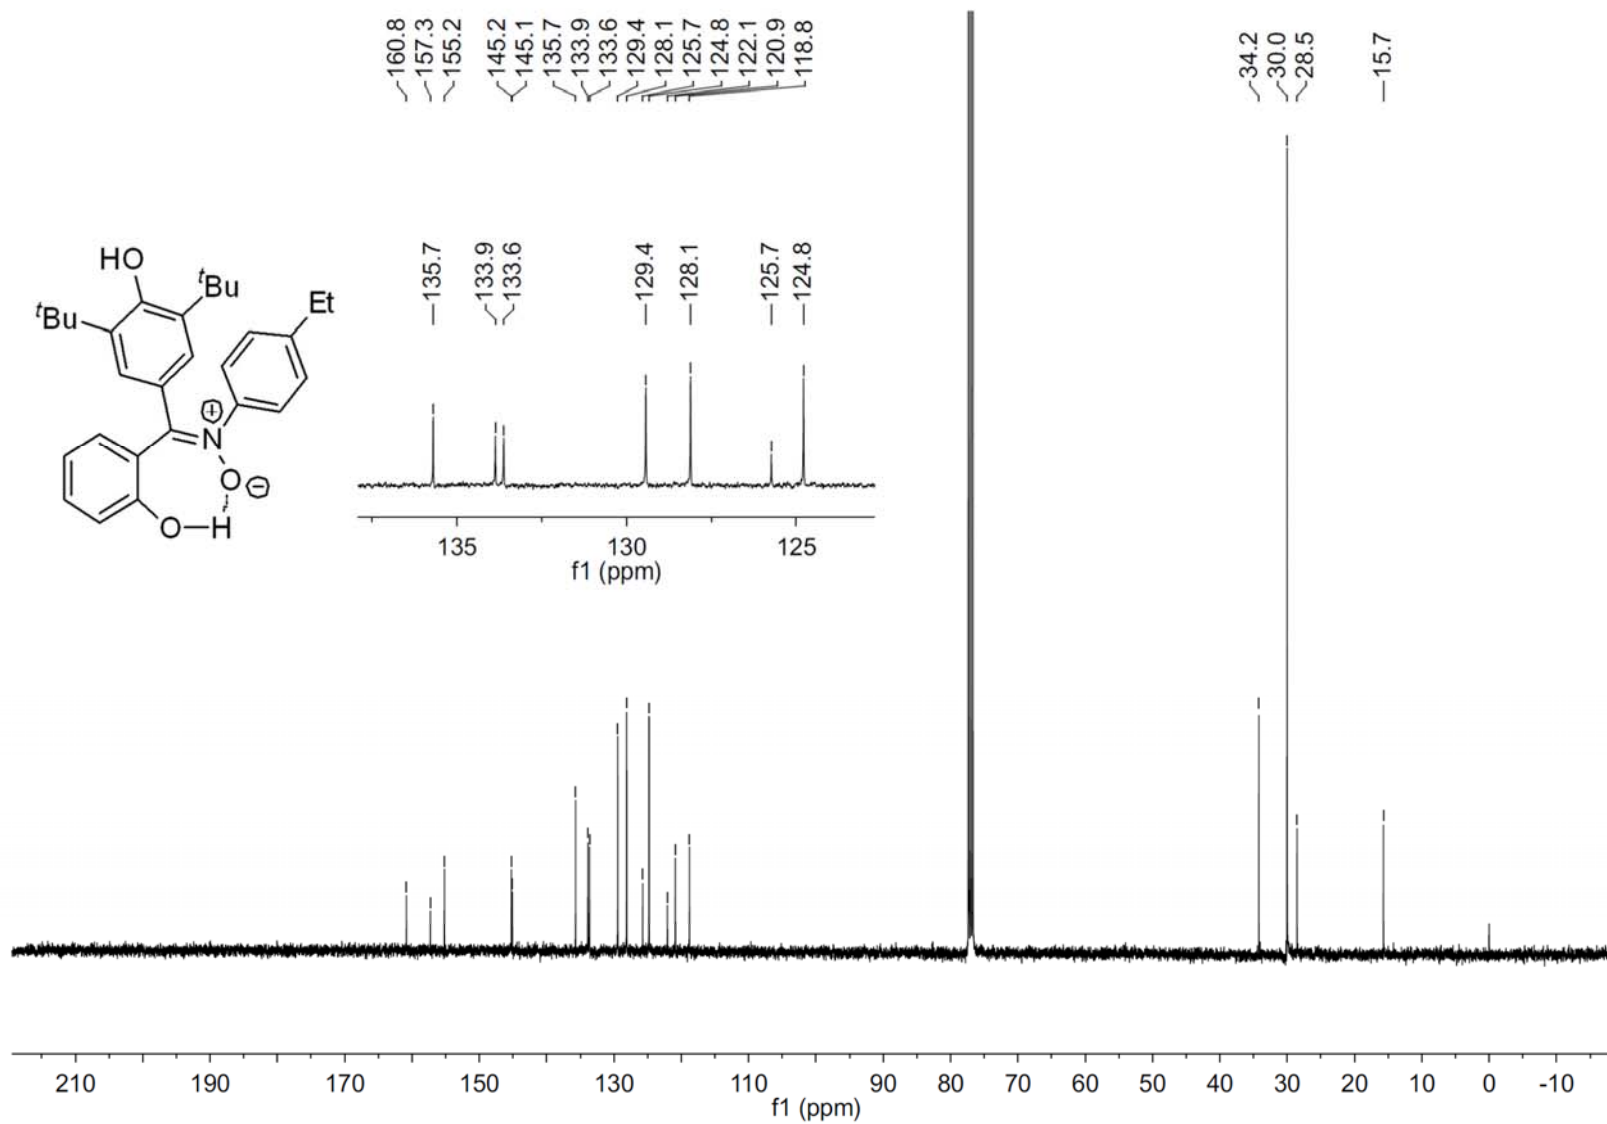

$^{13}\text{C}$  NMR Spectrum of Compound 3e

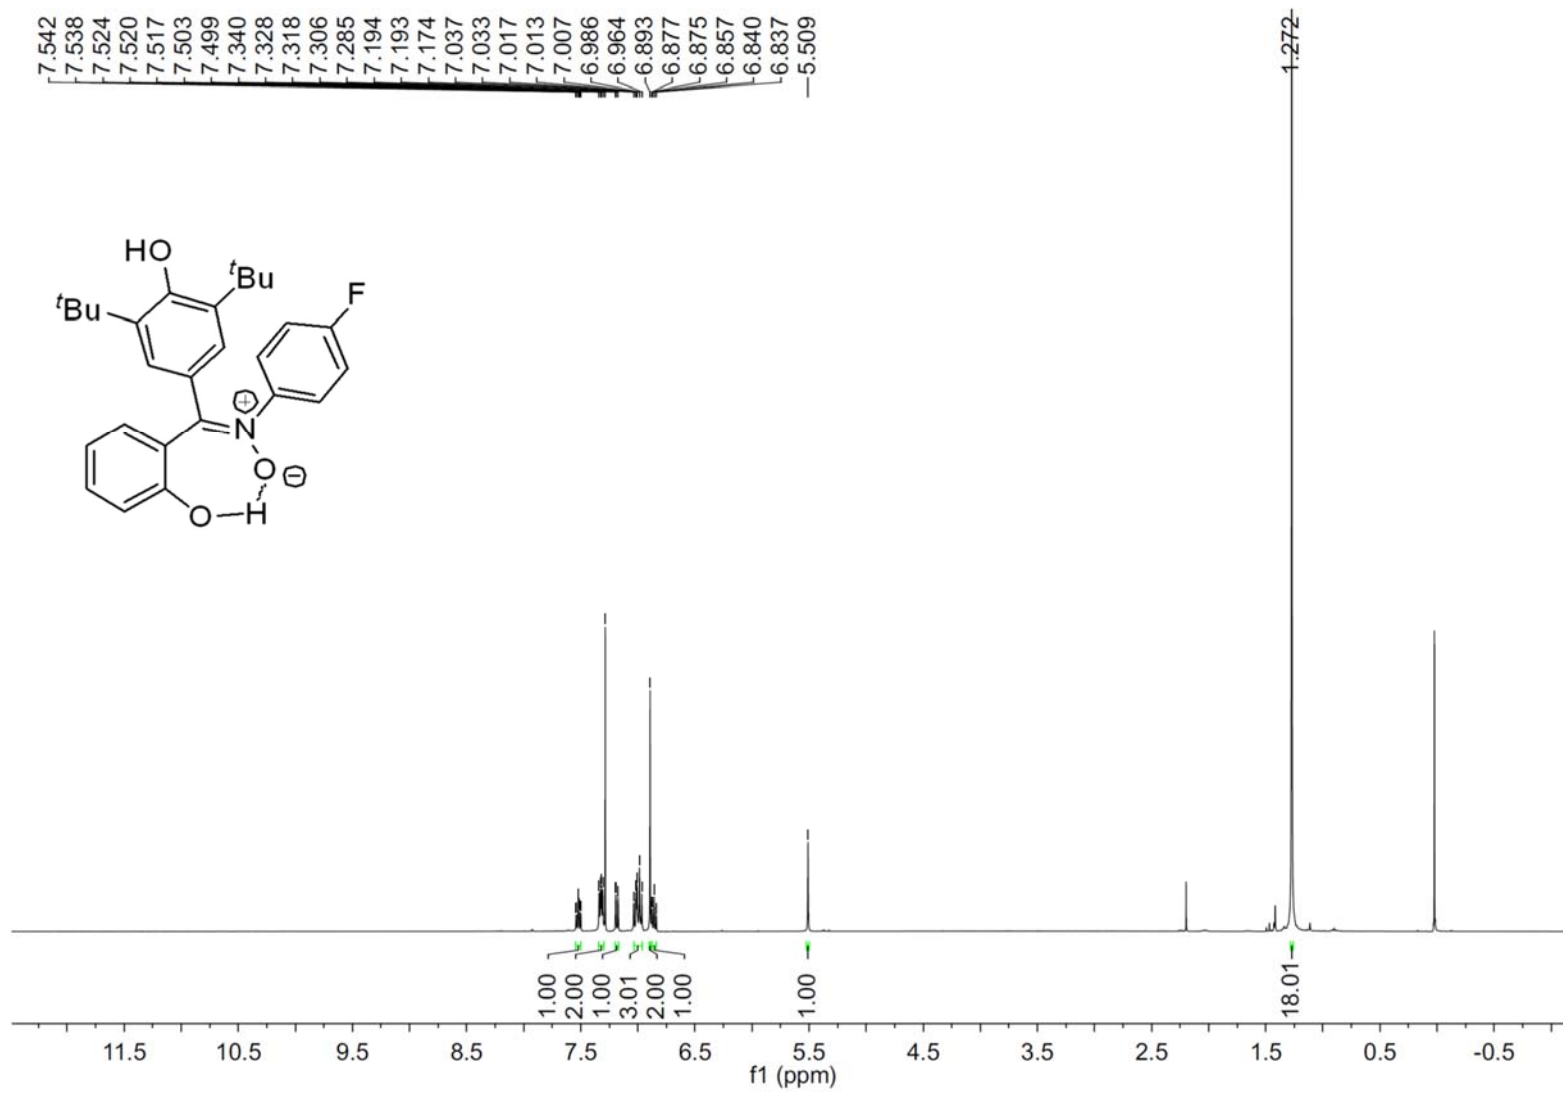

<sup>1</sup>H NMR Spectrum of Compound 3f

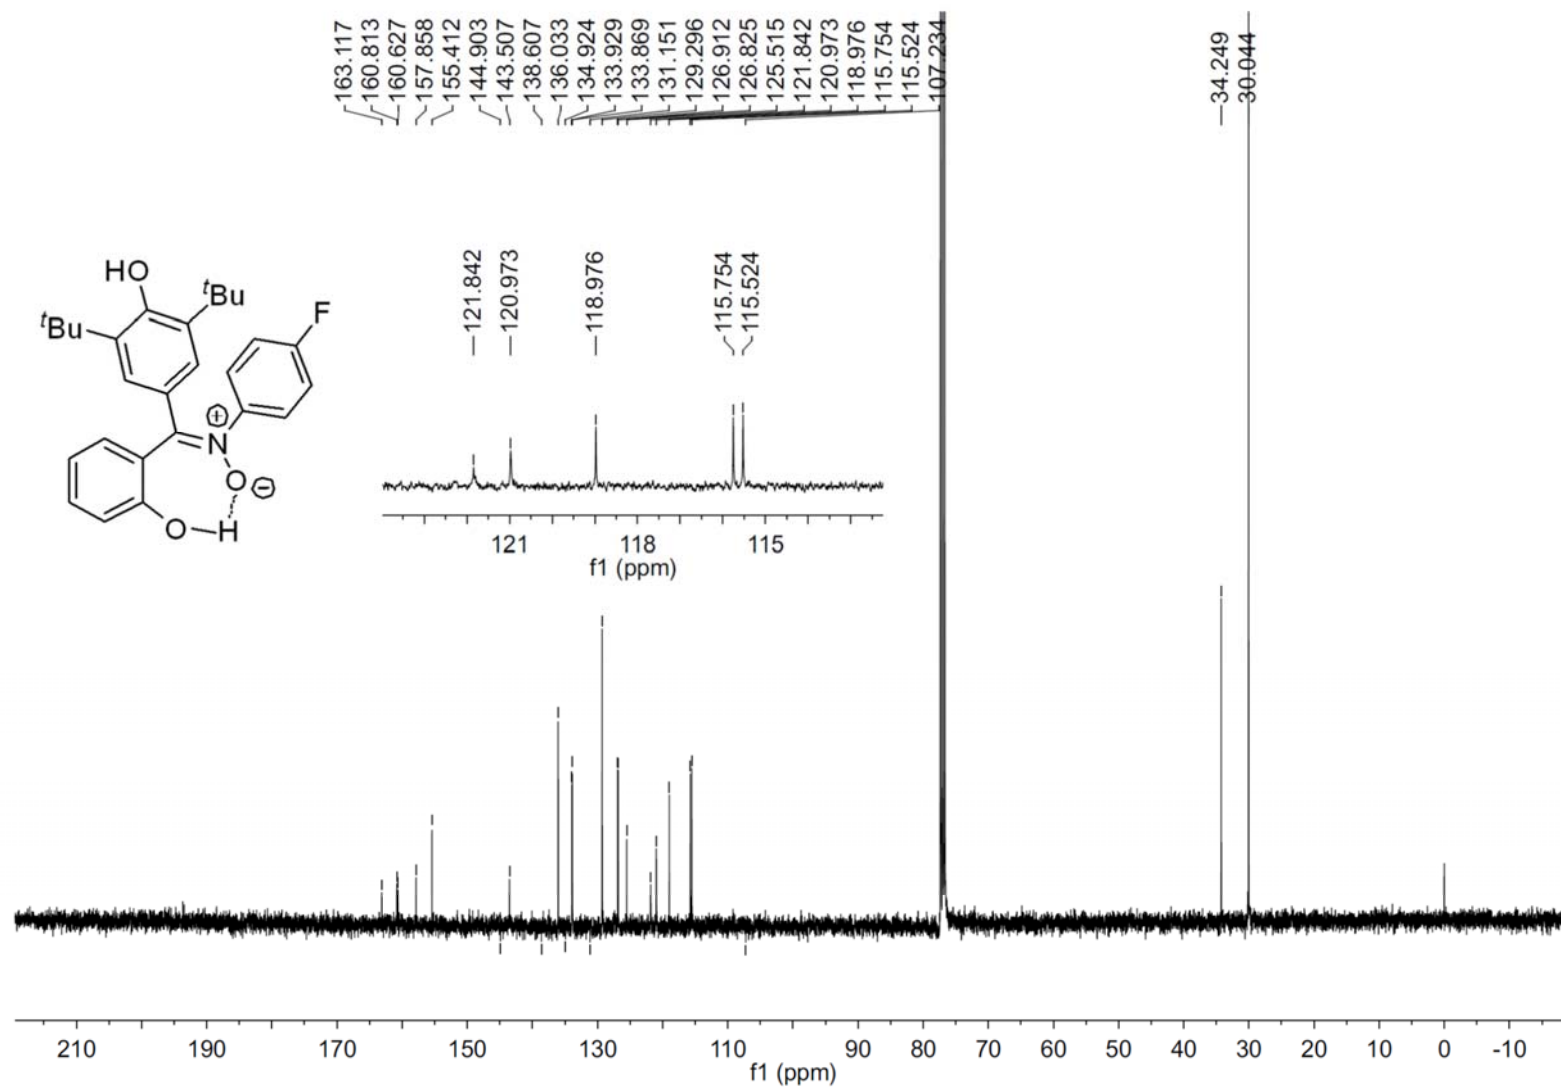

**<sup>13</sup>C NMR Spectrum of Compound 3f**

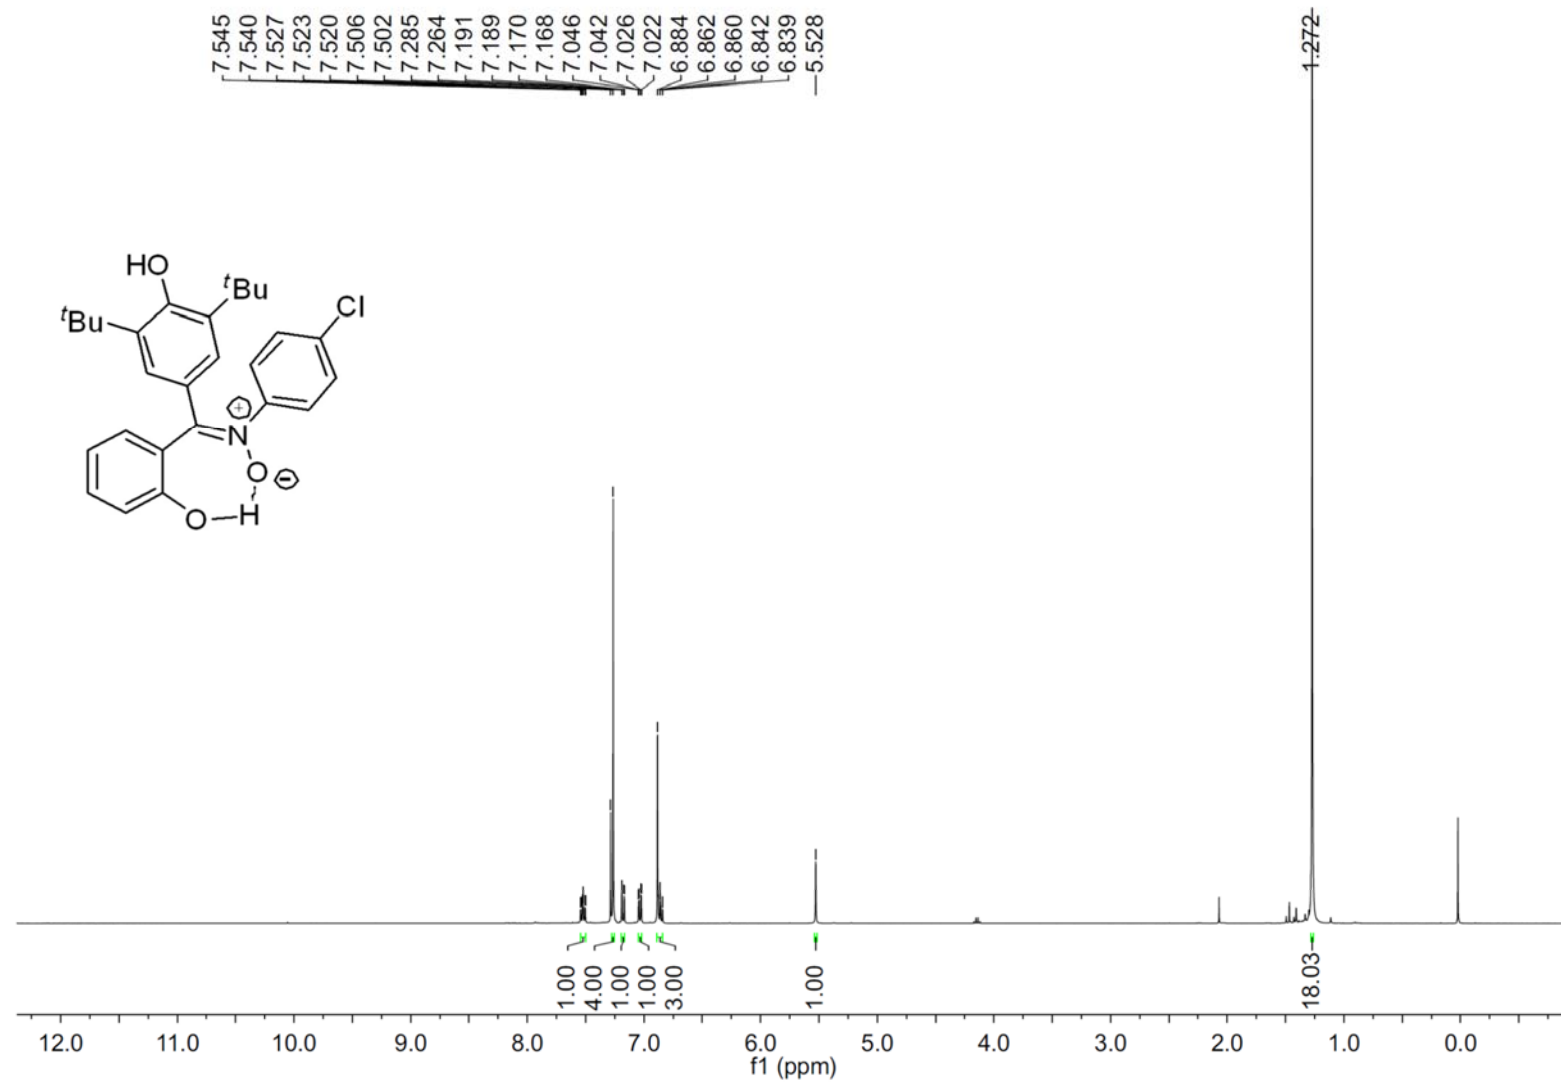

**<sup>1</sup>H NMR Spectrum of Compound 3g**

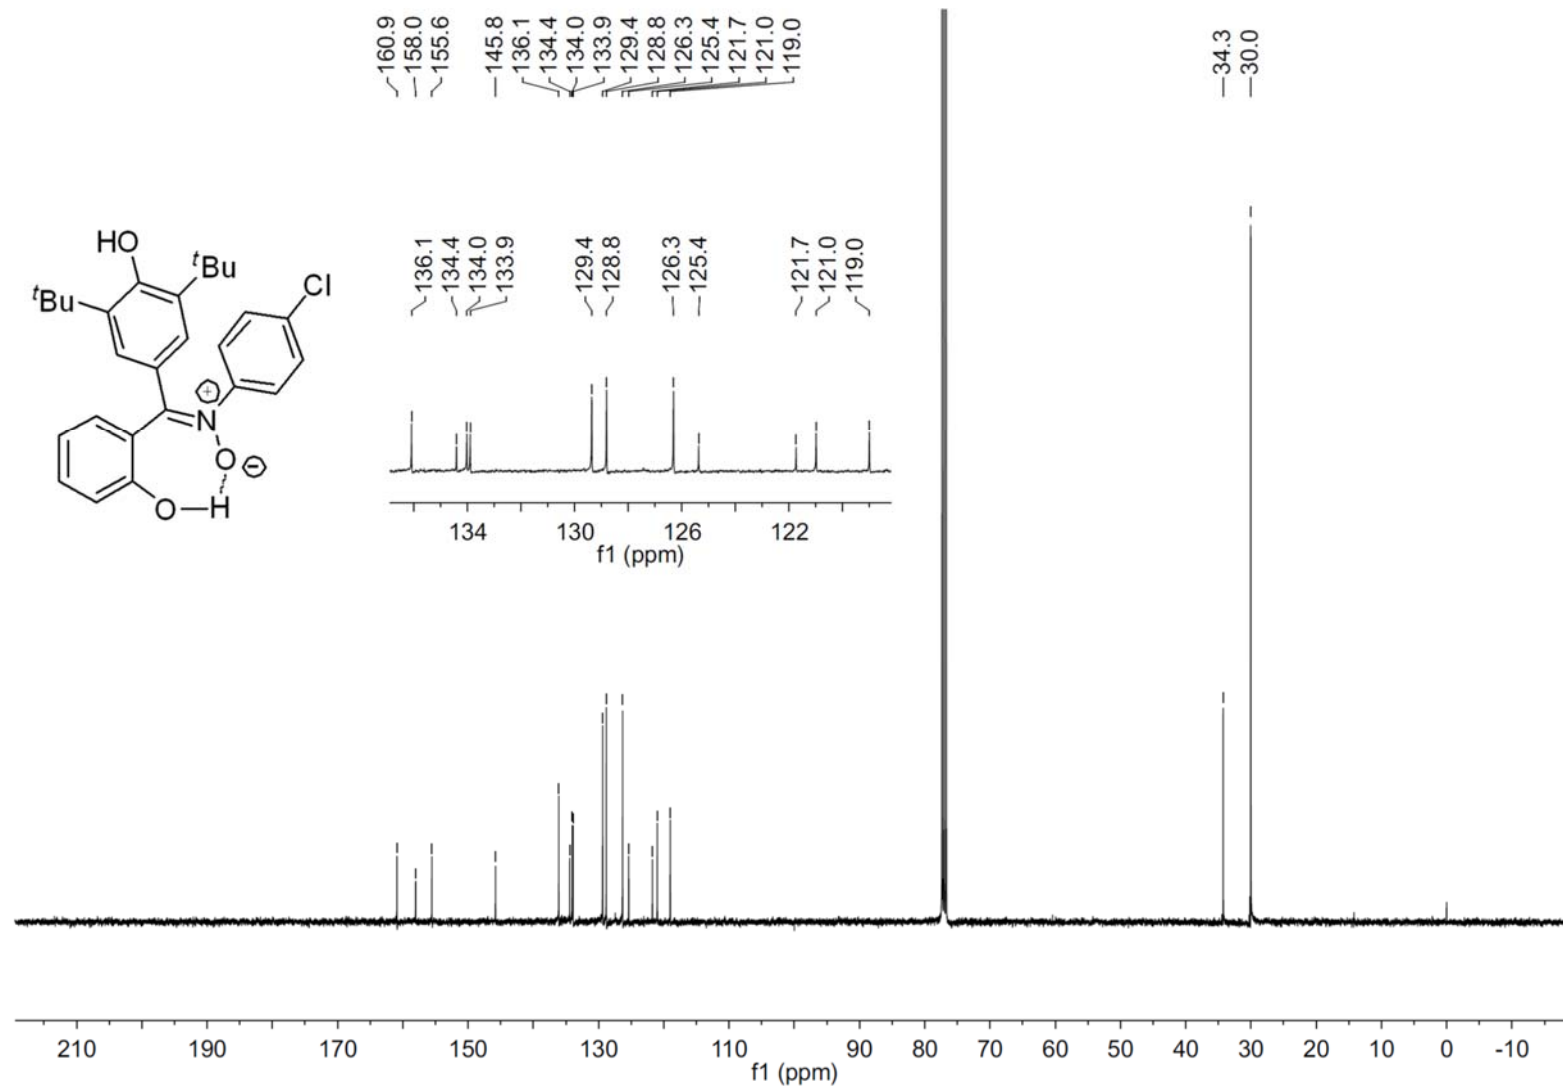

**<sup>1</sup>H NMR Spectrum of Compound 3g**



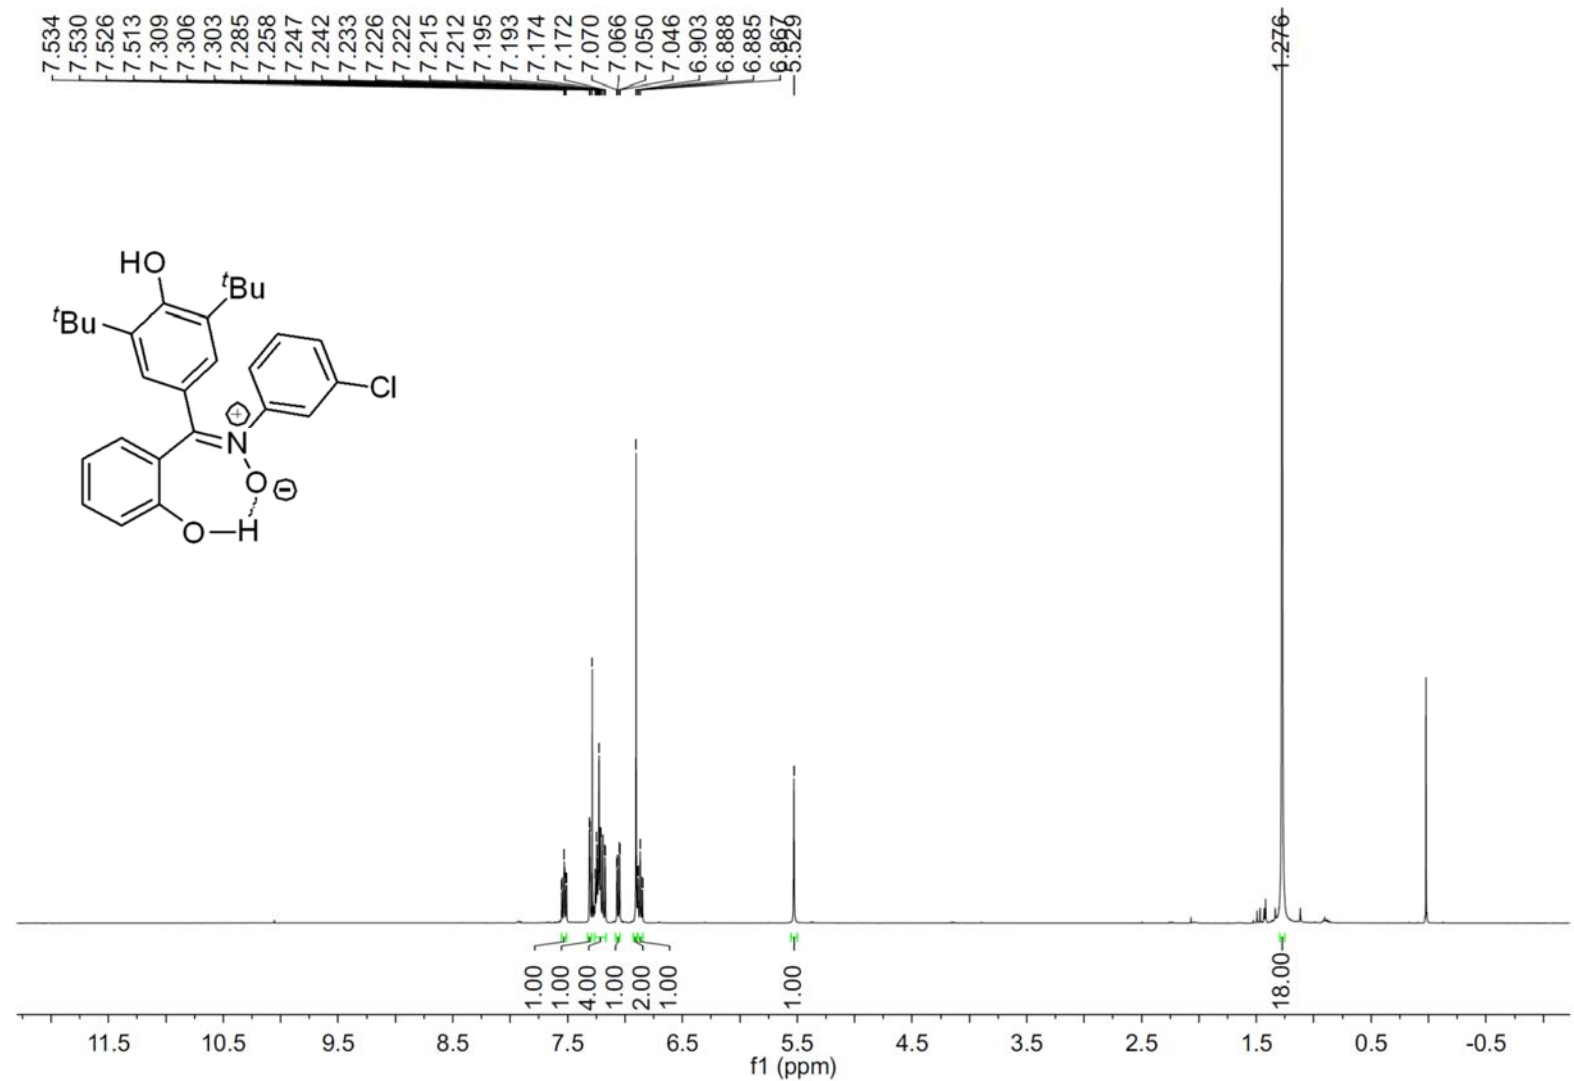

<sup>1</sup>H NMR Spectrum of Compound 3h

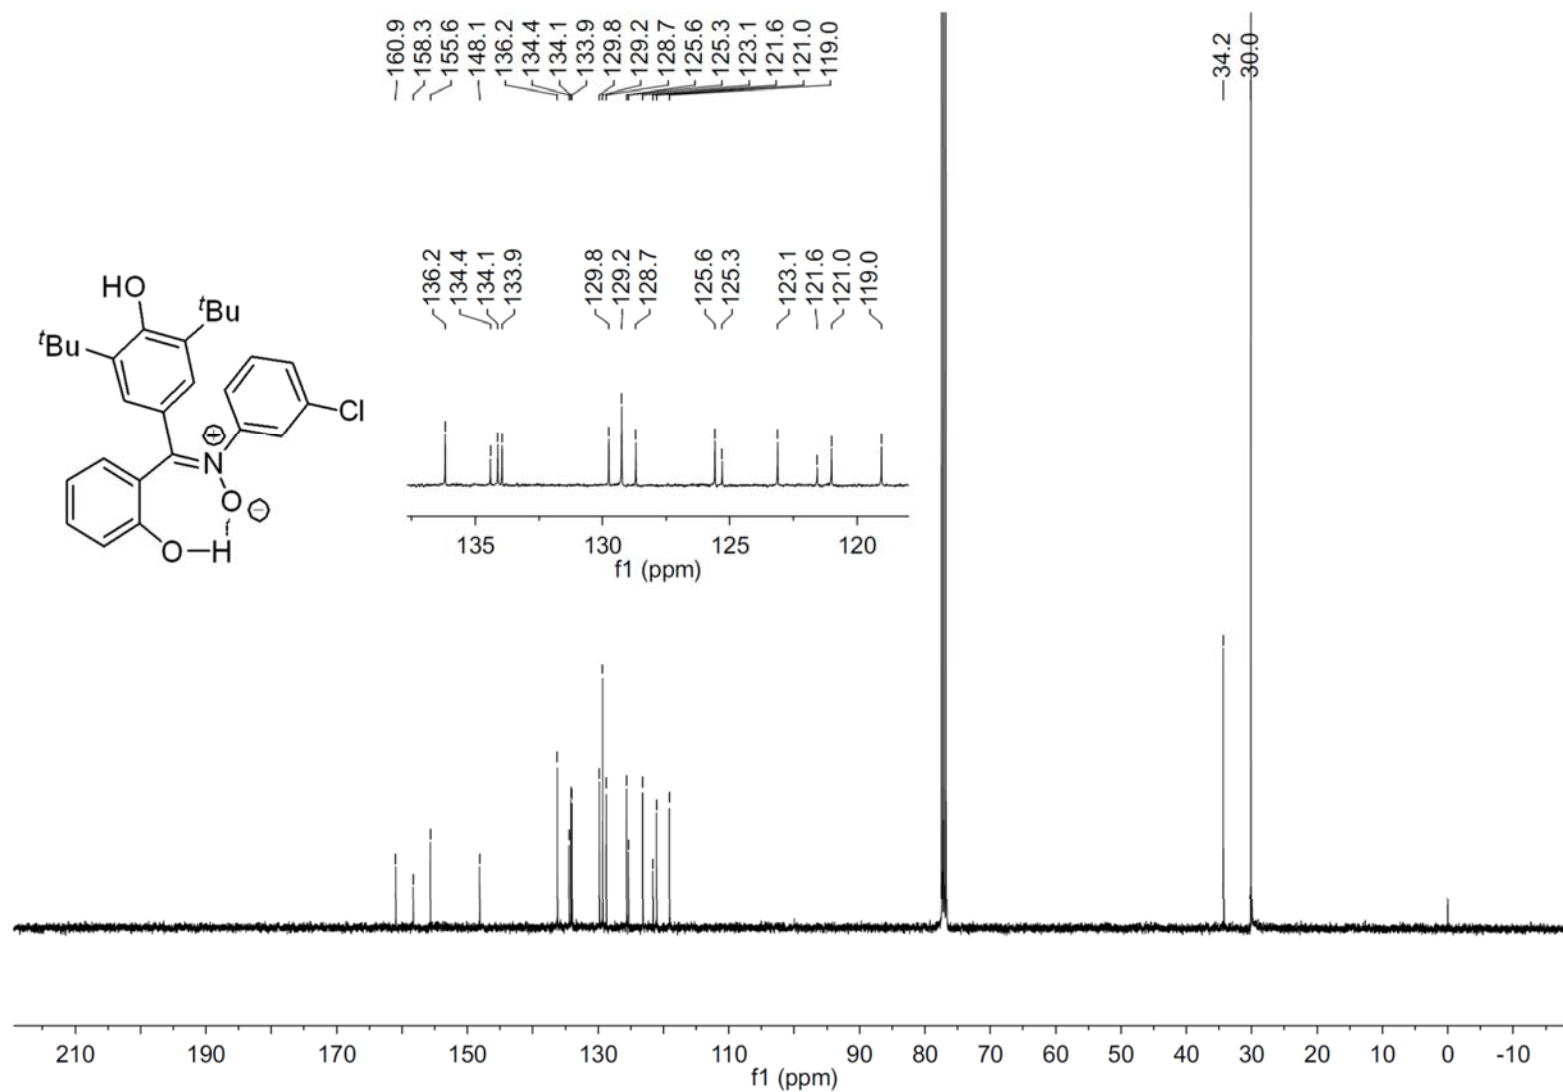

**<sup>13</sup>C NMR Spectrum of Compound 3h**

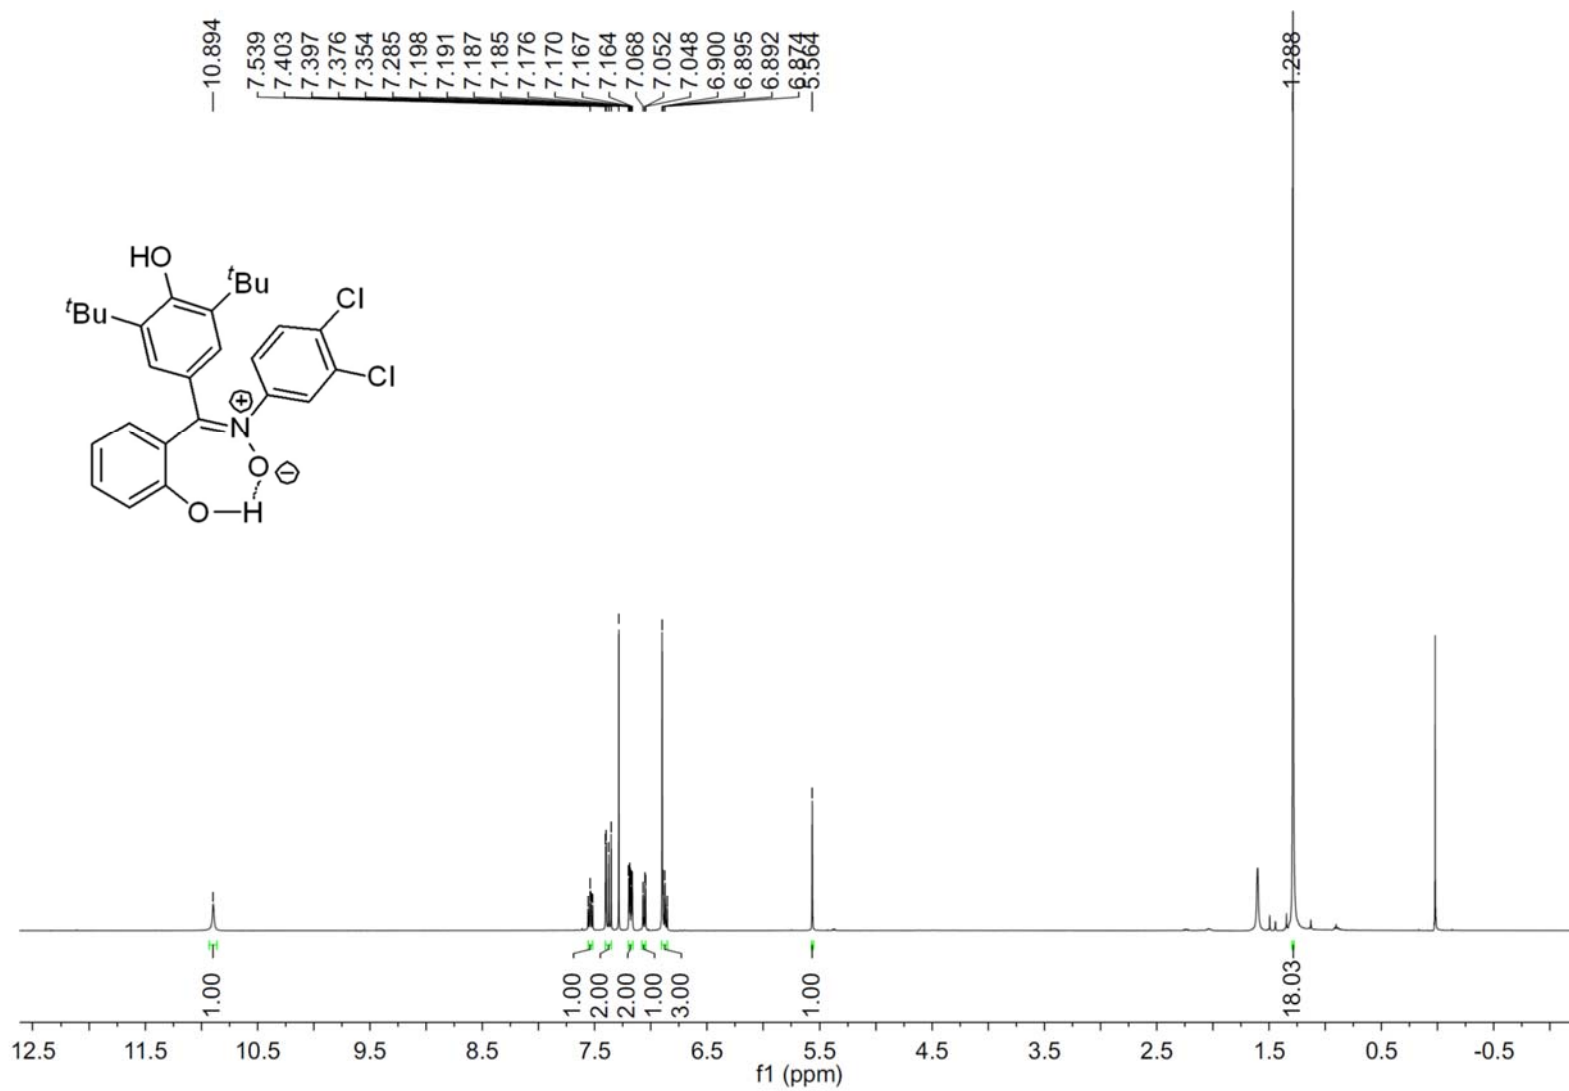

<sup>1</sup>H NMR Spectrum of Compound 3i

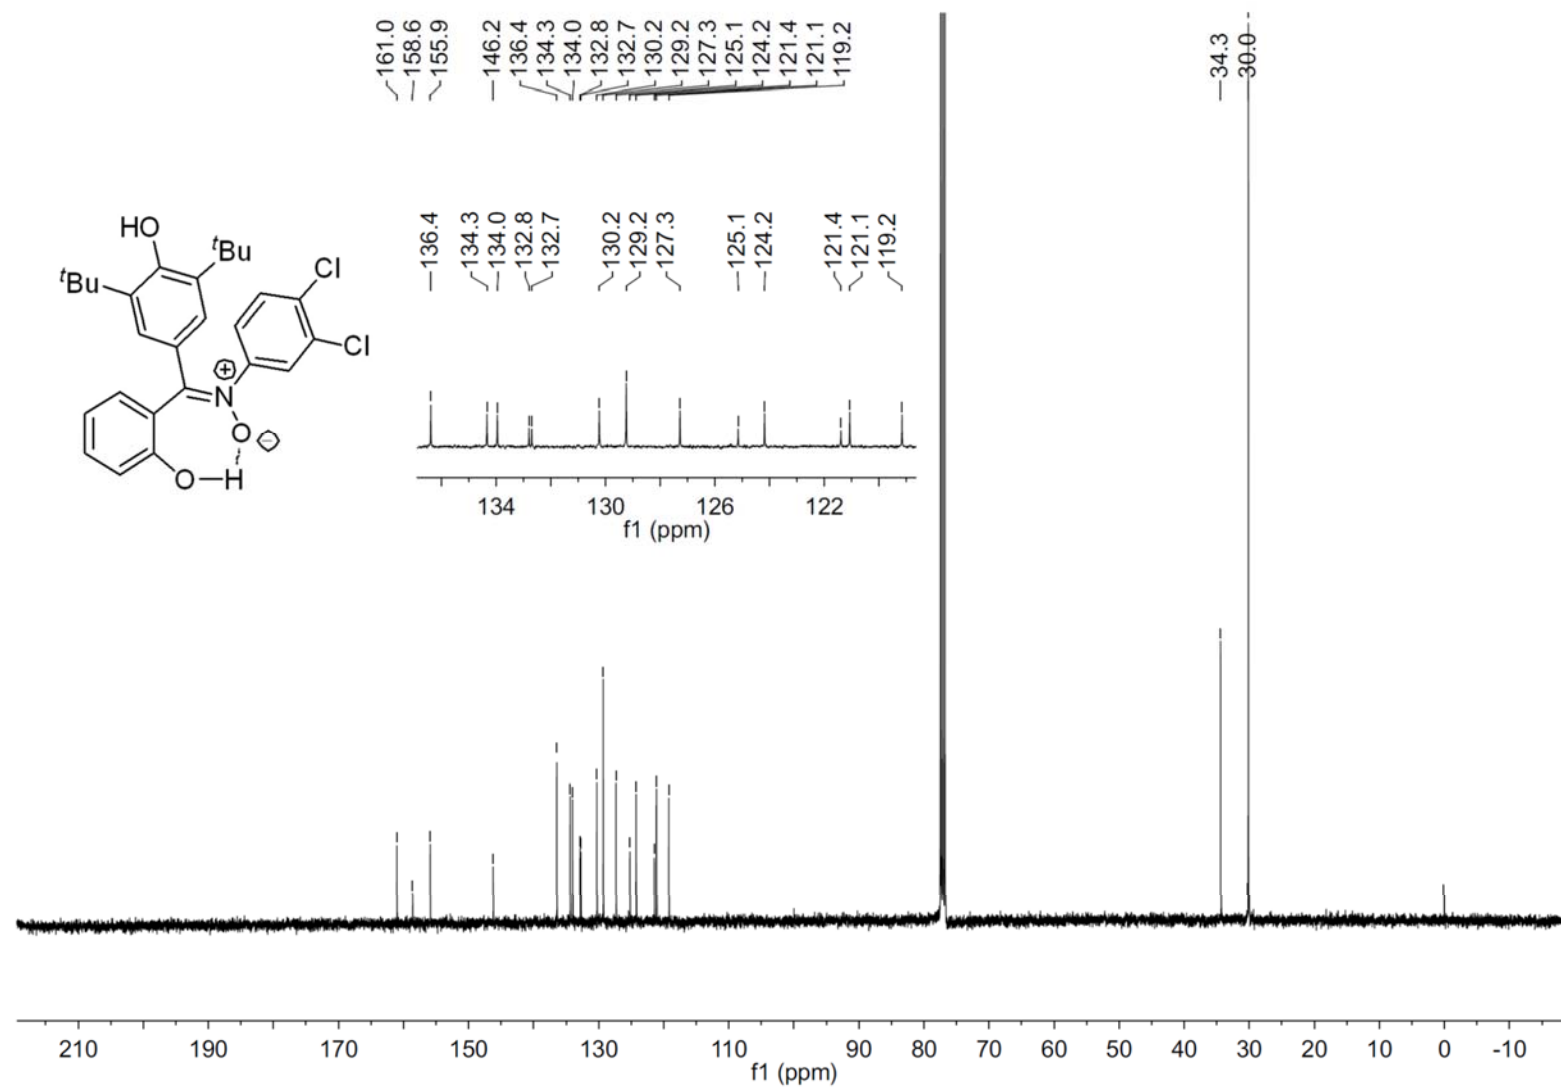

$^{13}\text{C}$  NMR Spectrum of Compound 3i

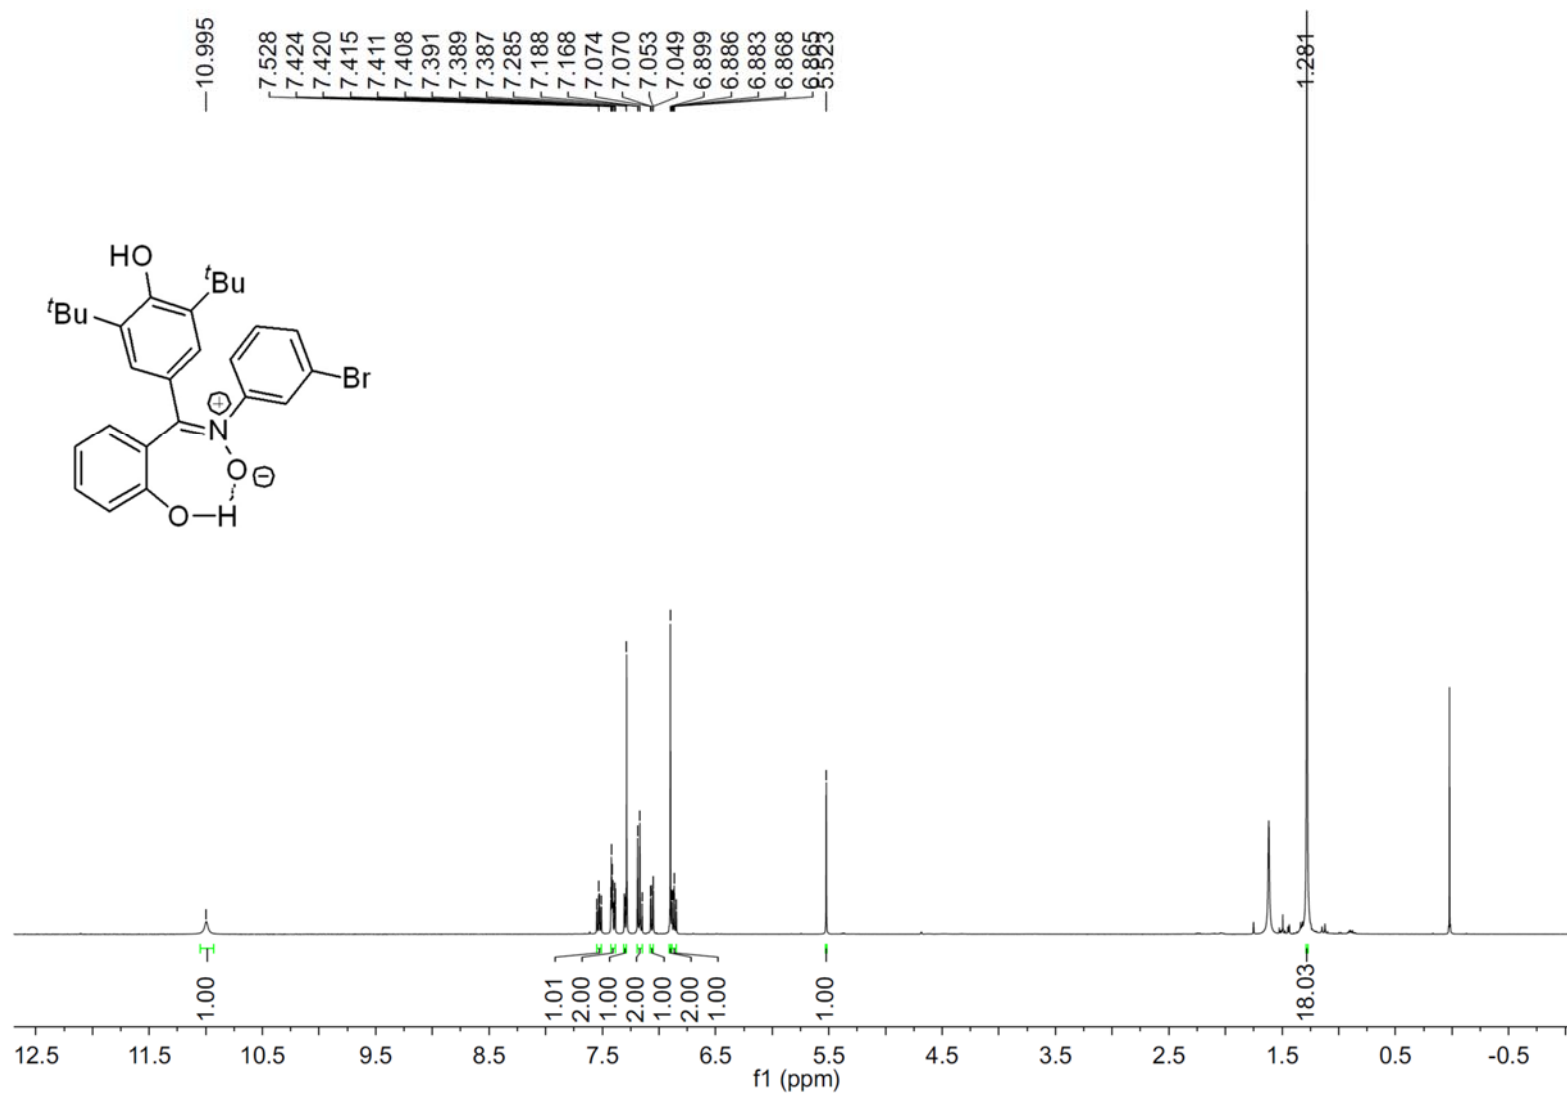

<sup>1</sup>H NMR Spectrum of Compound 3j

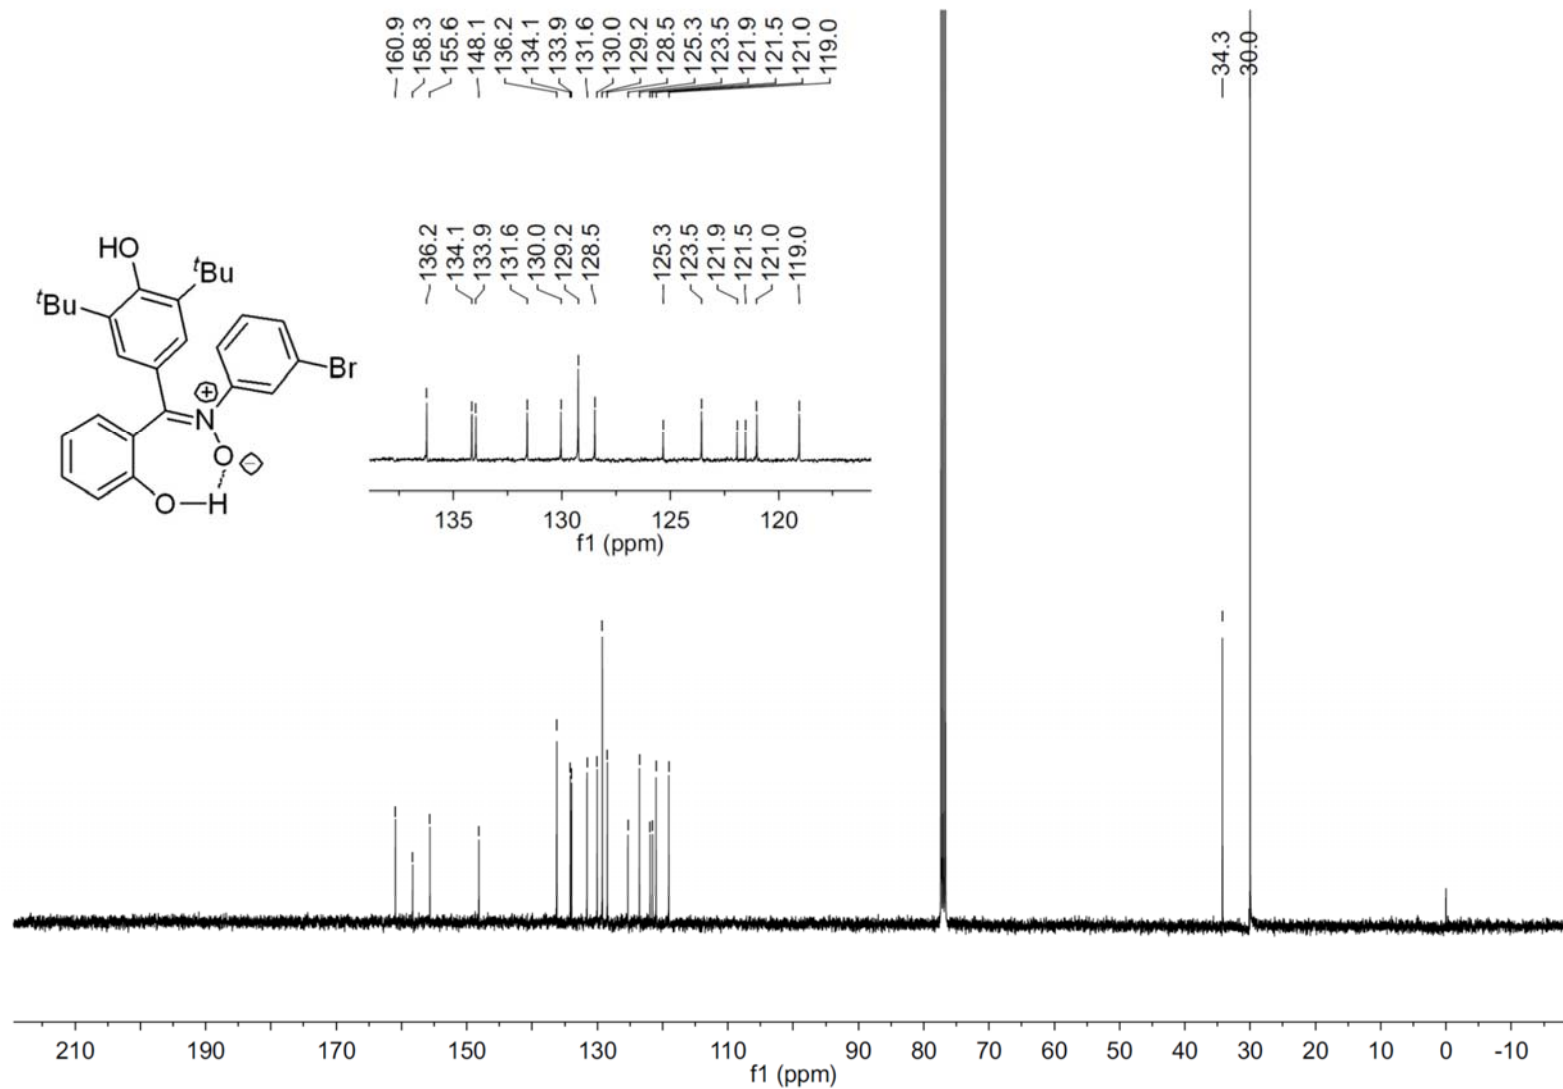

**<sup>13</sup>C NMR Spectrum of Compound 3j**

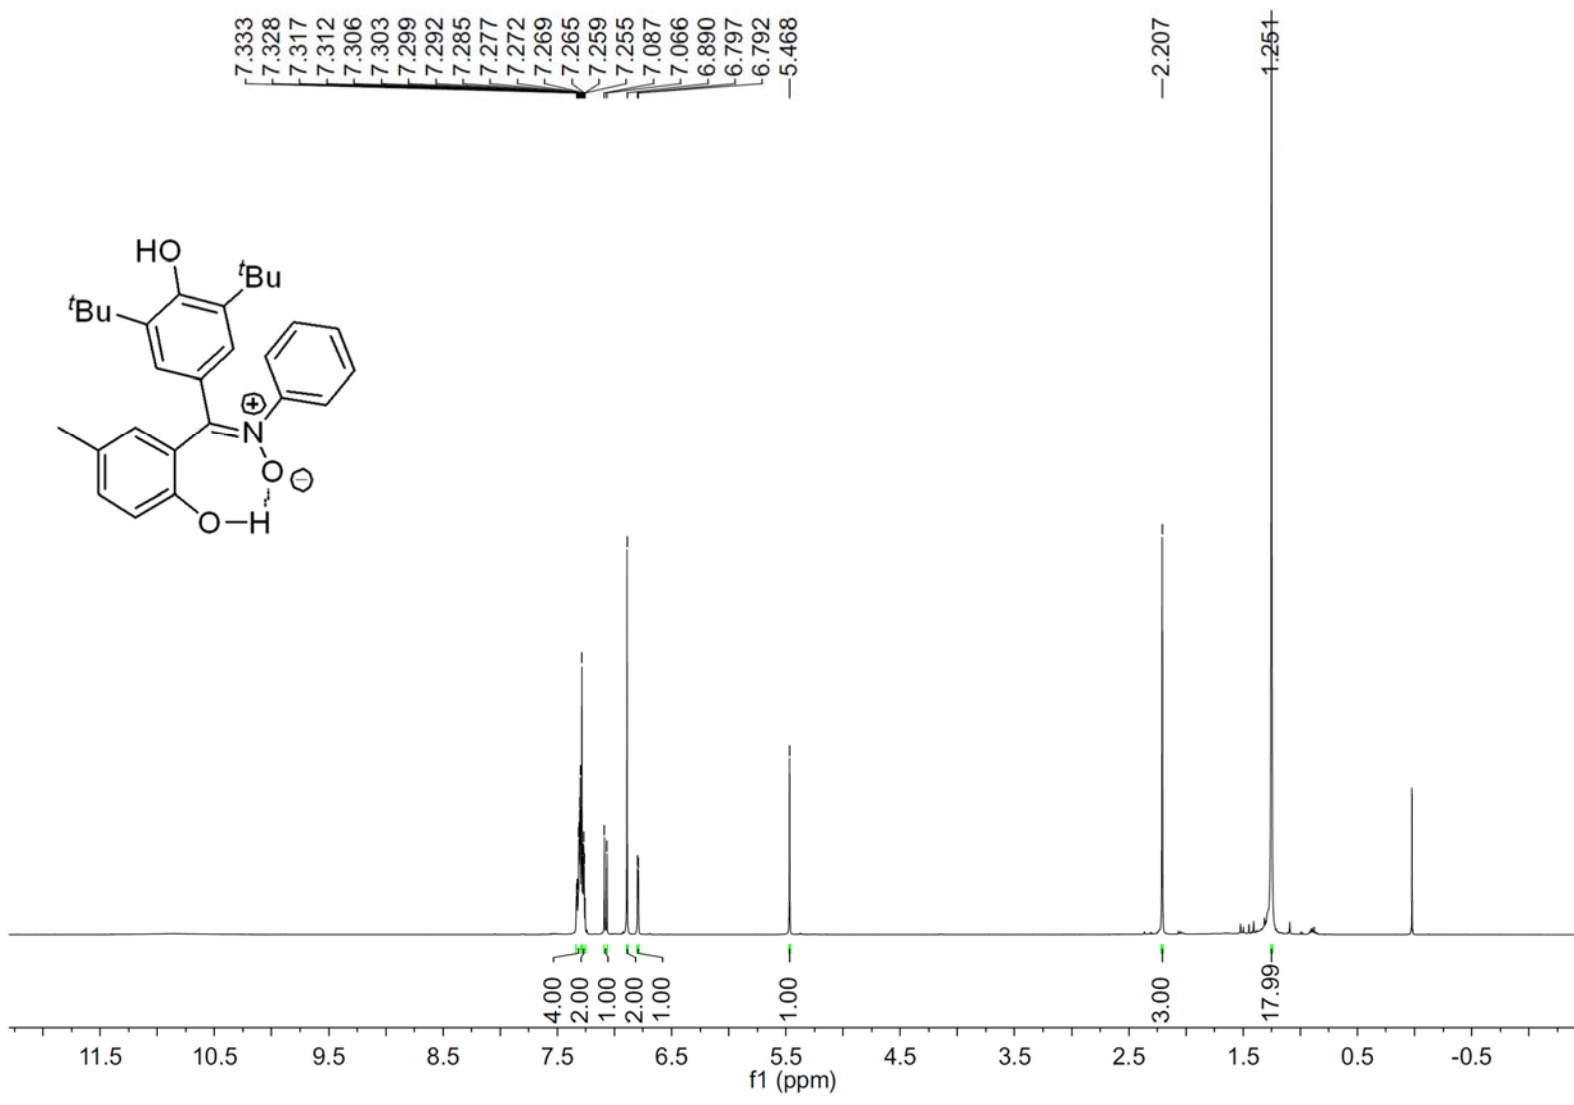

<sup>1</sup>H NMR Spectrum of Compound 3k

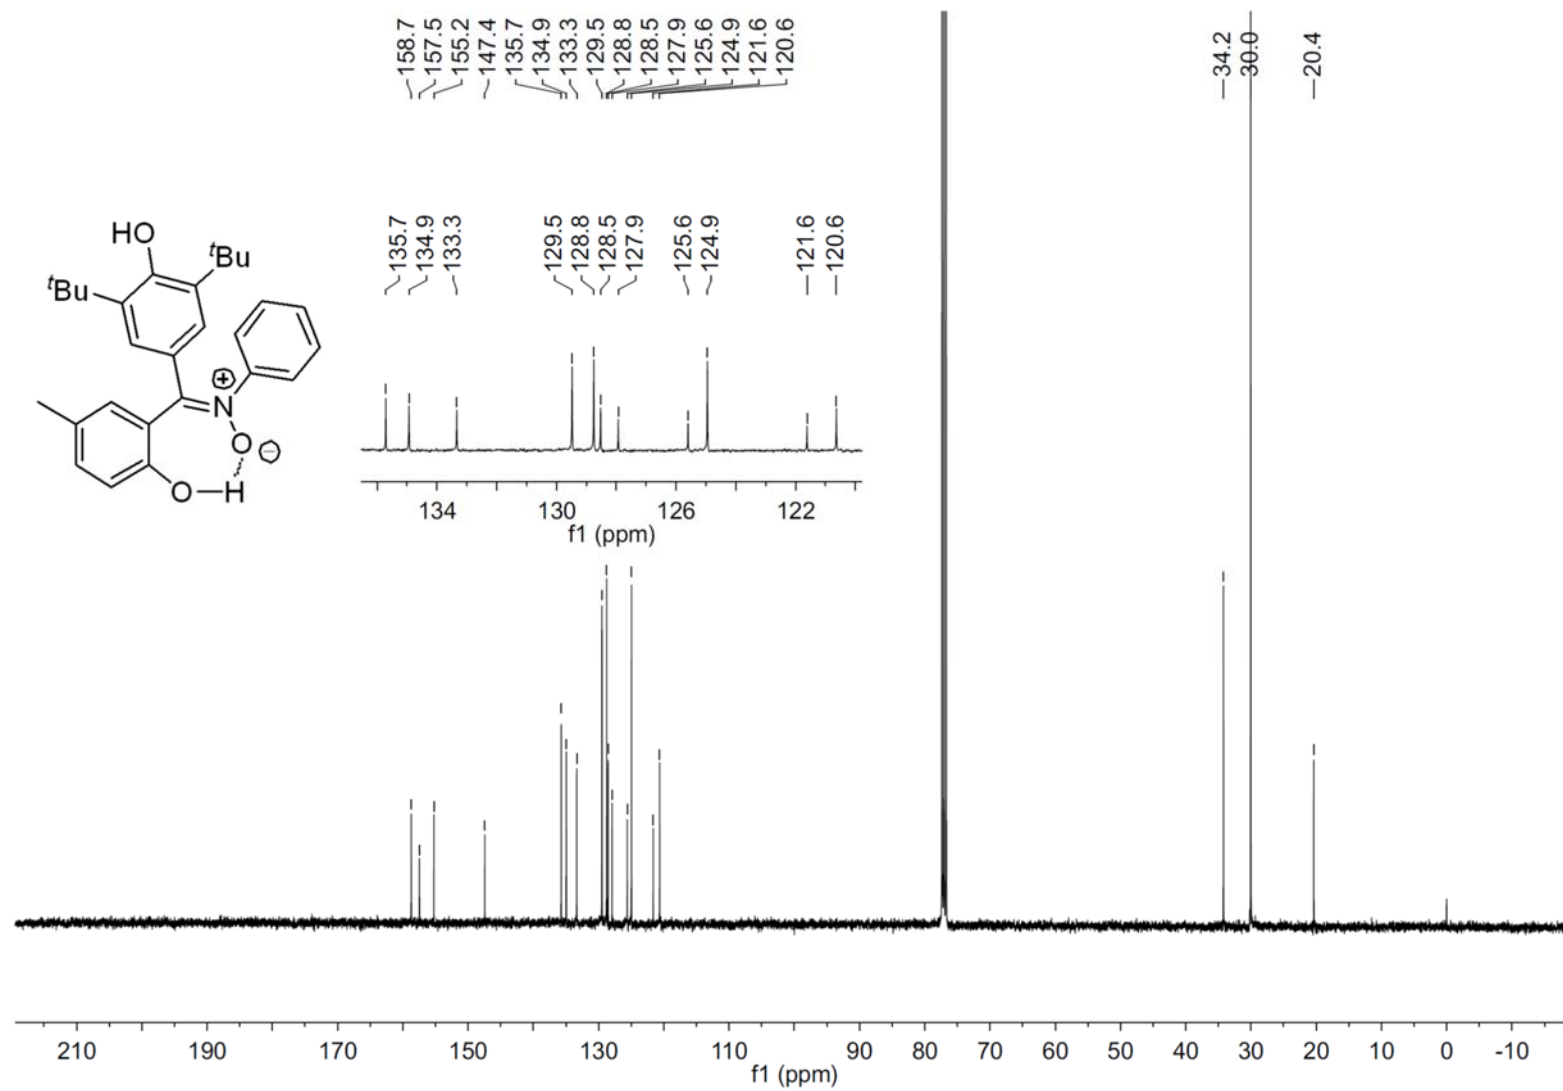

<sup>13</sup>C NMR Spectrum of Compound 3k



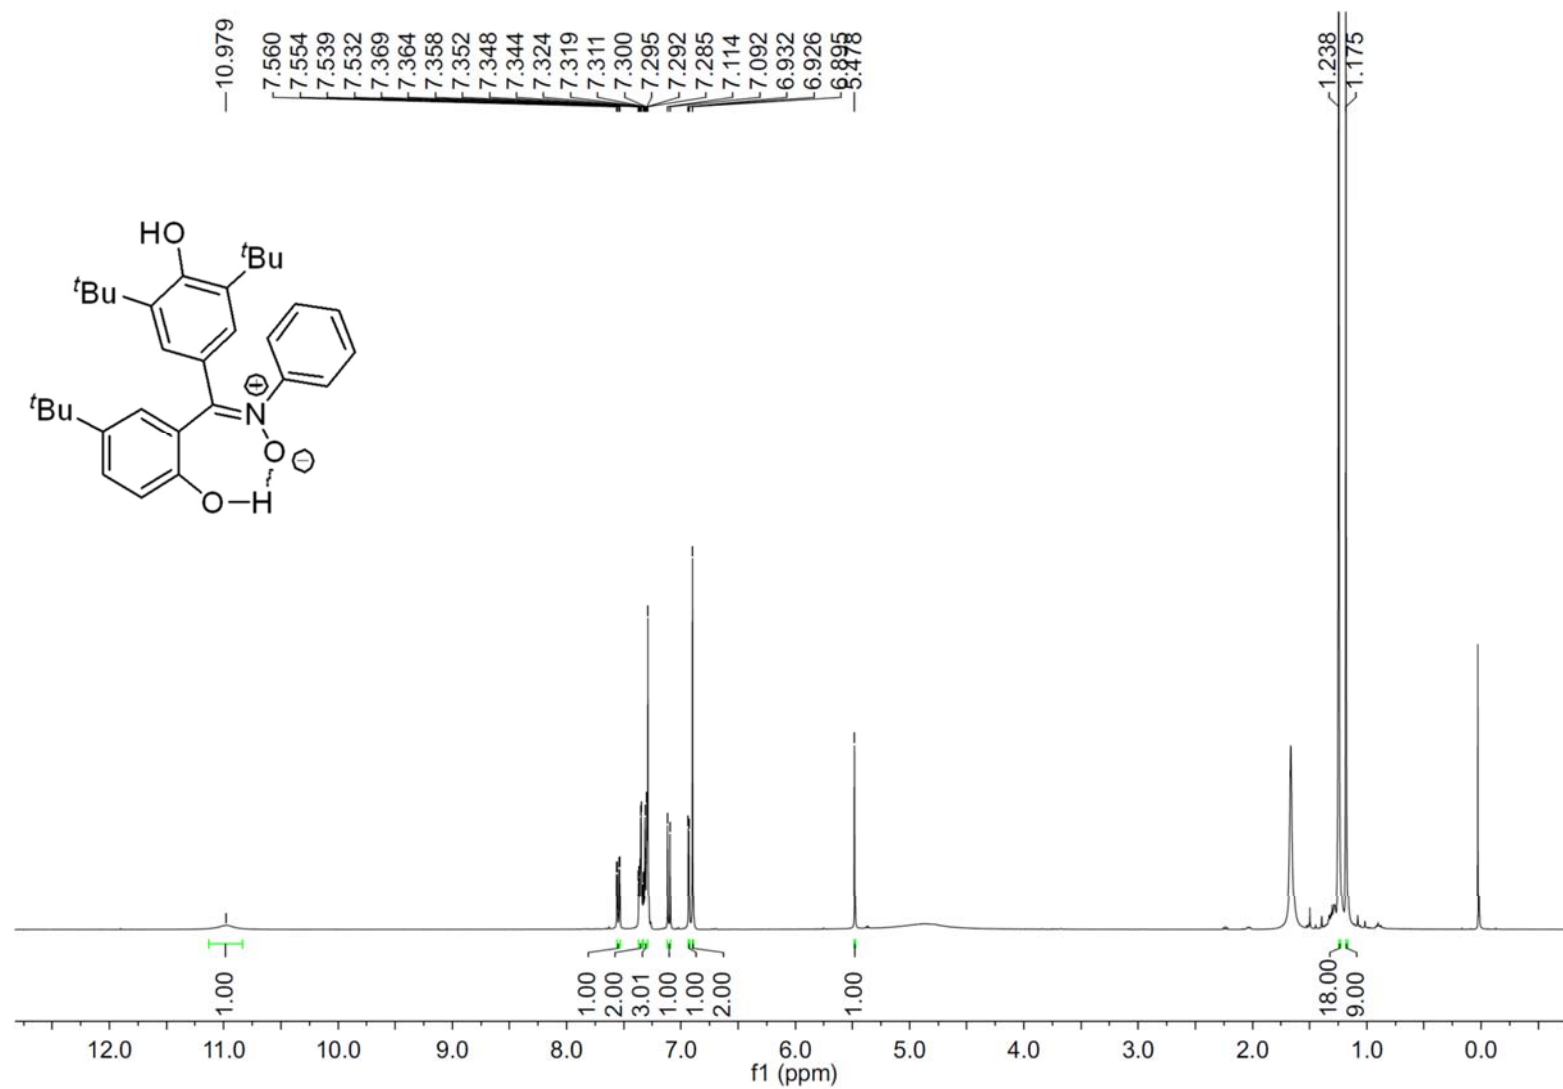

<sup>1</sup>H NMR Spectrum of Compound 31

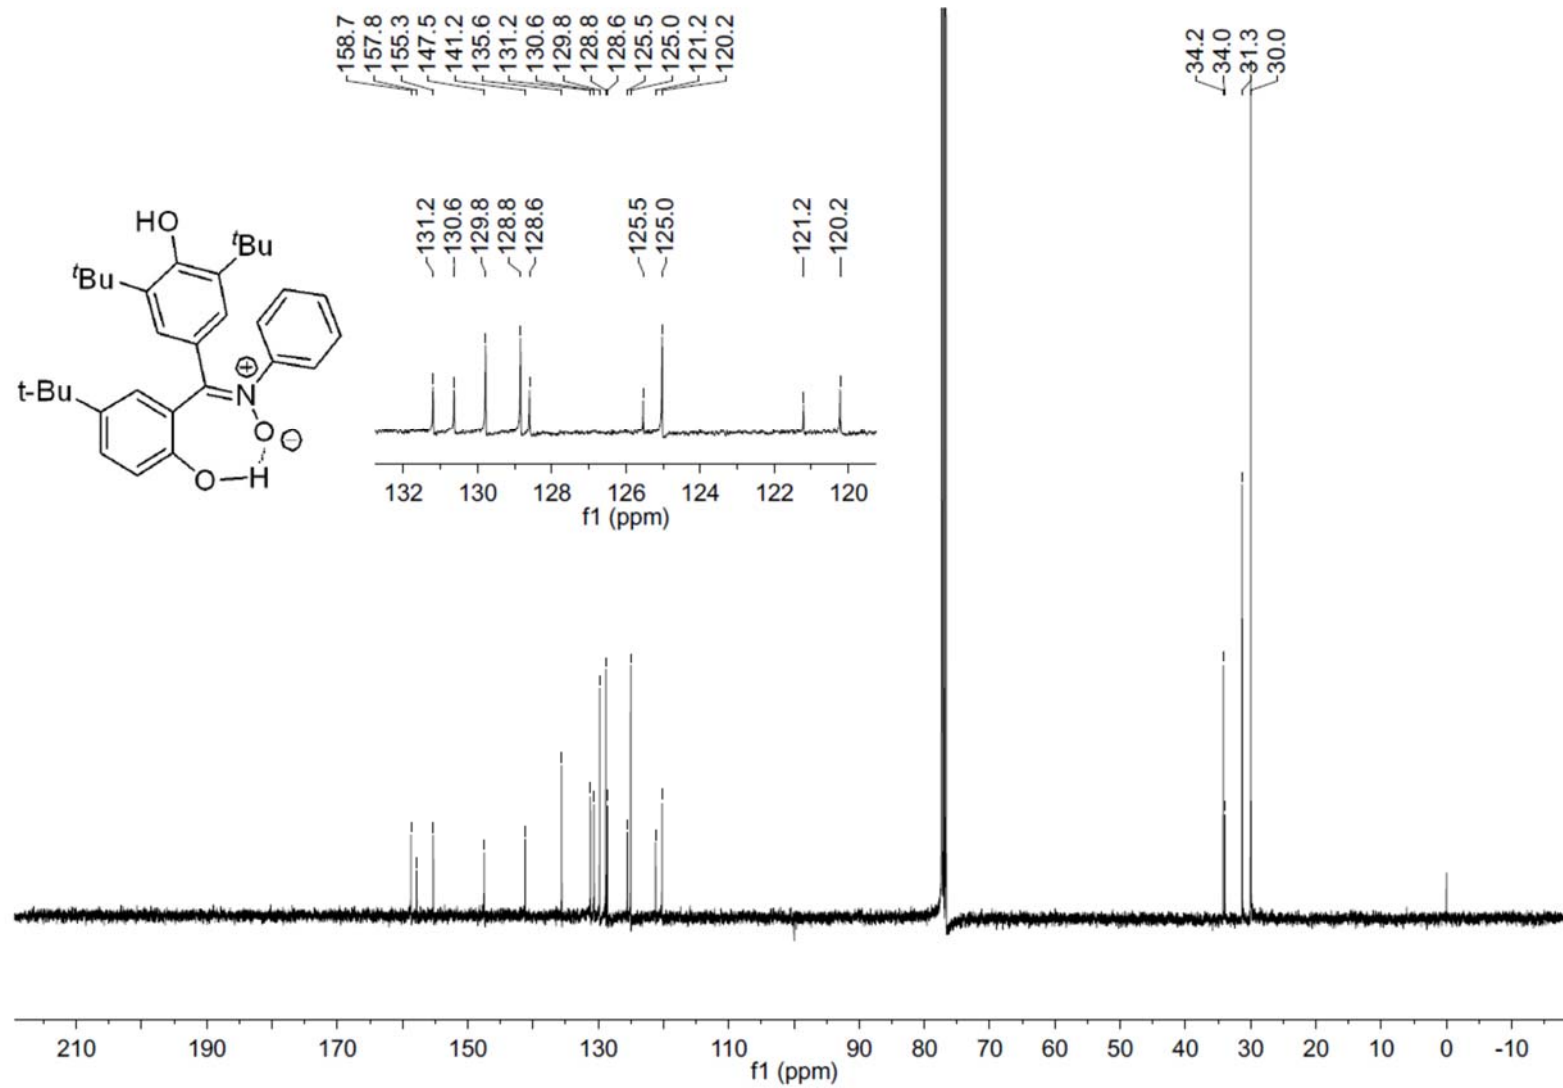

$^{13}\text{C}$  NMR Spectrum of Compound 31

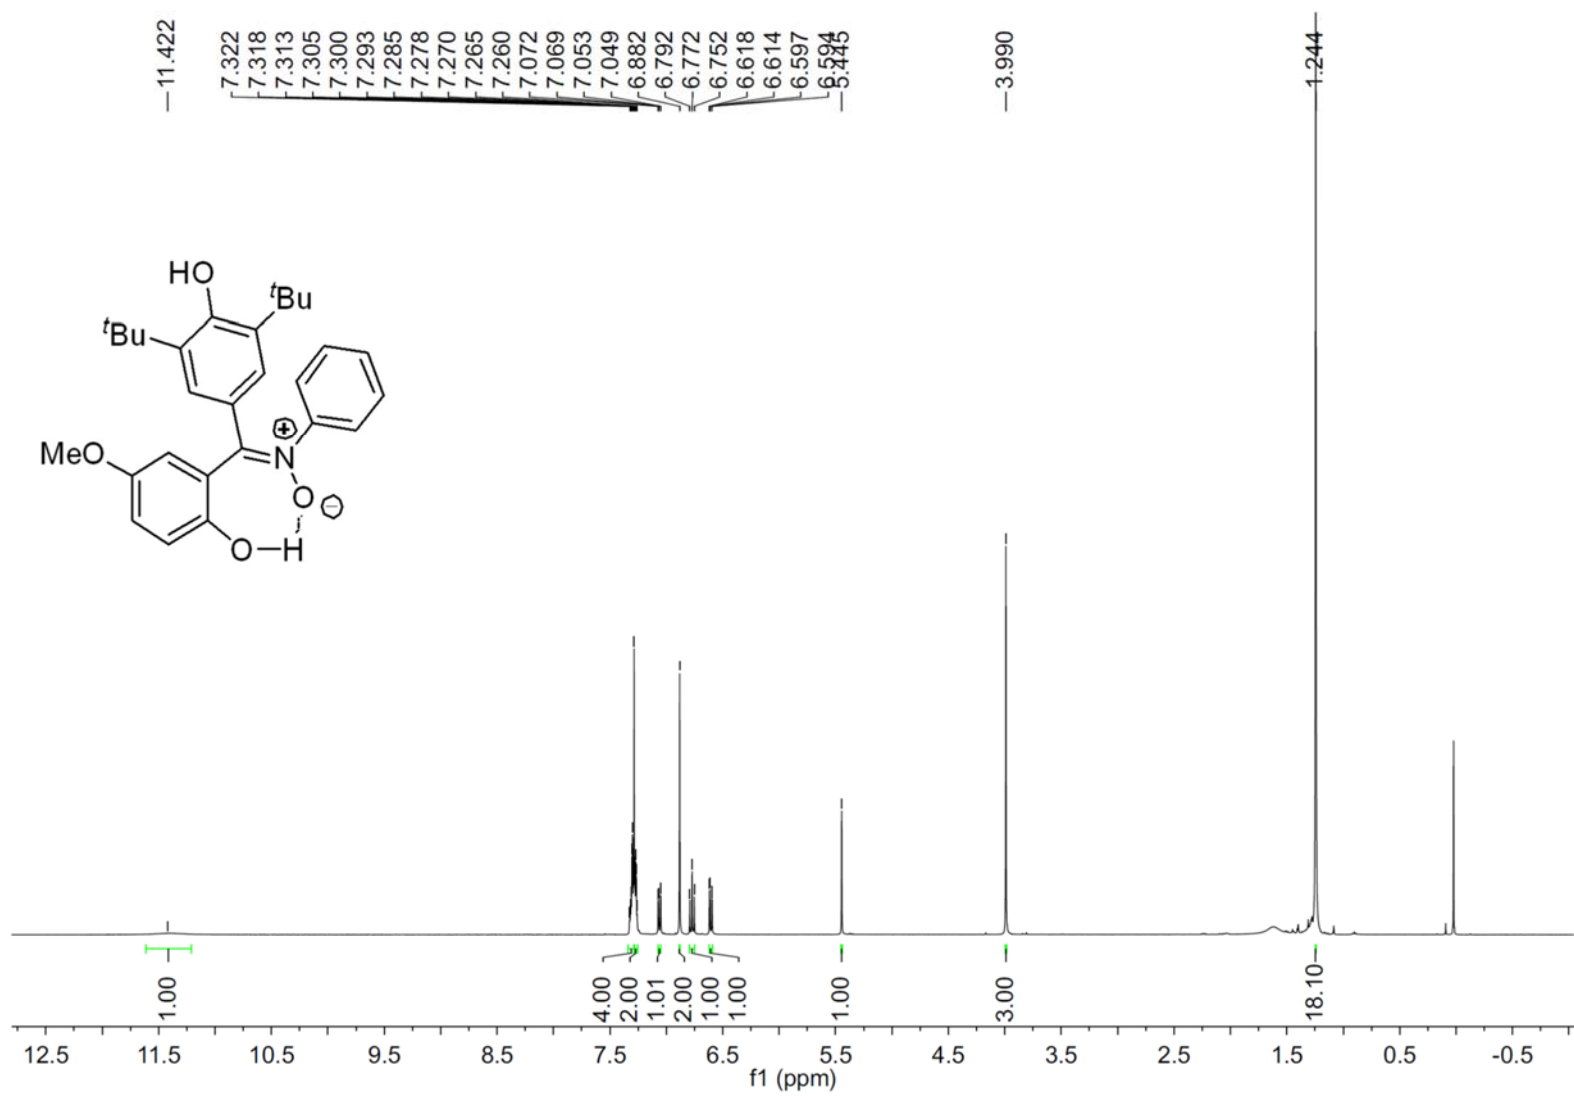

**<sup>1</sup>H NMR Spectrum of Compound 3m**

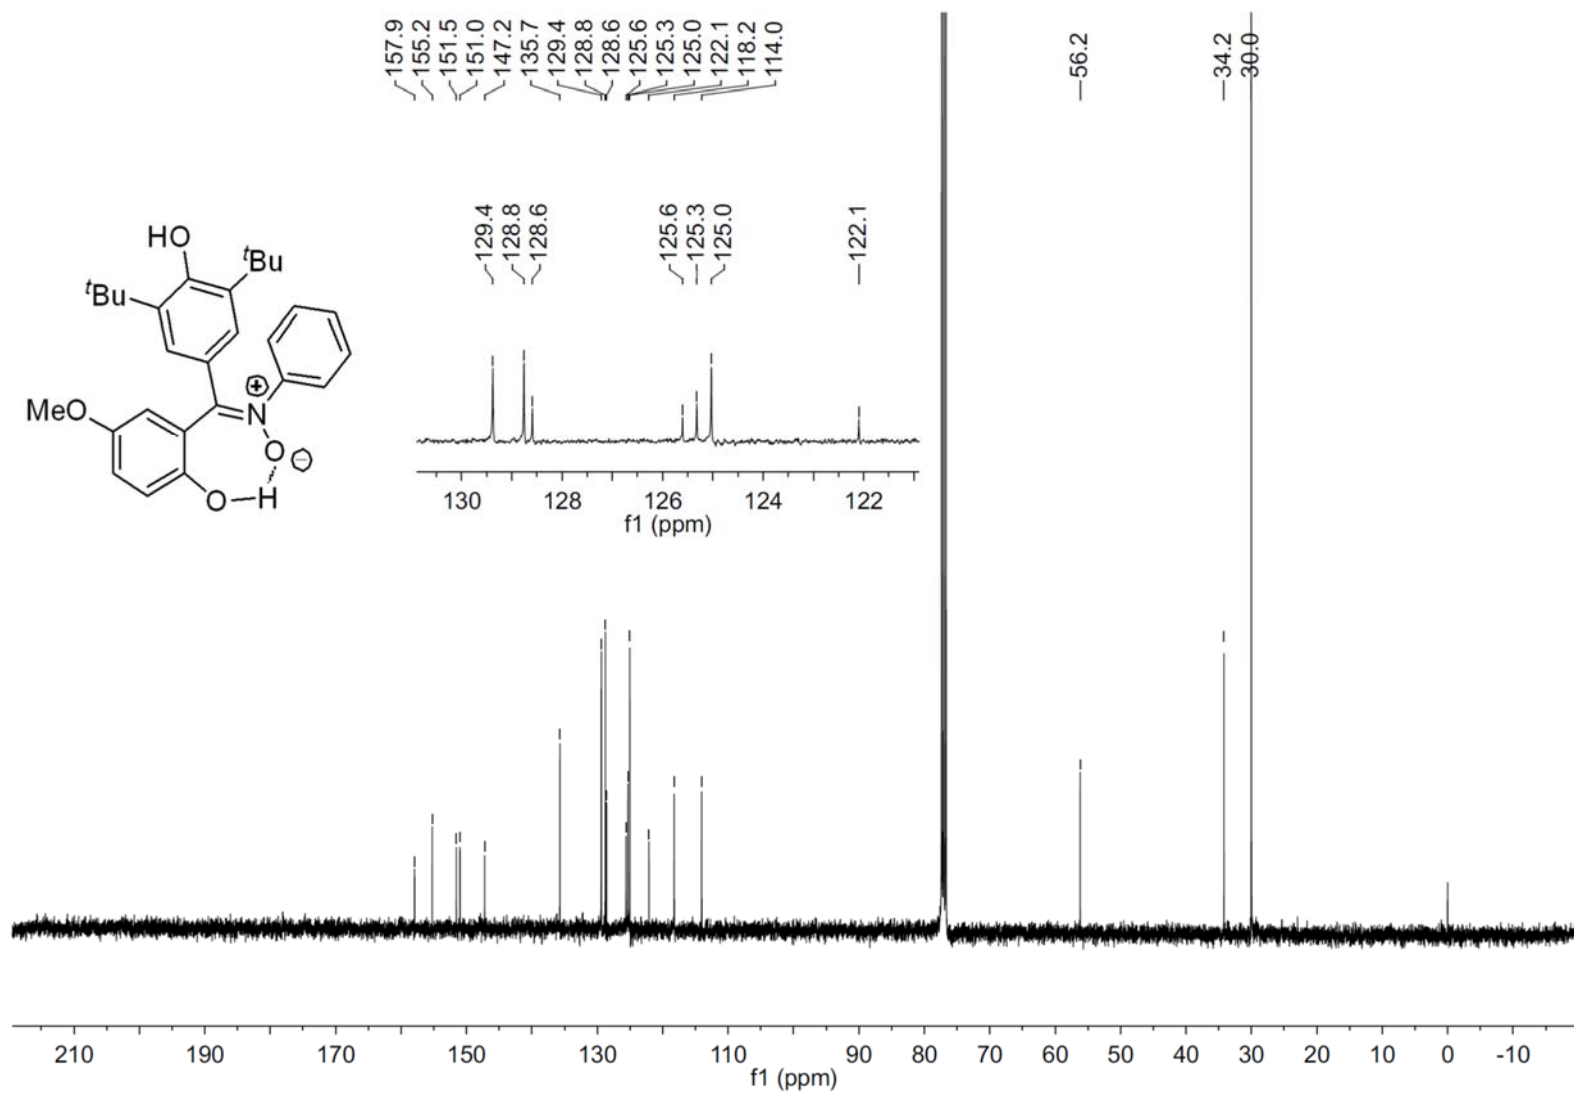

<sup>13</sup>C NMR Spectrum of Compound 3m

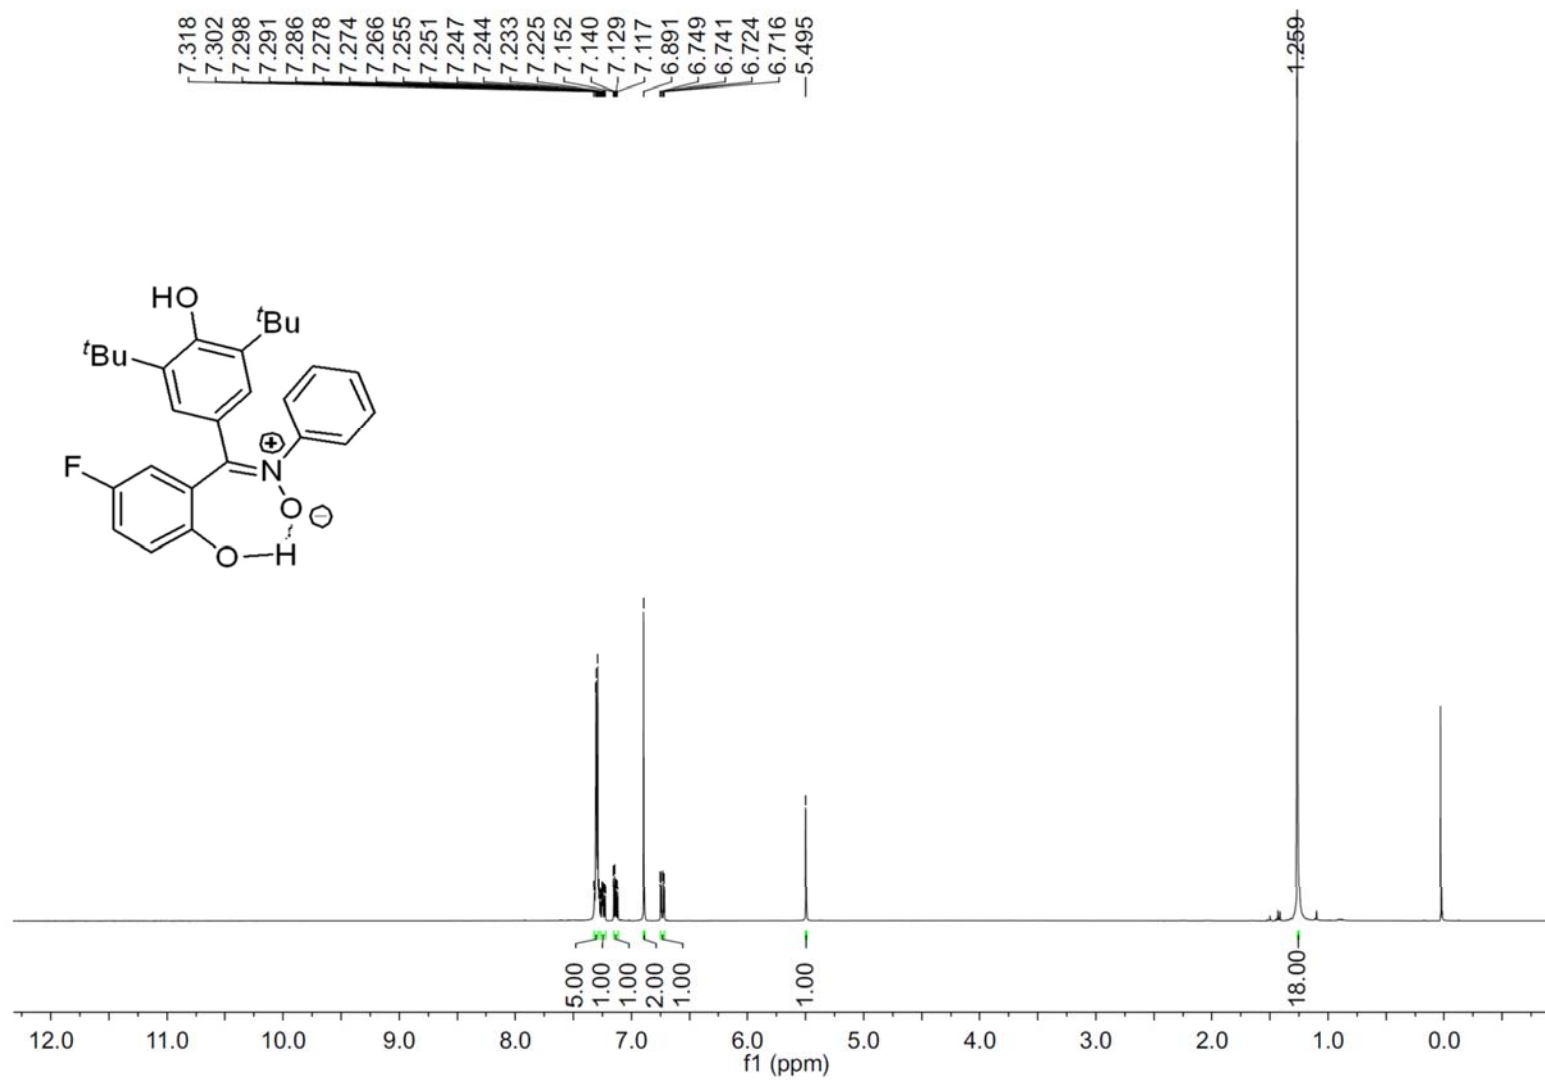

<sup>1</sup>H NMR Spectrum of Compound 3n

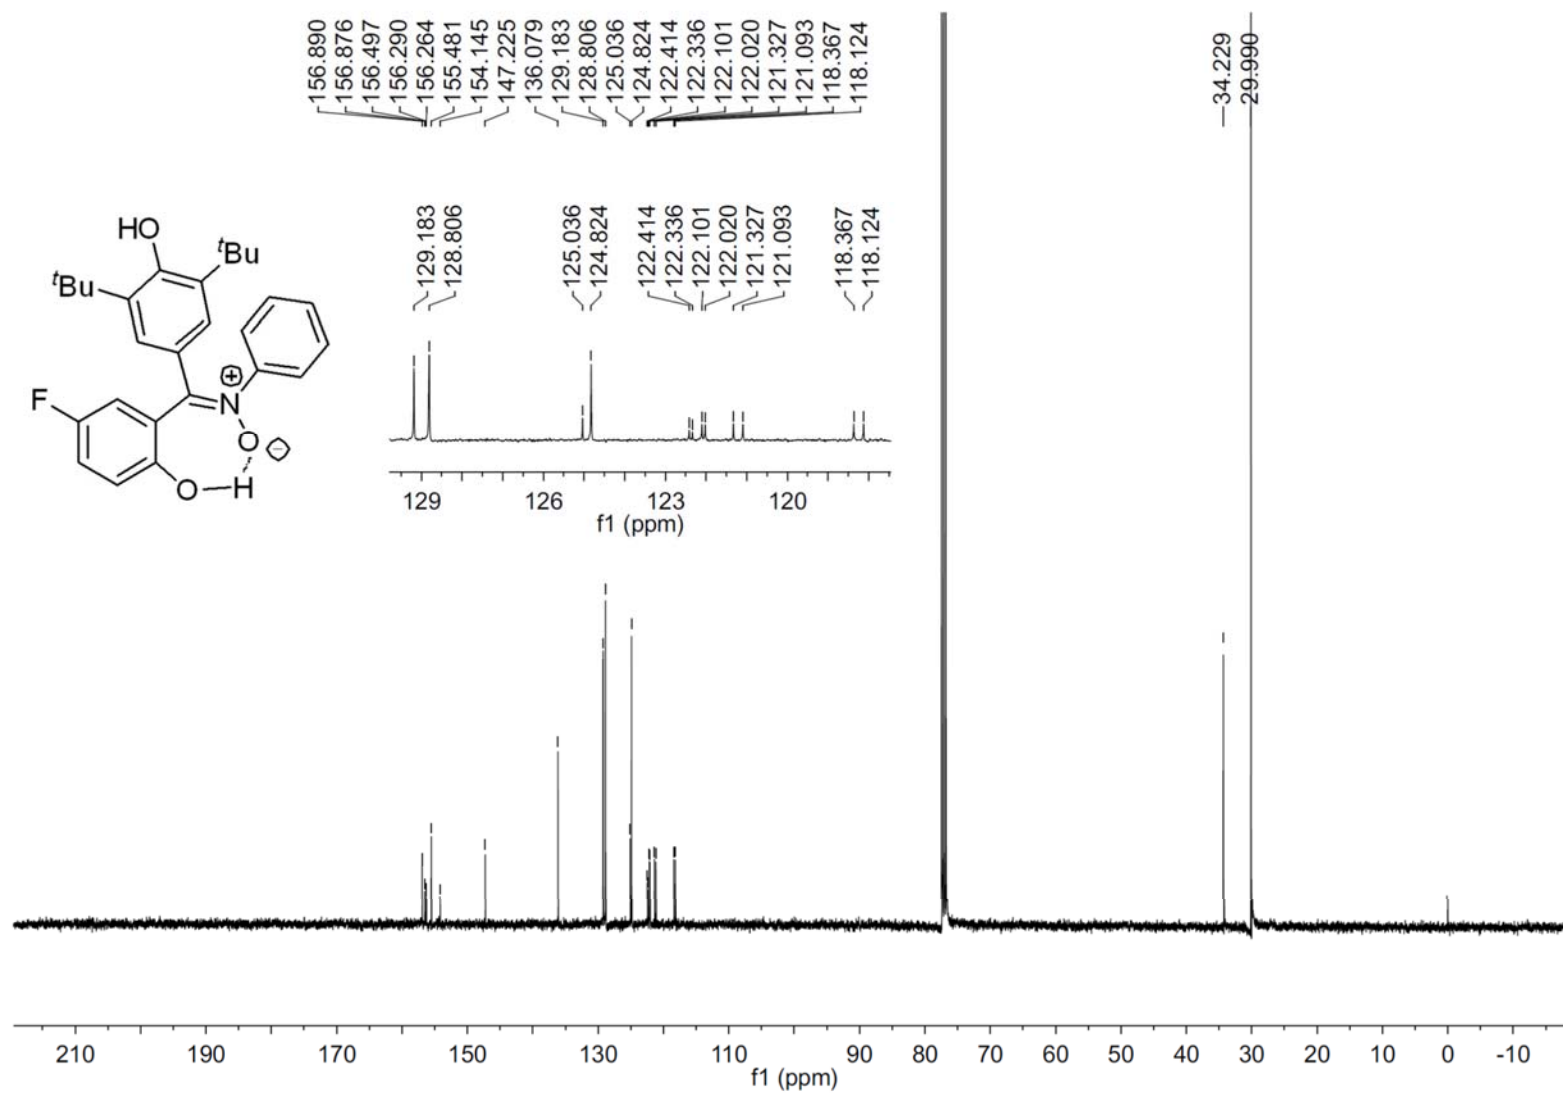

<sup>13</sup>C NMR Spectrum of Compound 3n

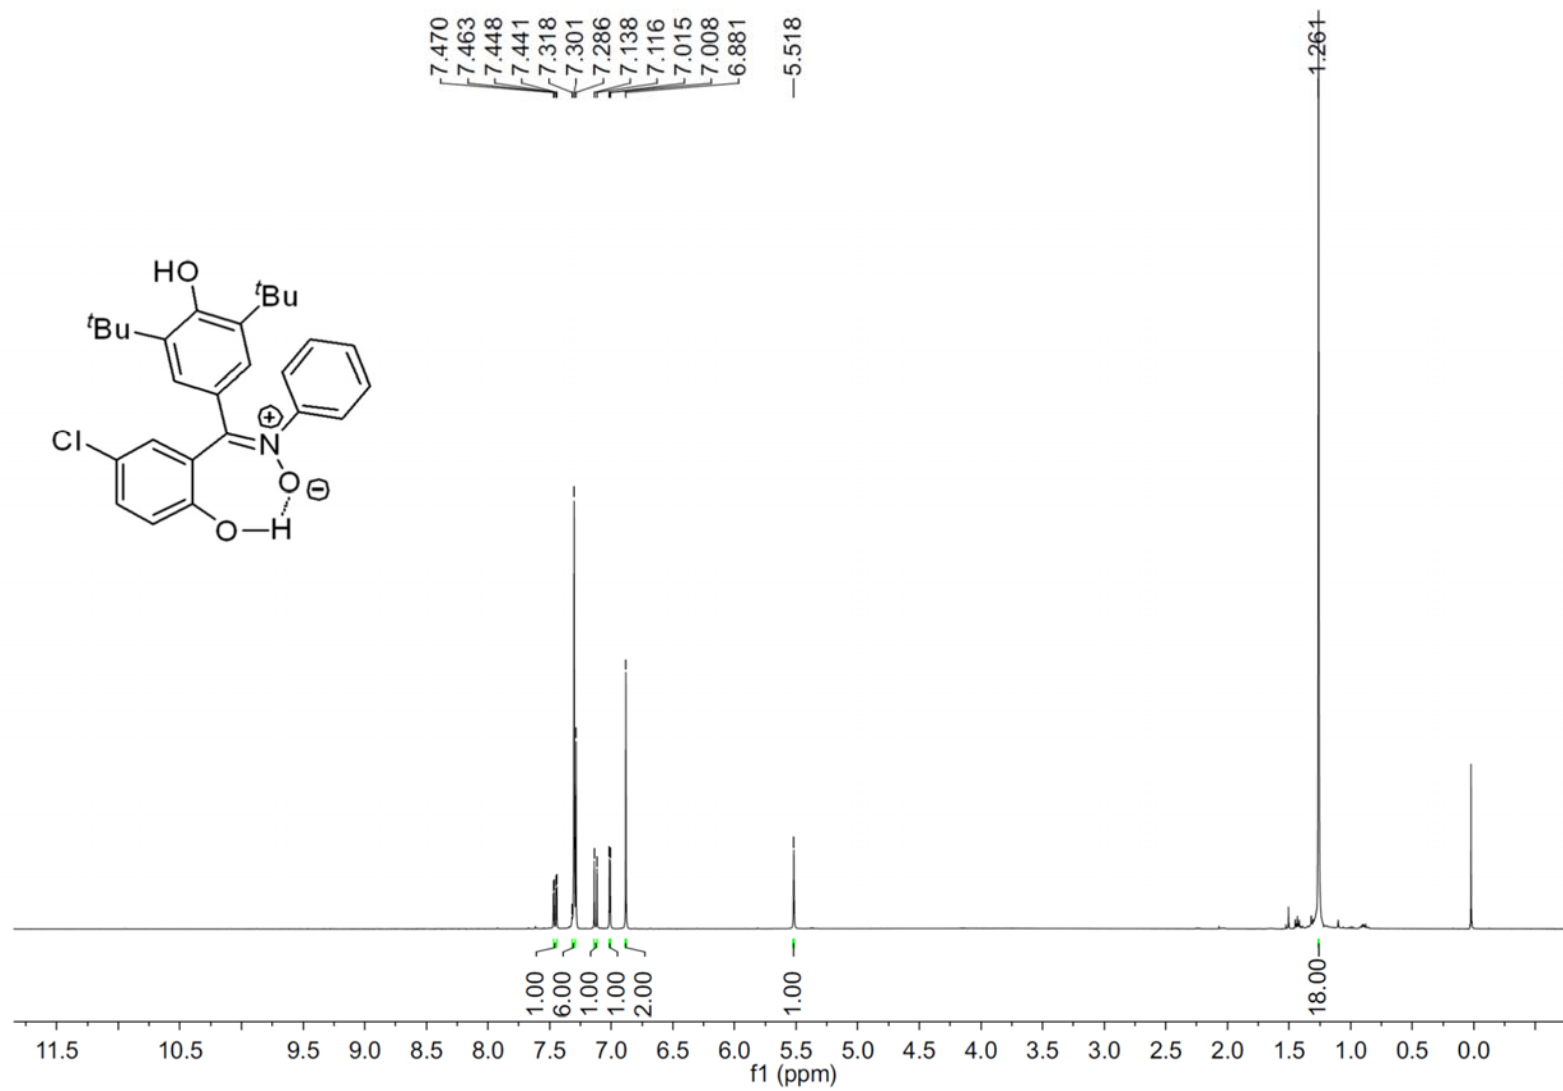

<sup>1</sup>H NMR Spectrum of Compound 3o

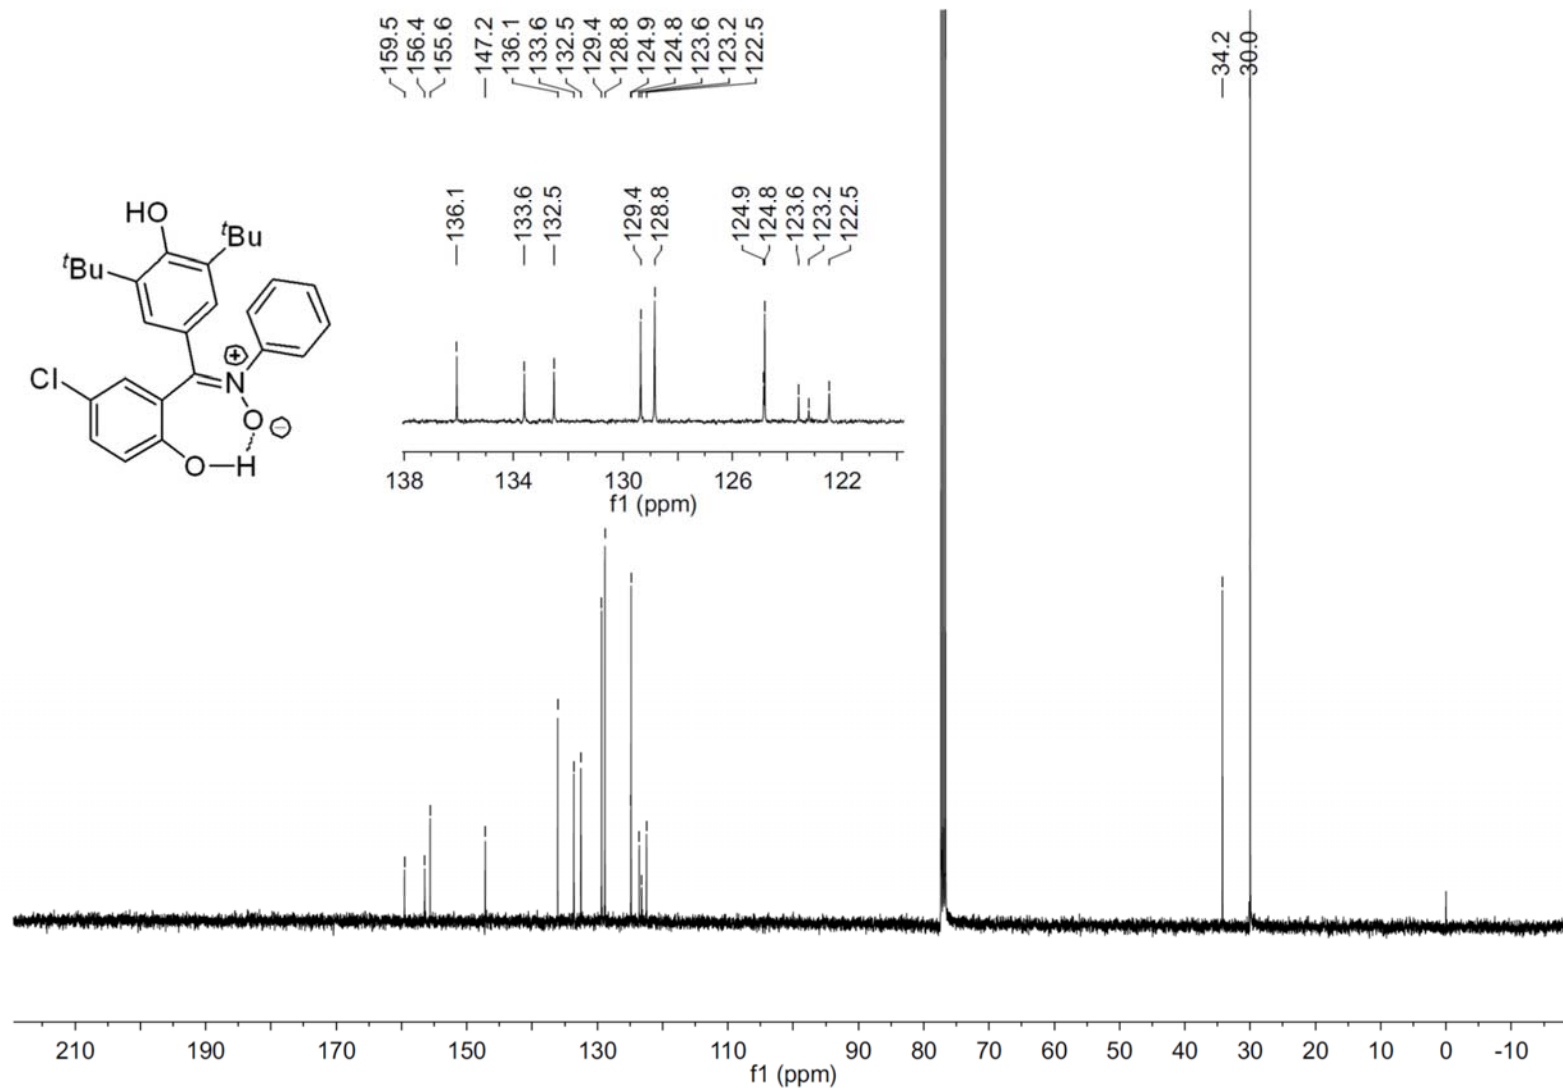

$^{13}\text{C}$  NMR Spectrum of Compound 30



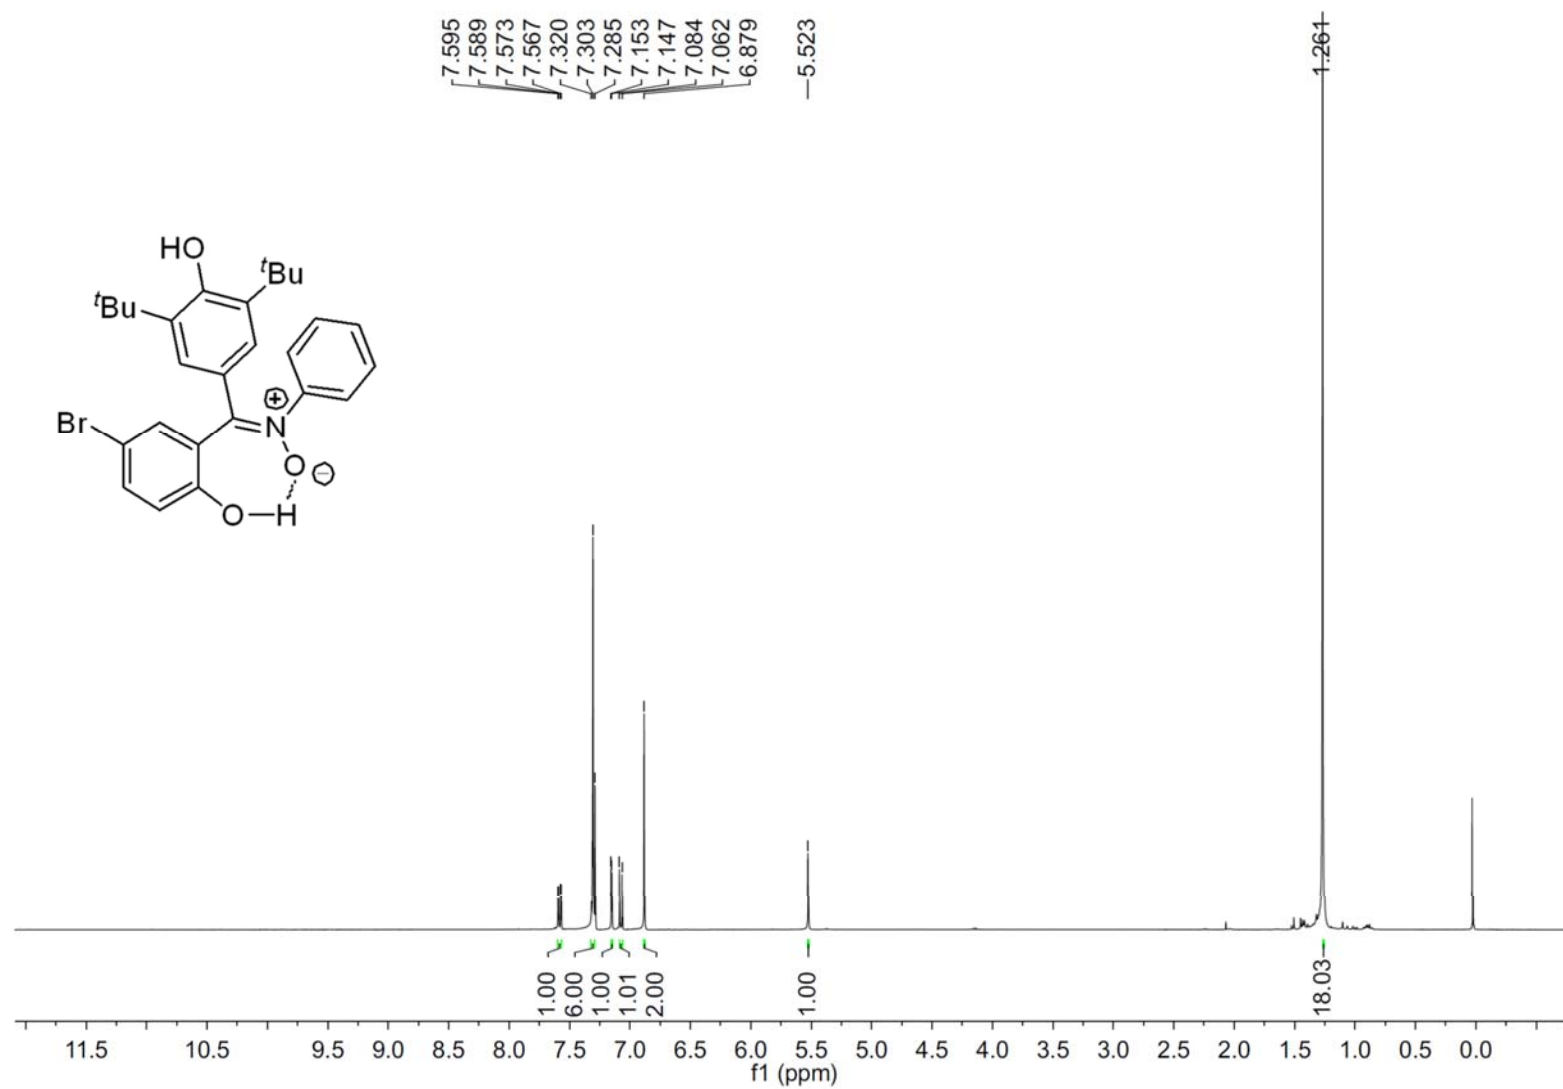

<sup>1</sup>H NMR Spectrum of Compound 3p

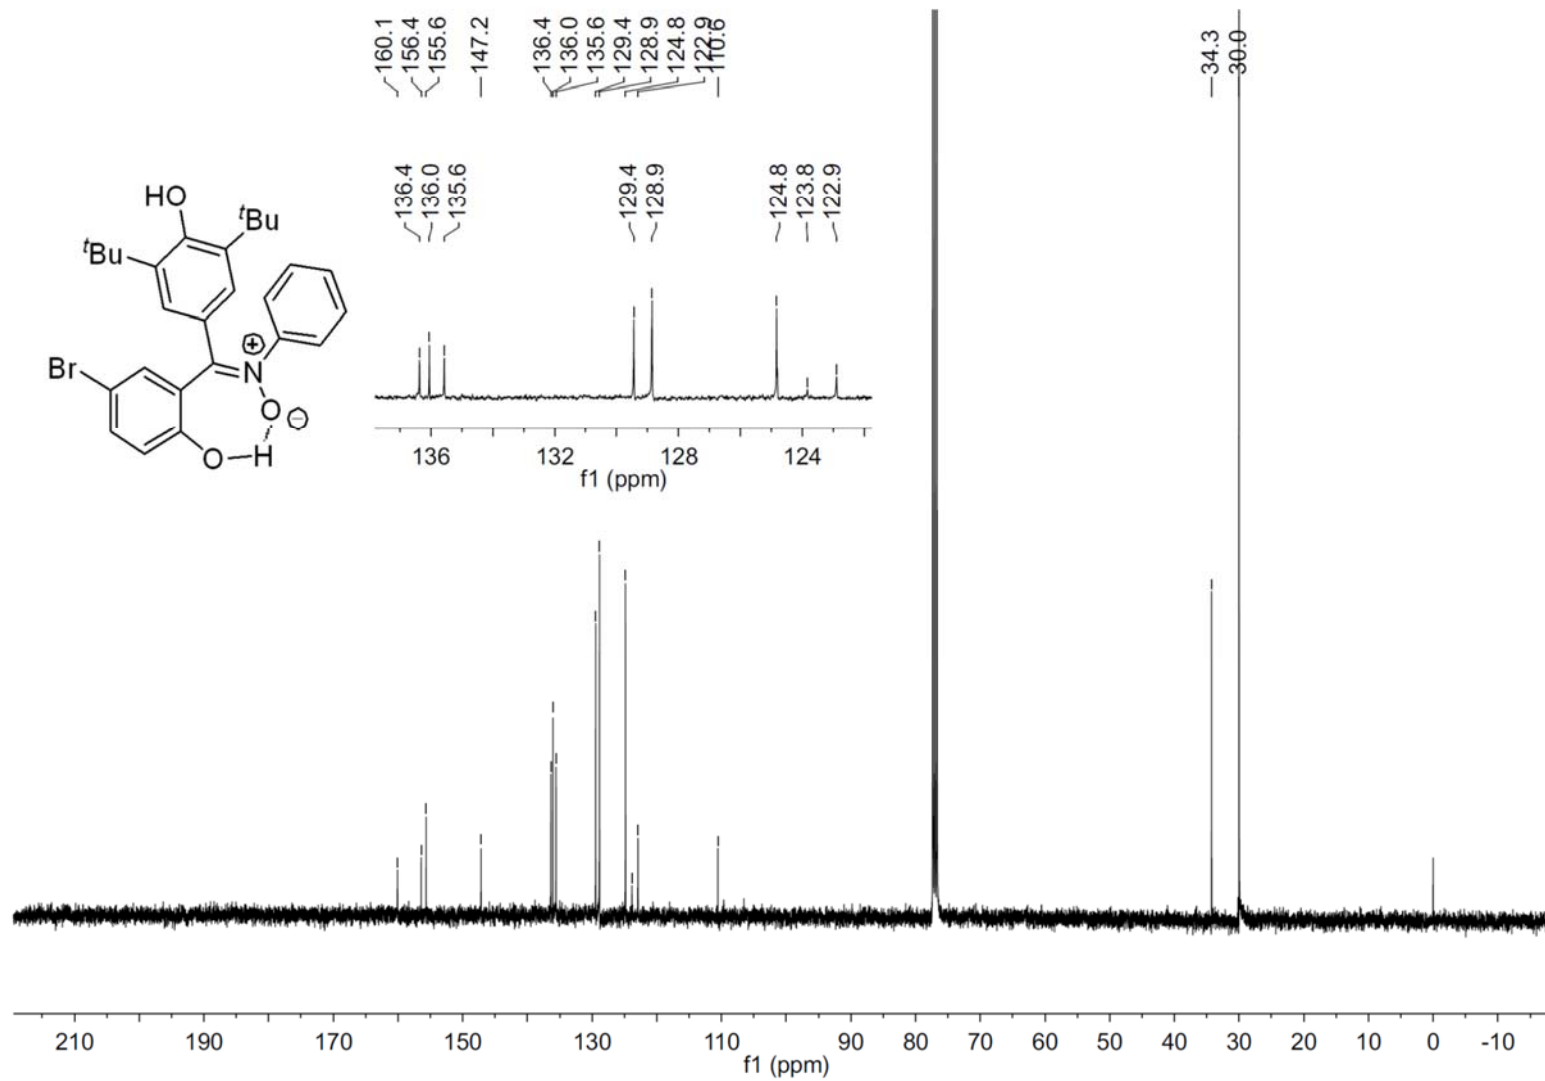

<sup>13</sup>C NMR Spectrum of Compound 3p

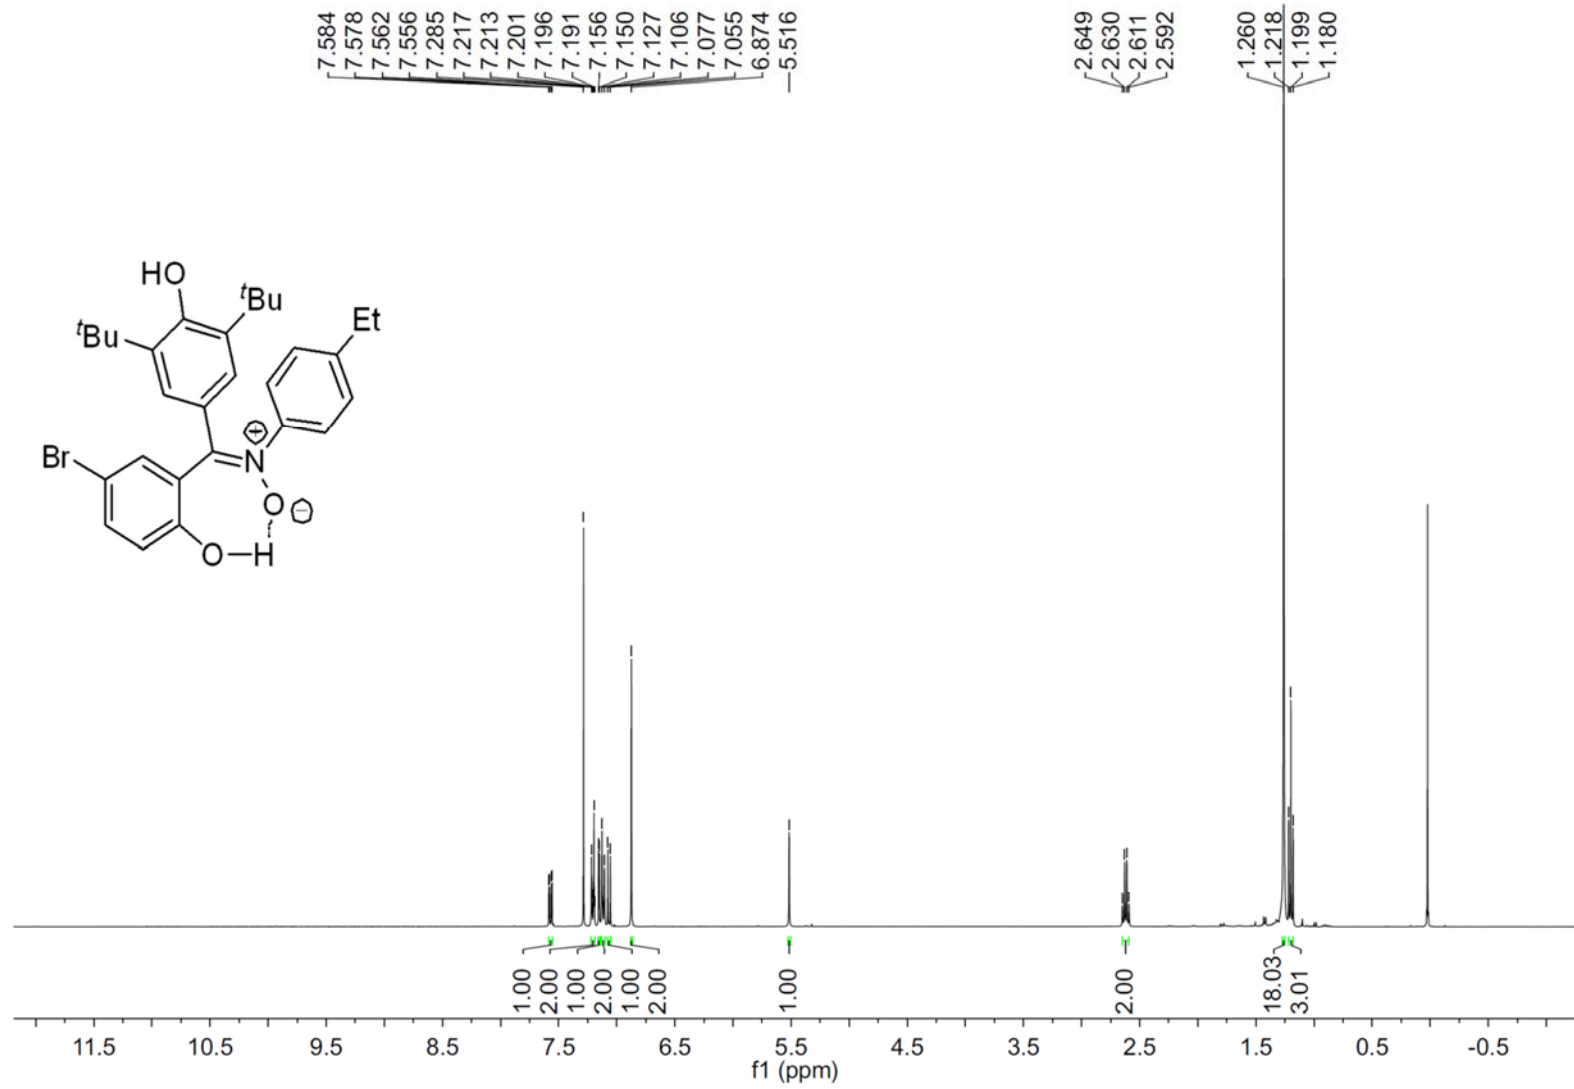

<sup>1</sup>H NMR Spectrum of Compound 3q

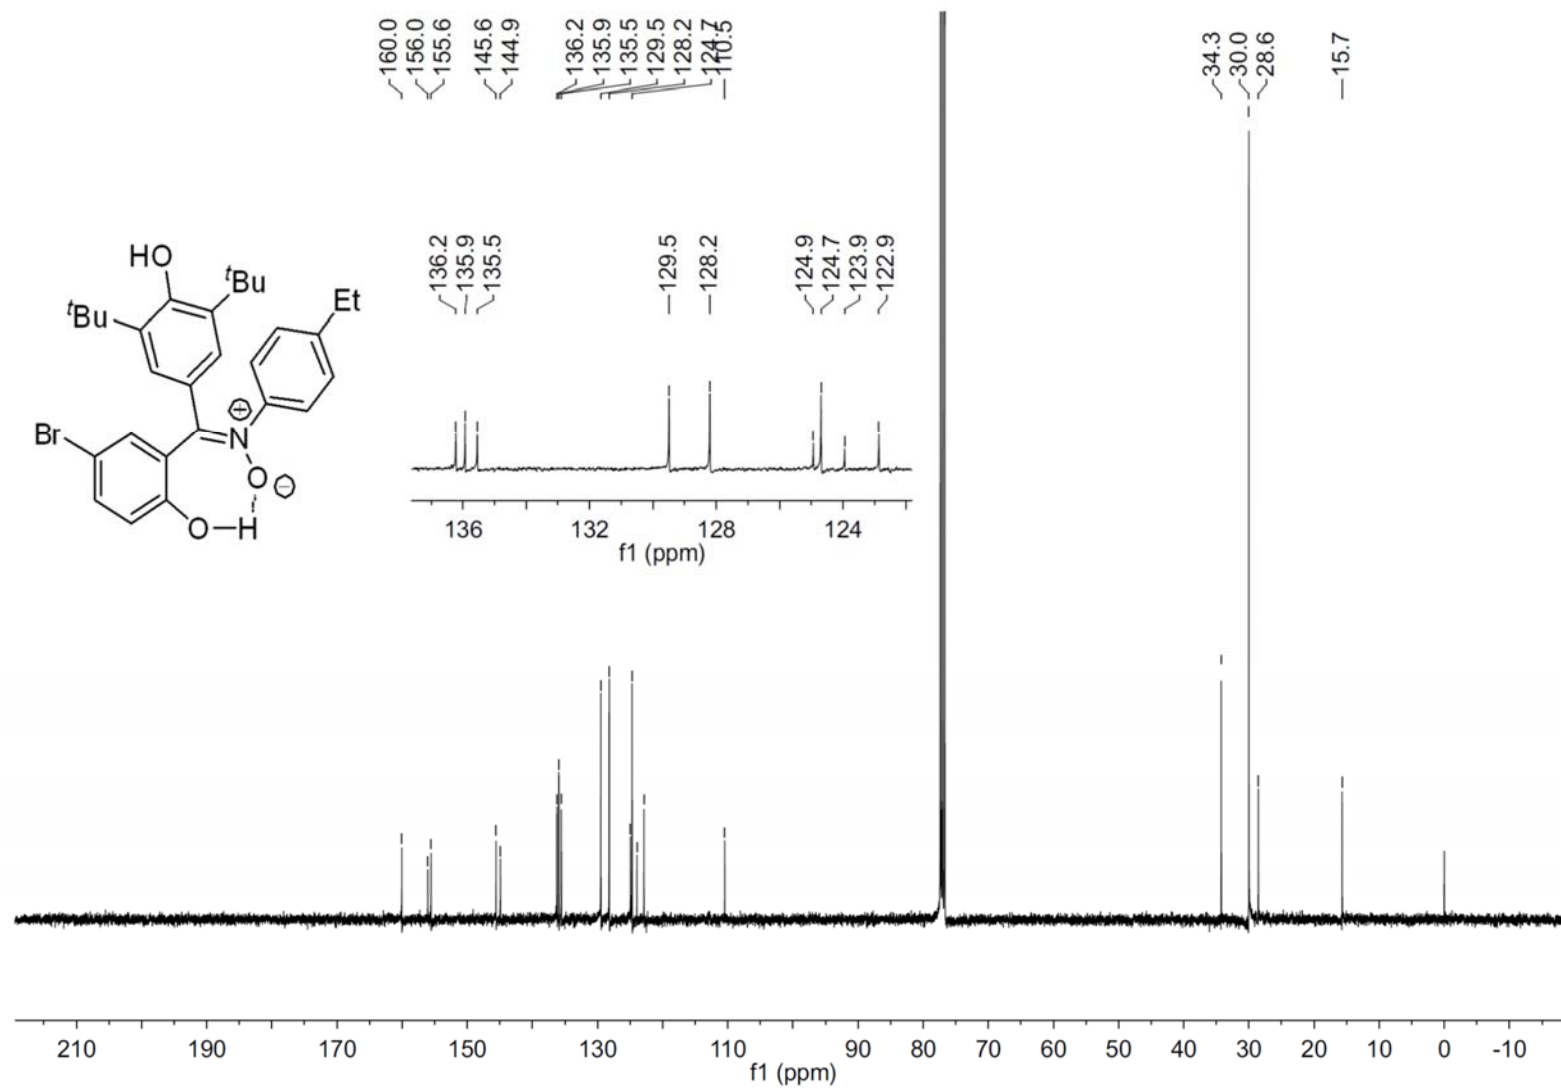

<sup>13</sup>C NMR Spectrum of Compound 3q

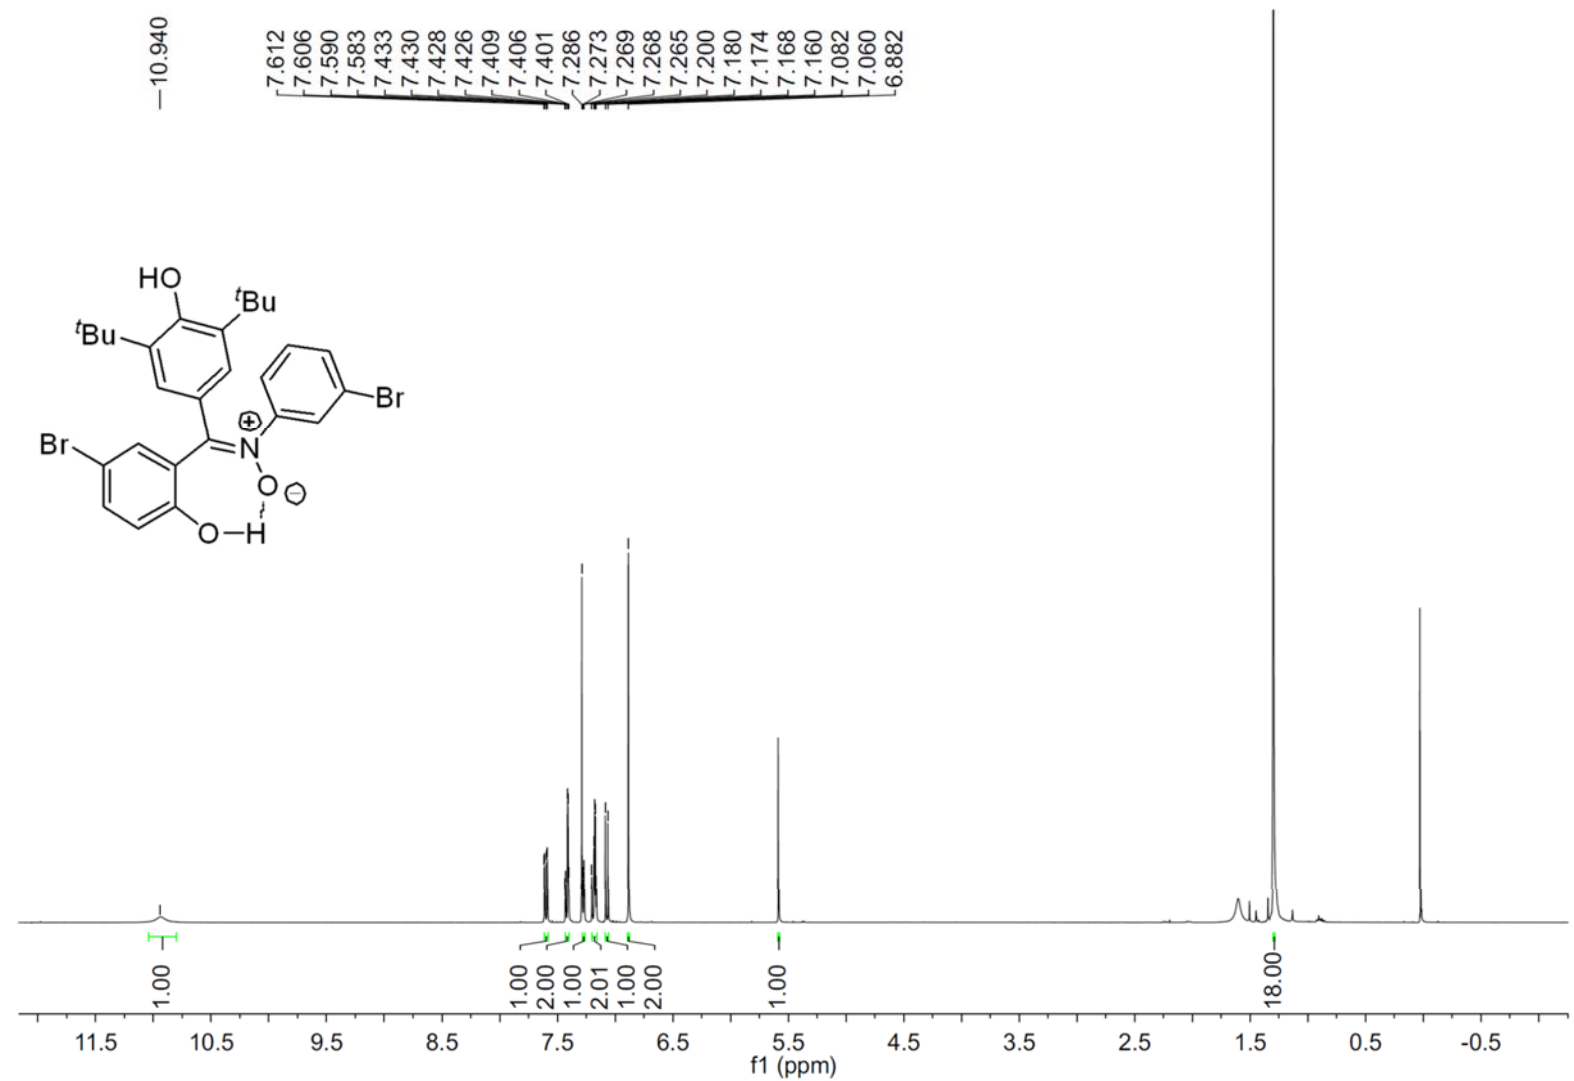

<sup>1</sup>H NMR Spectrum of Compound 3r

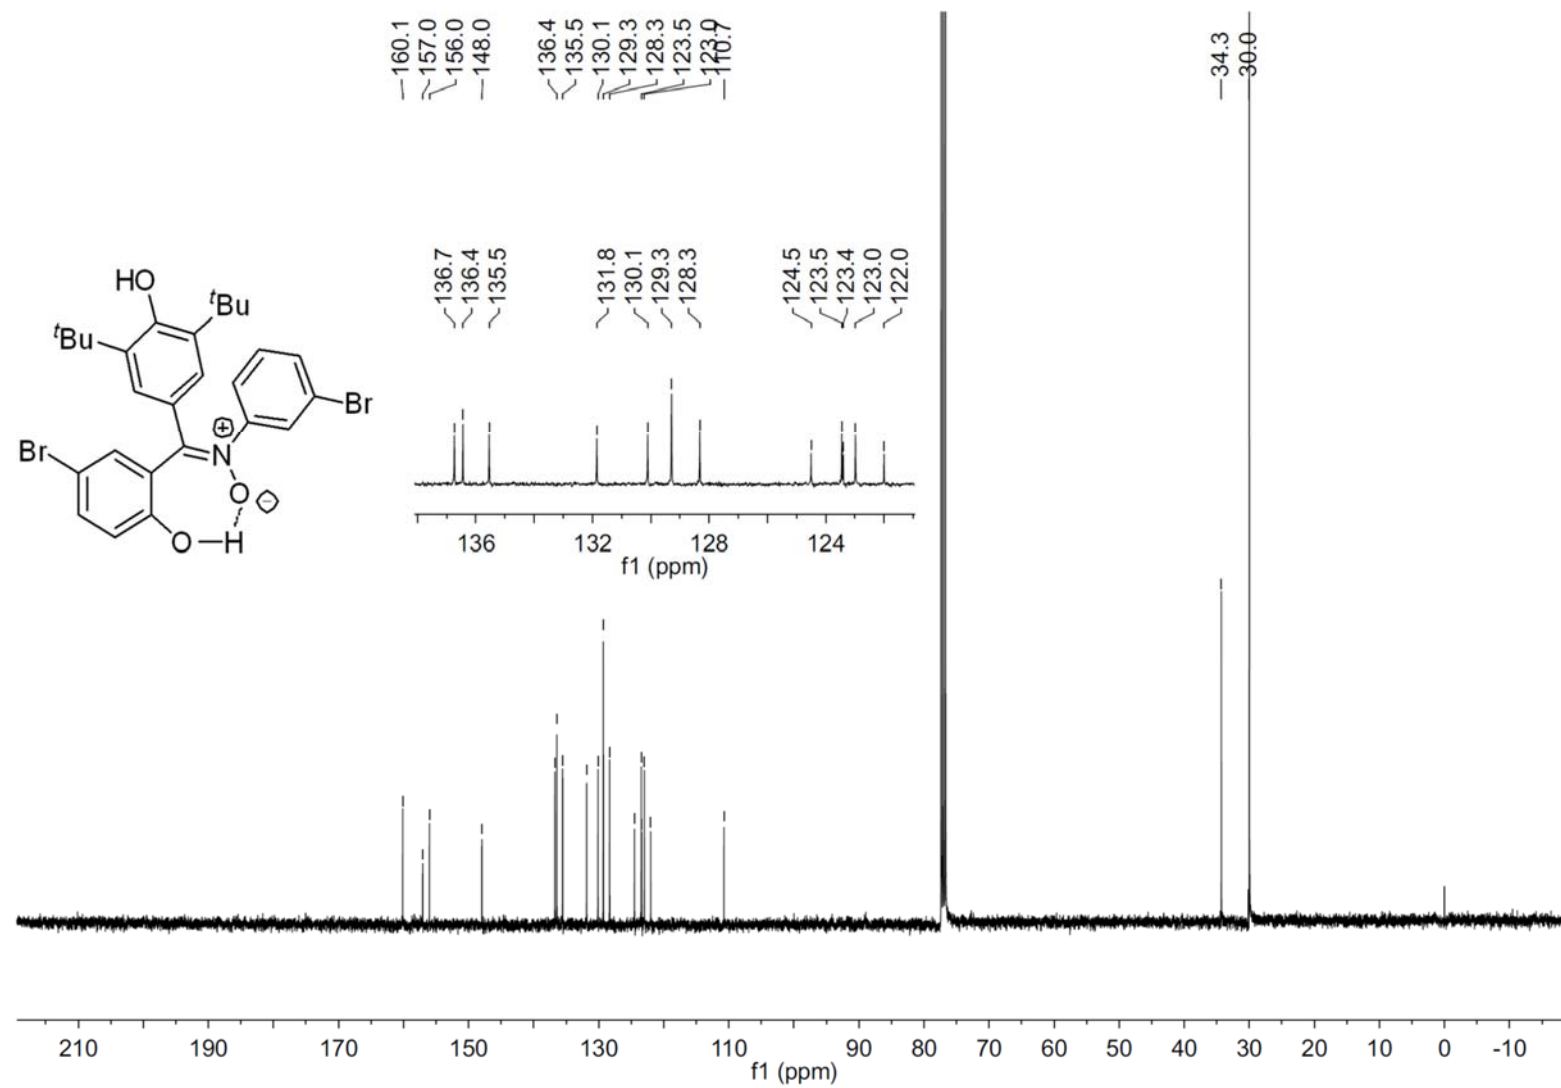

<sup>13</sup>C NMR Spectrum of Compound 3r

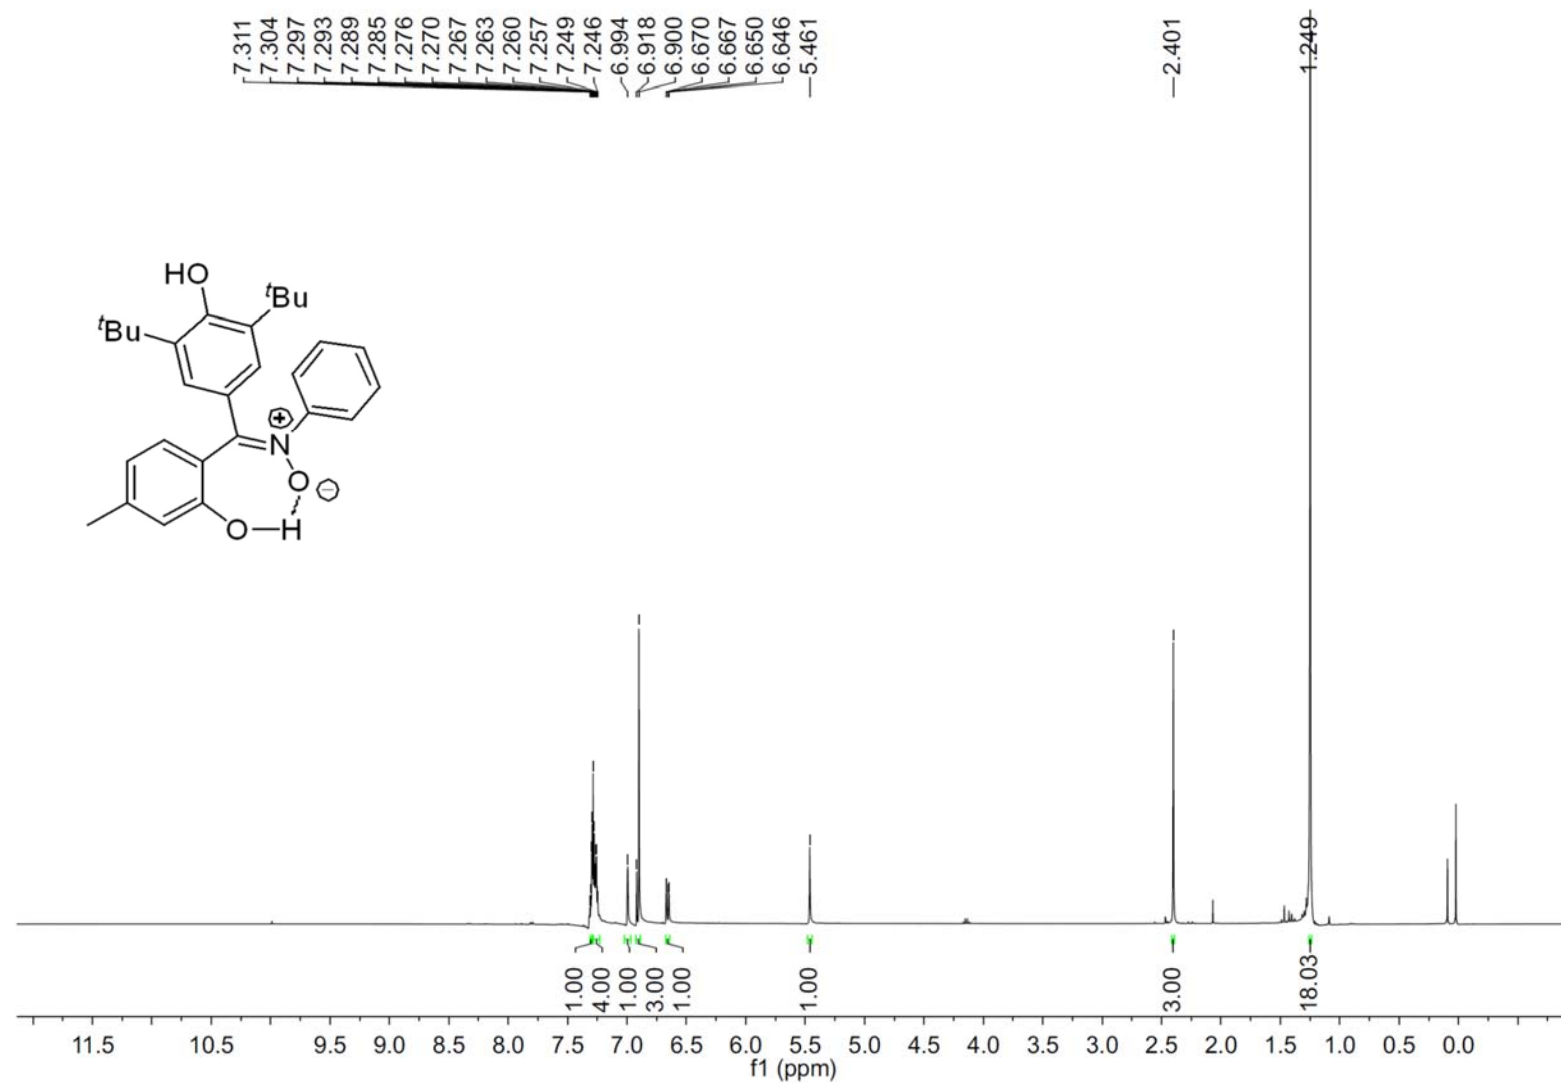

<sup>1</sup>H NMR Spectrum of Compound 3s

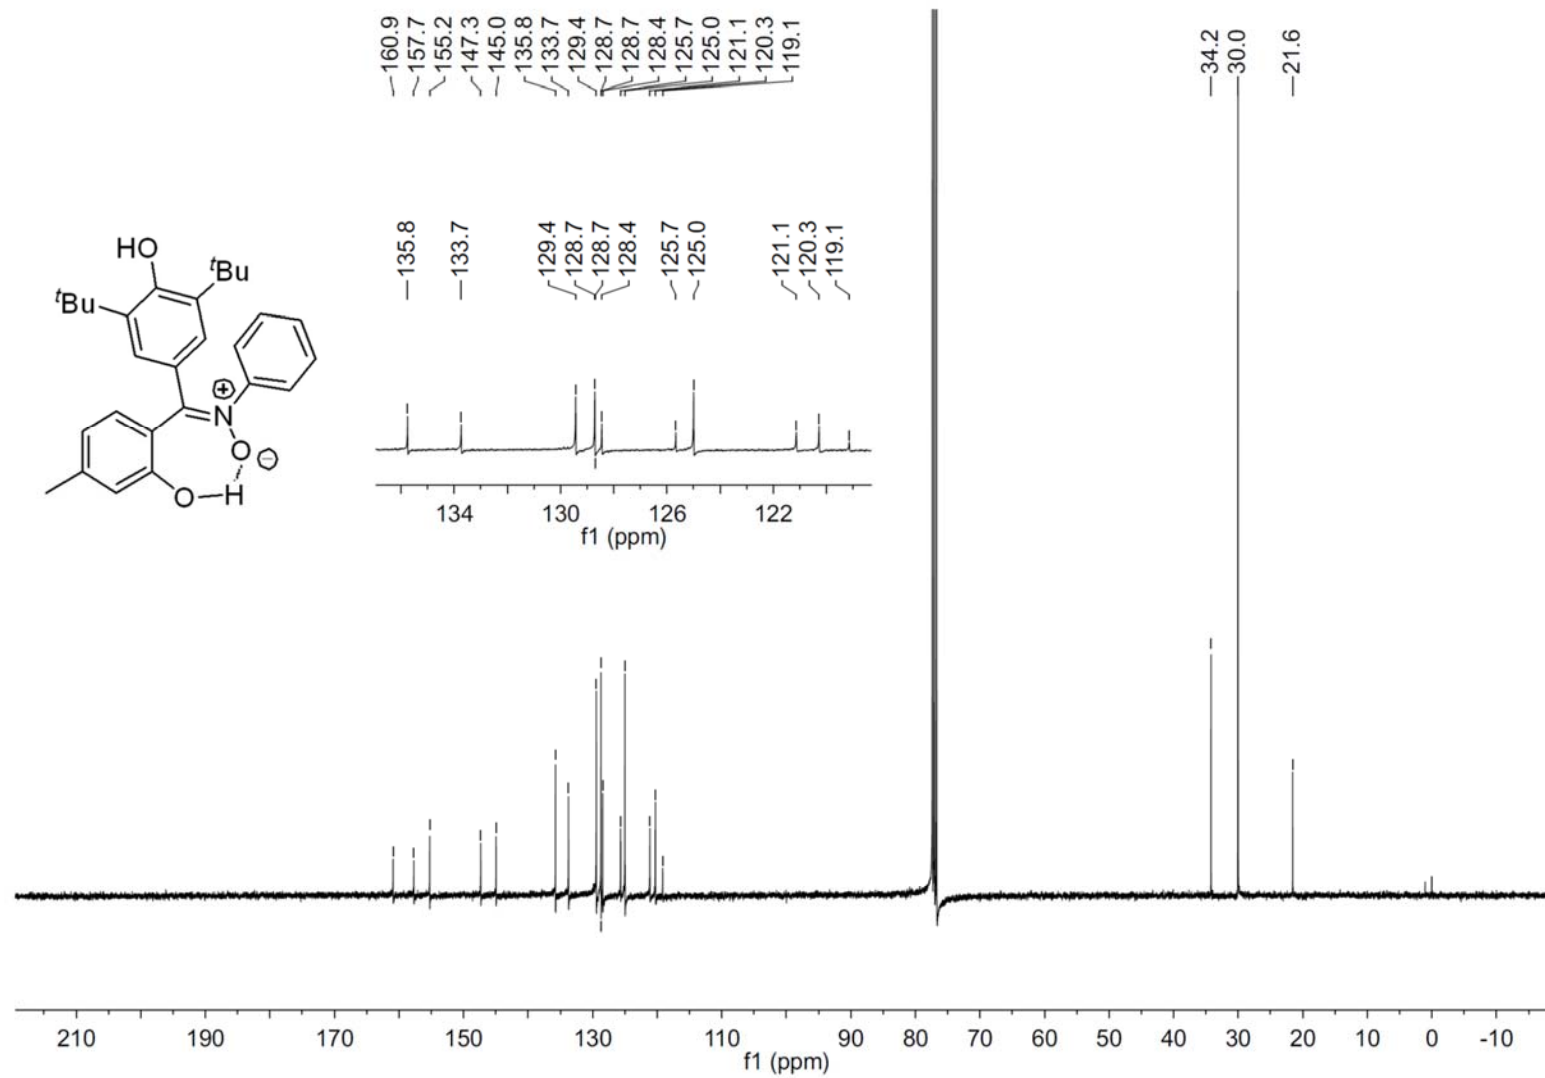

$^{13}\text{C}$  NMR Spectrum of Compound 3s



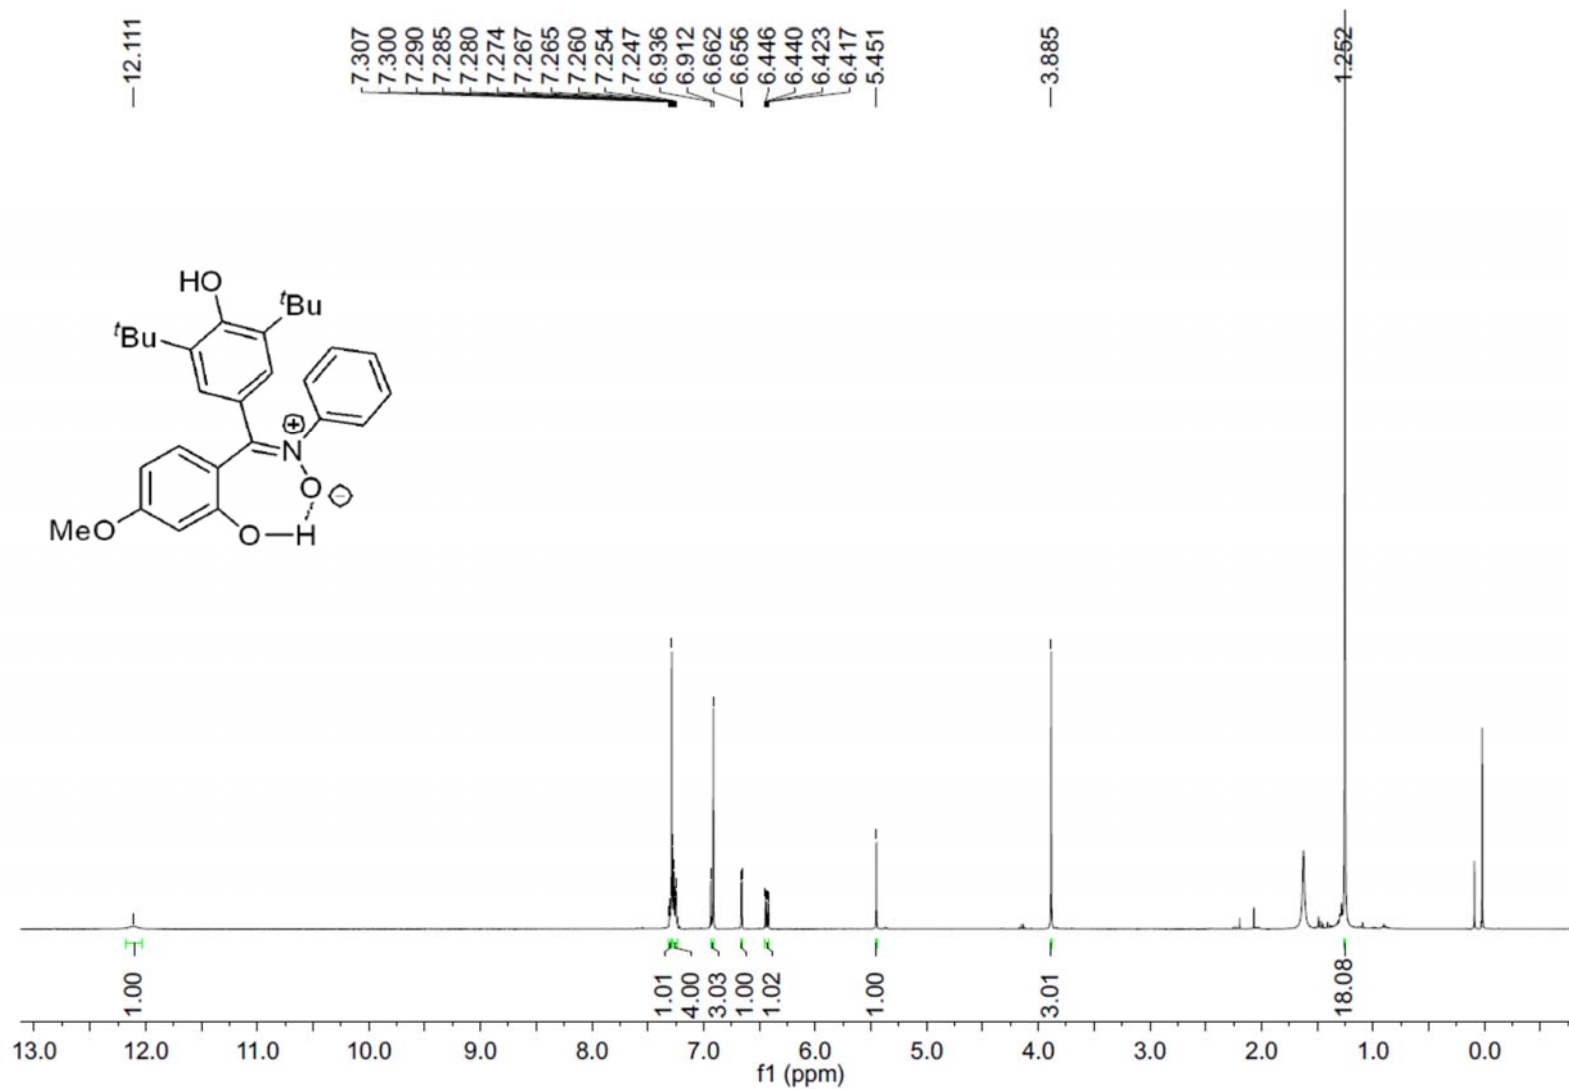

<sup>1</sup>H NMR Spectrum of Compound 3t

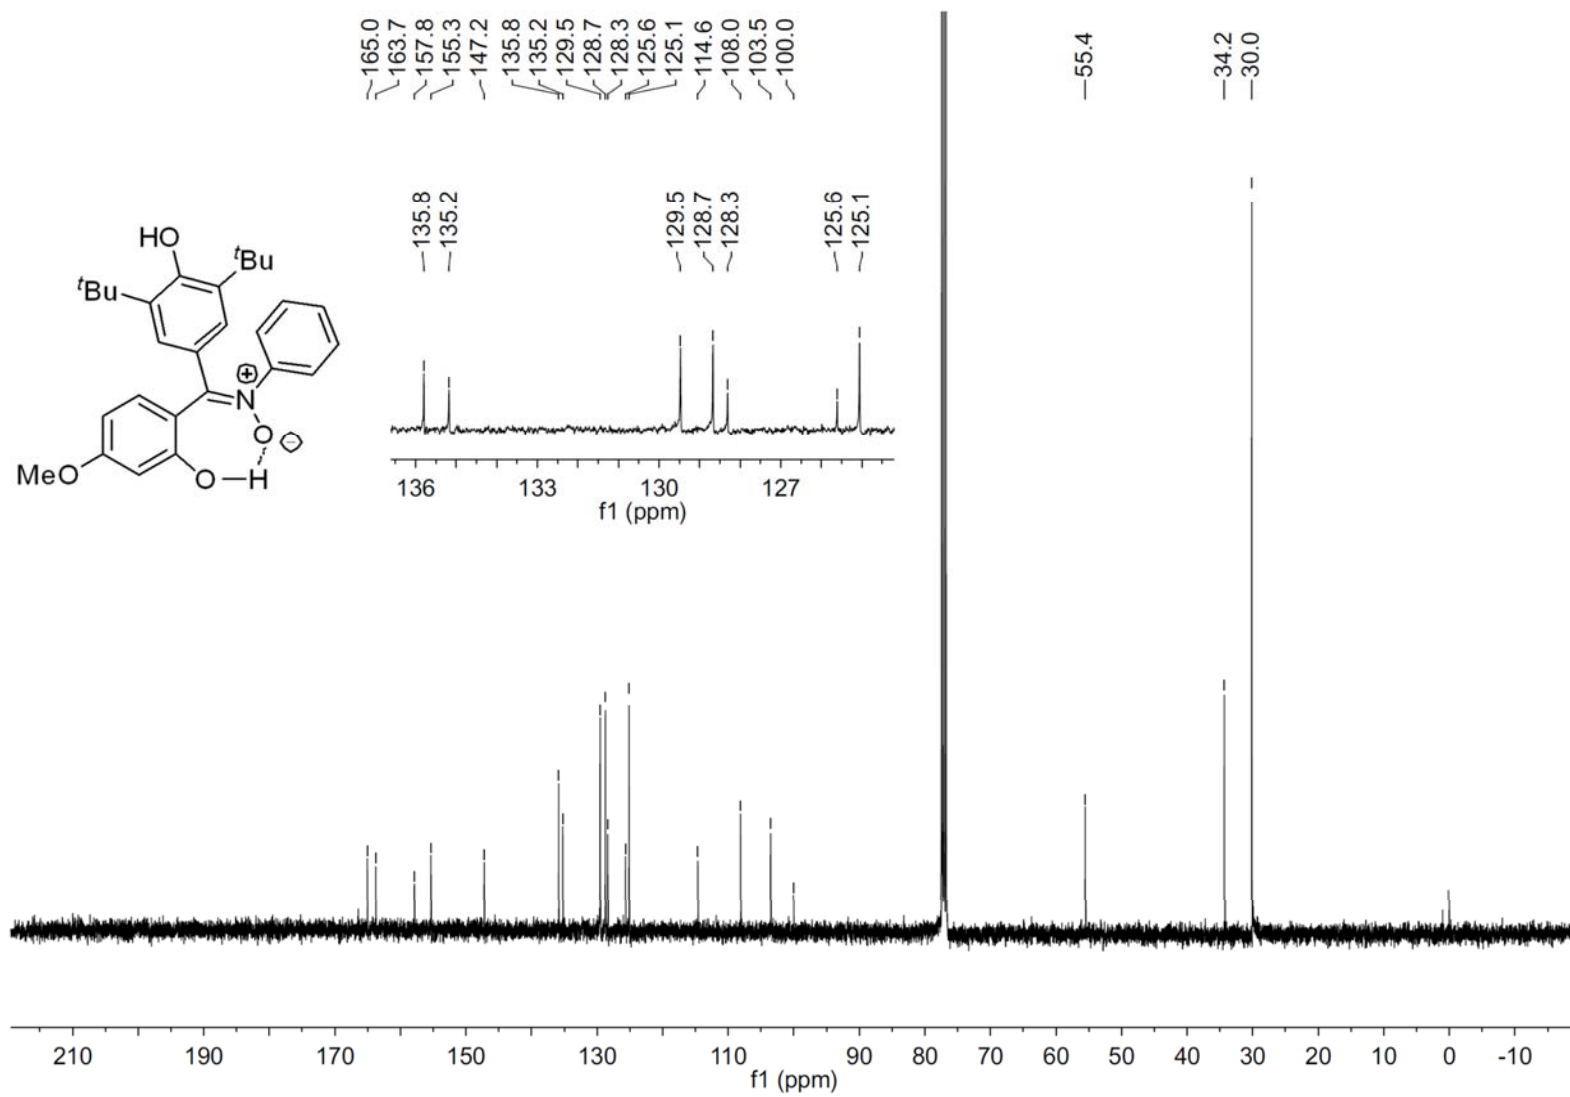

<sup>13</sup>C NMR Spectrum of Compound 3t

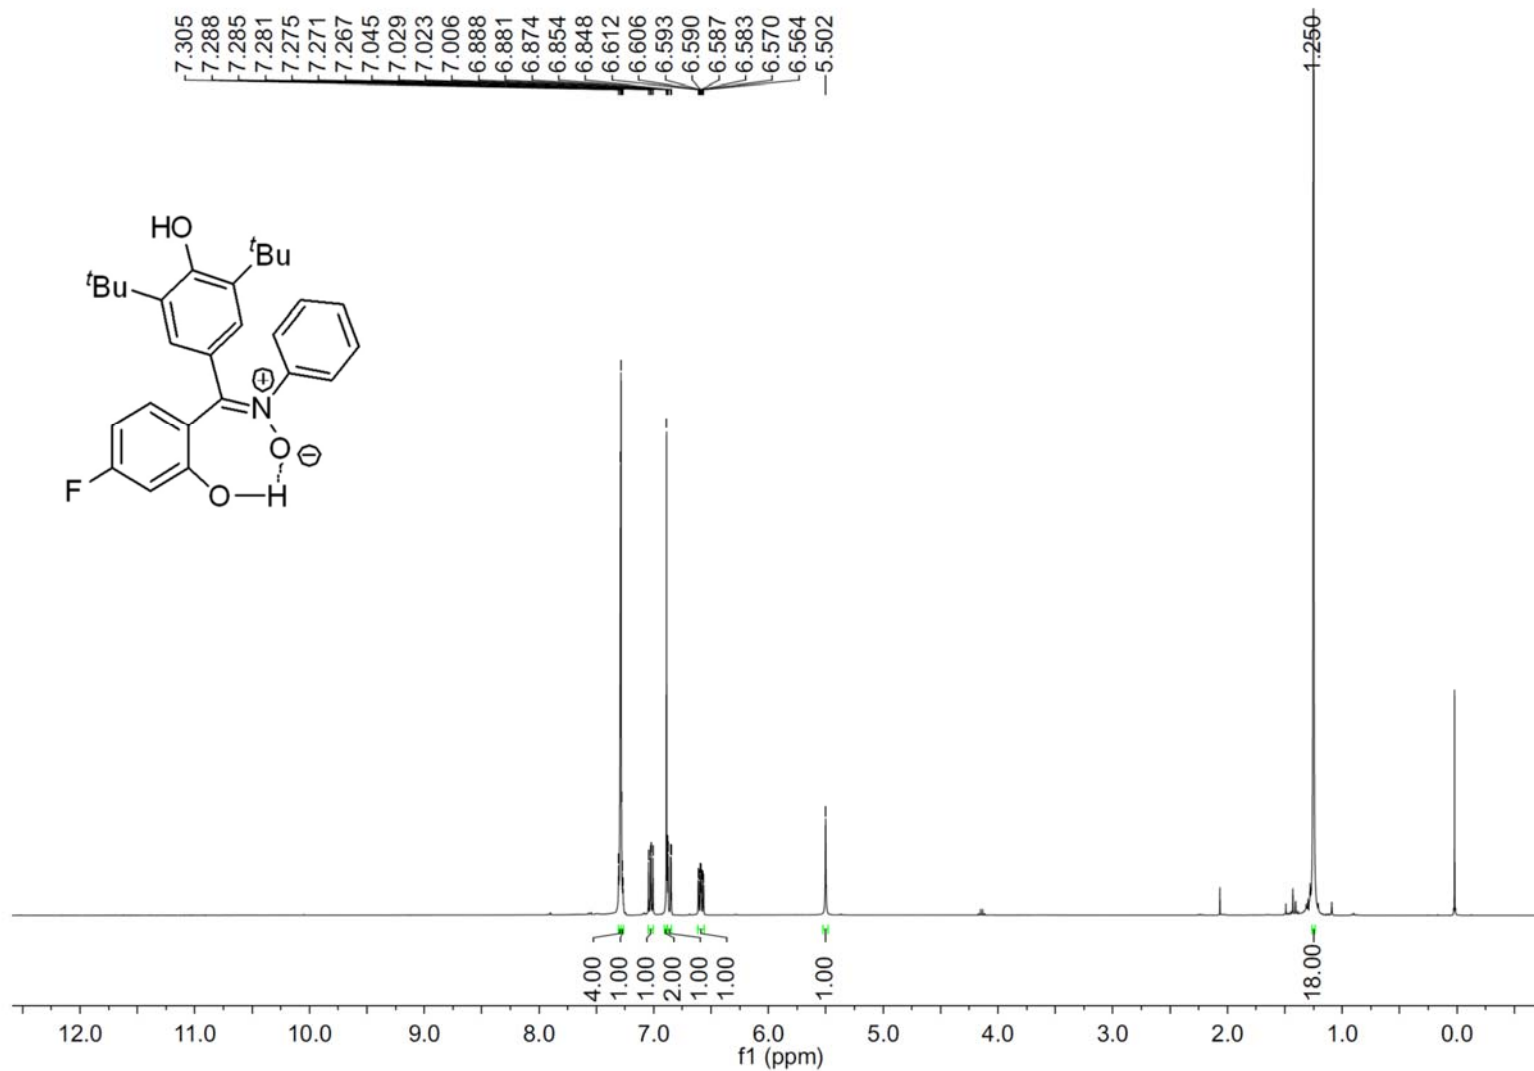

<sup>1</sup>H NMR Spectrum of Compound 3u

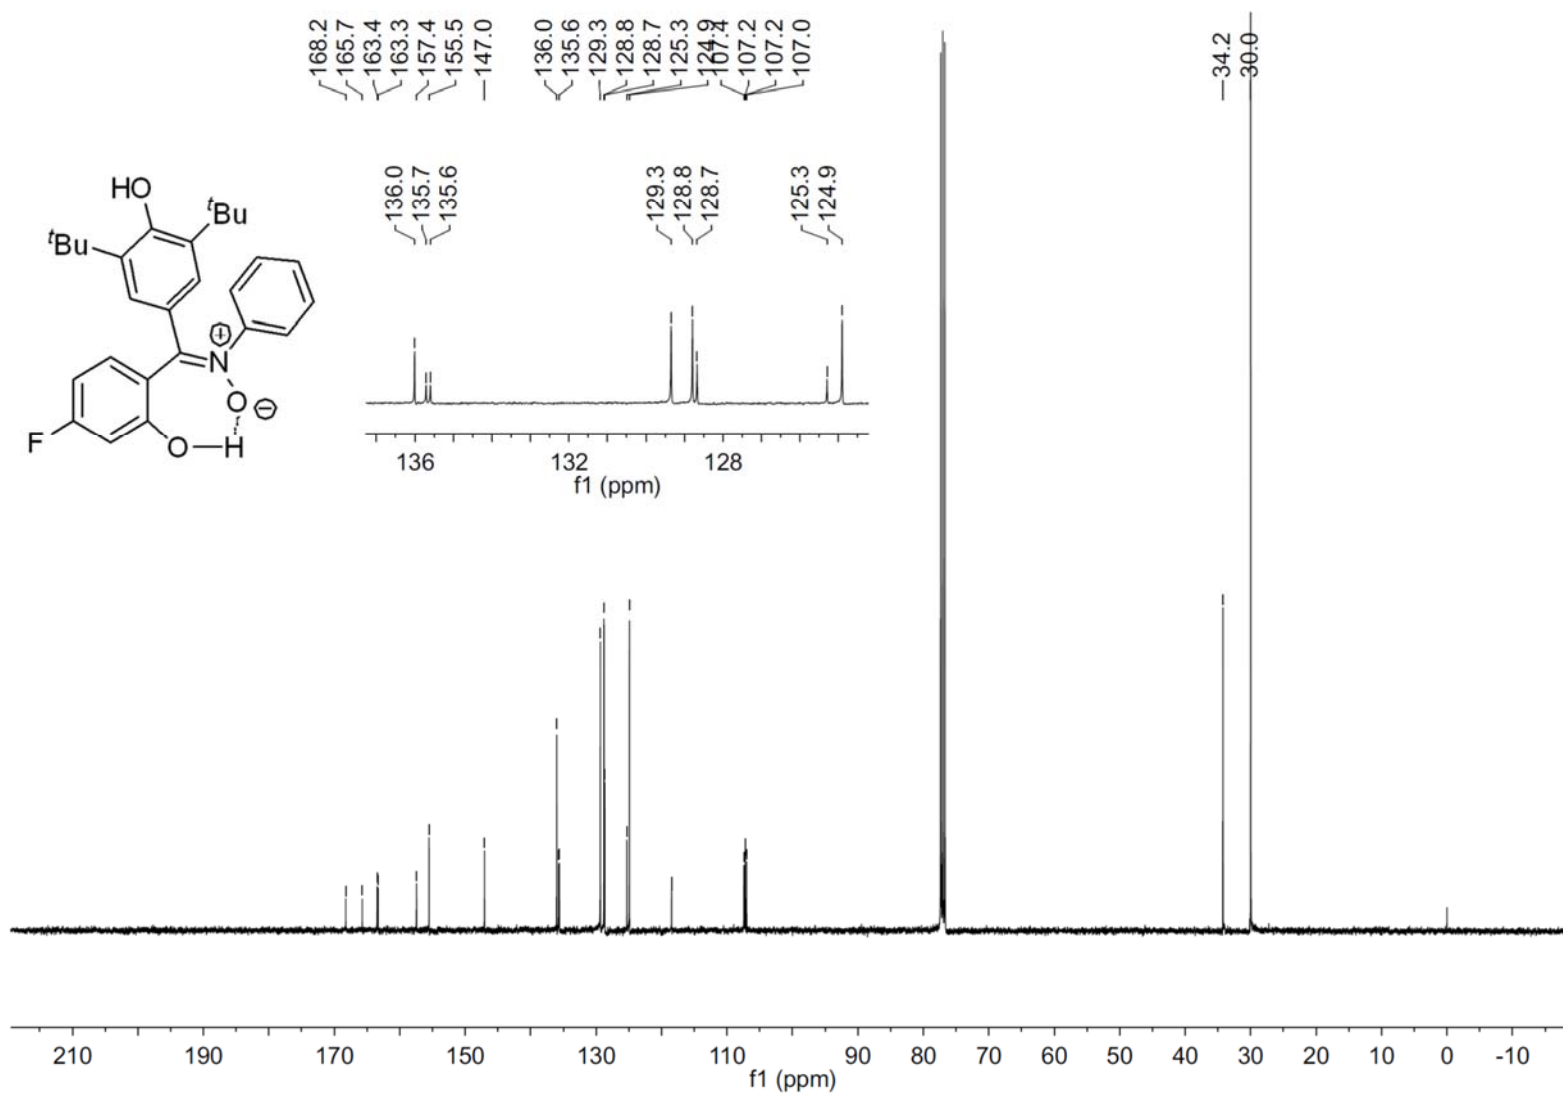

**<sup>13</sup>C NMR Spectrum of Compound 3u**

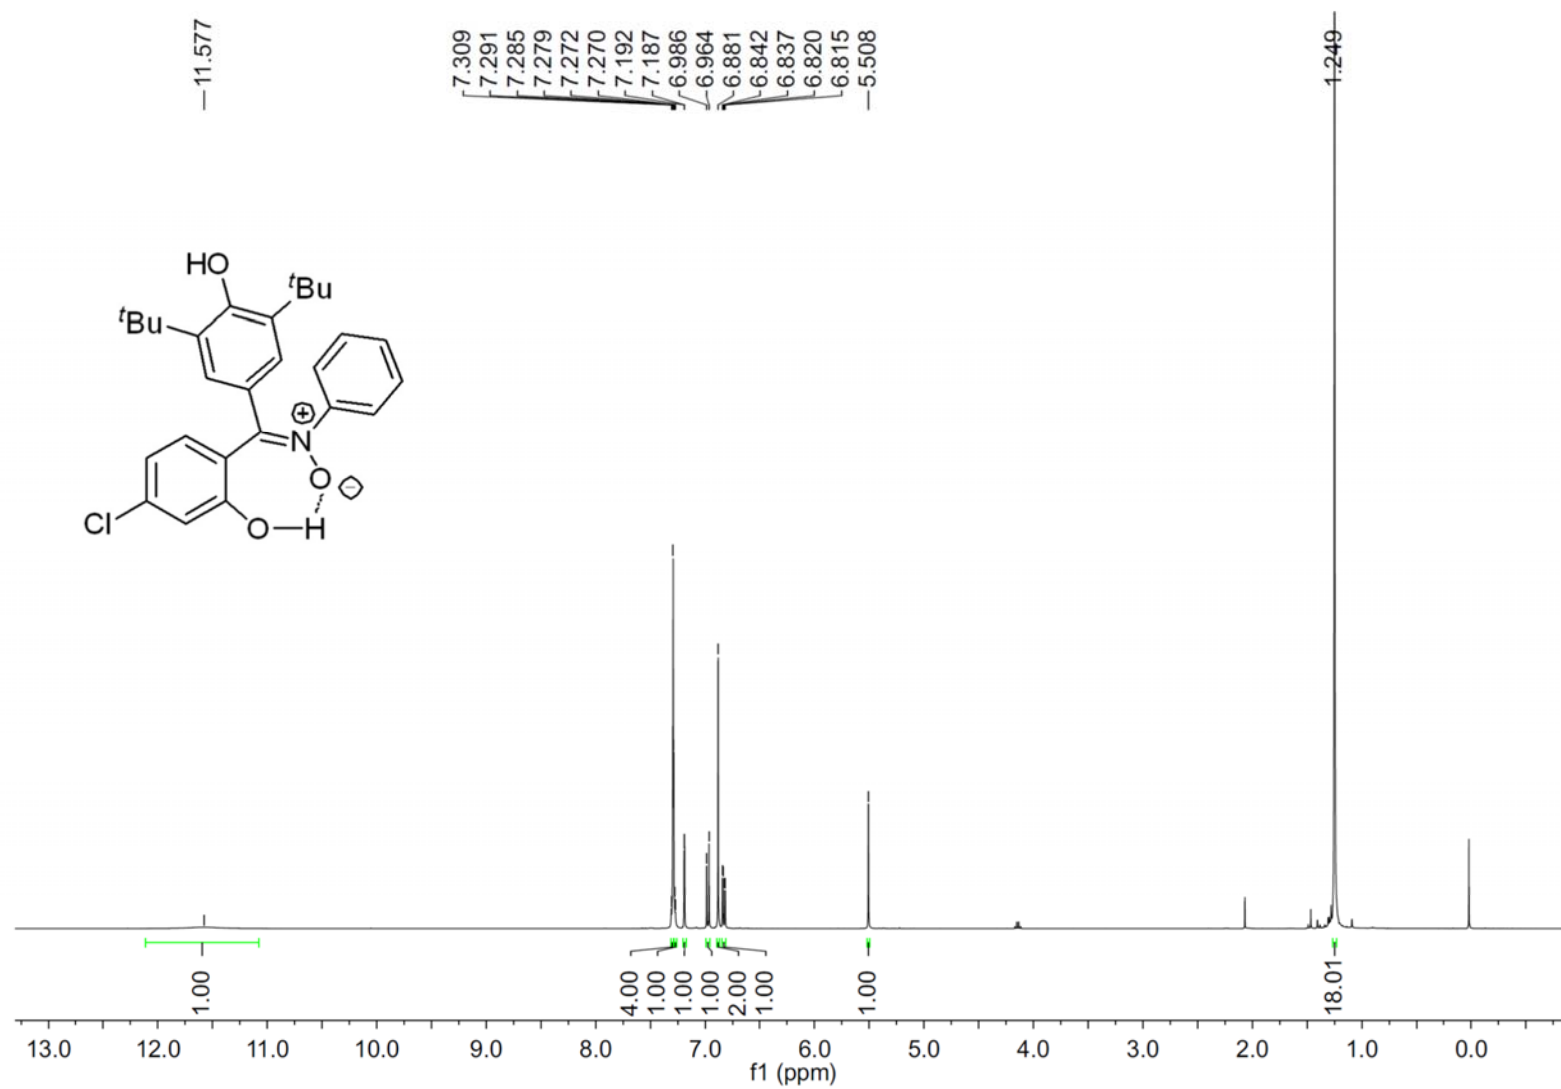

<sup>1</sup>H NMR Spectrum of Compound 3v

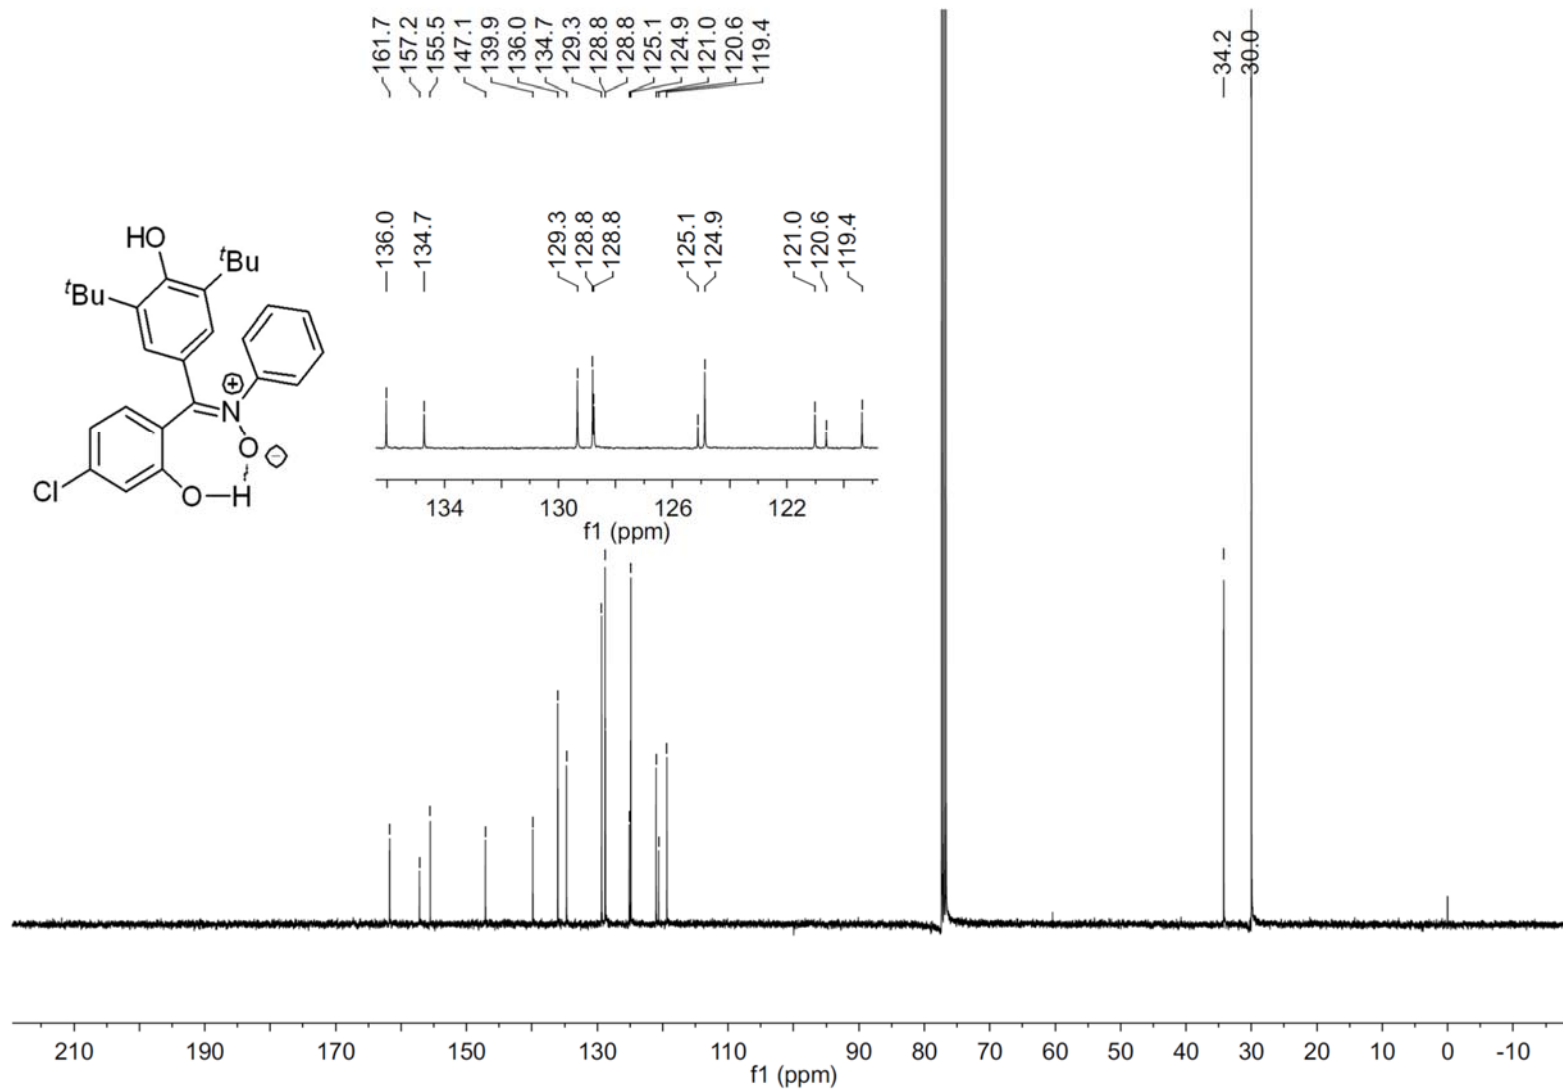

<sup>13</sup>C NMR Spectrum of Compound 3v

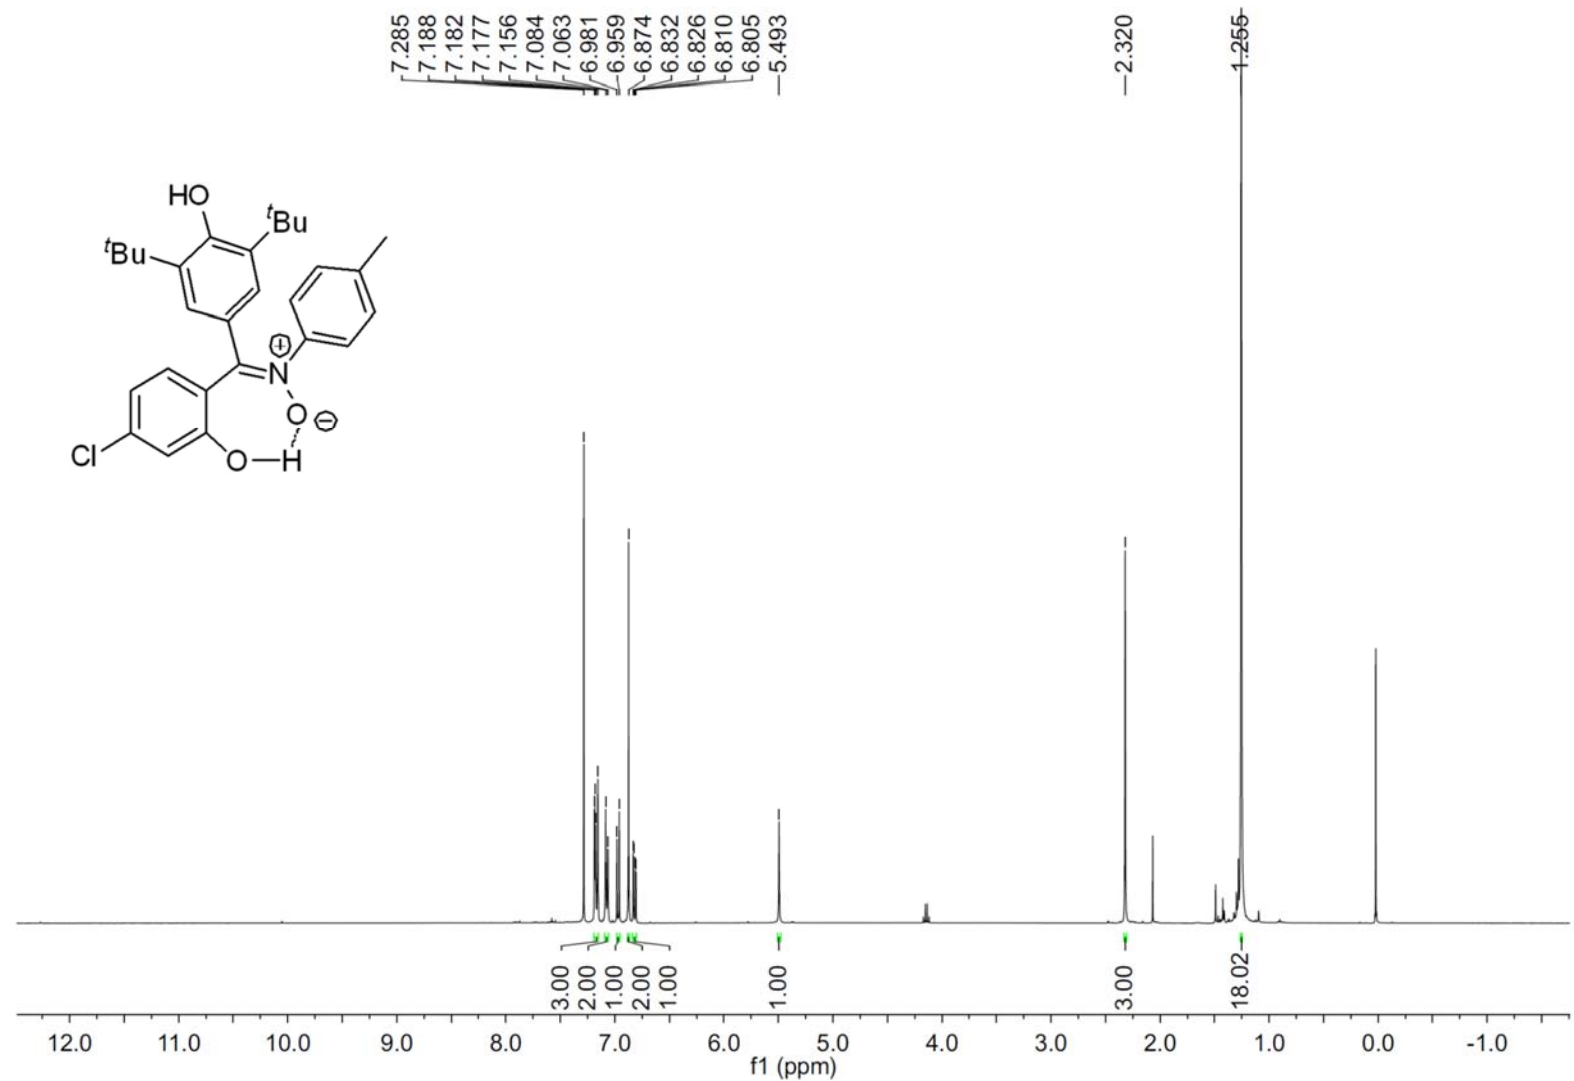

<sup>1</sup>H NMR Spectrum of Compound 3w

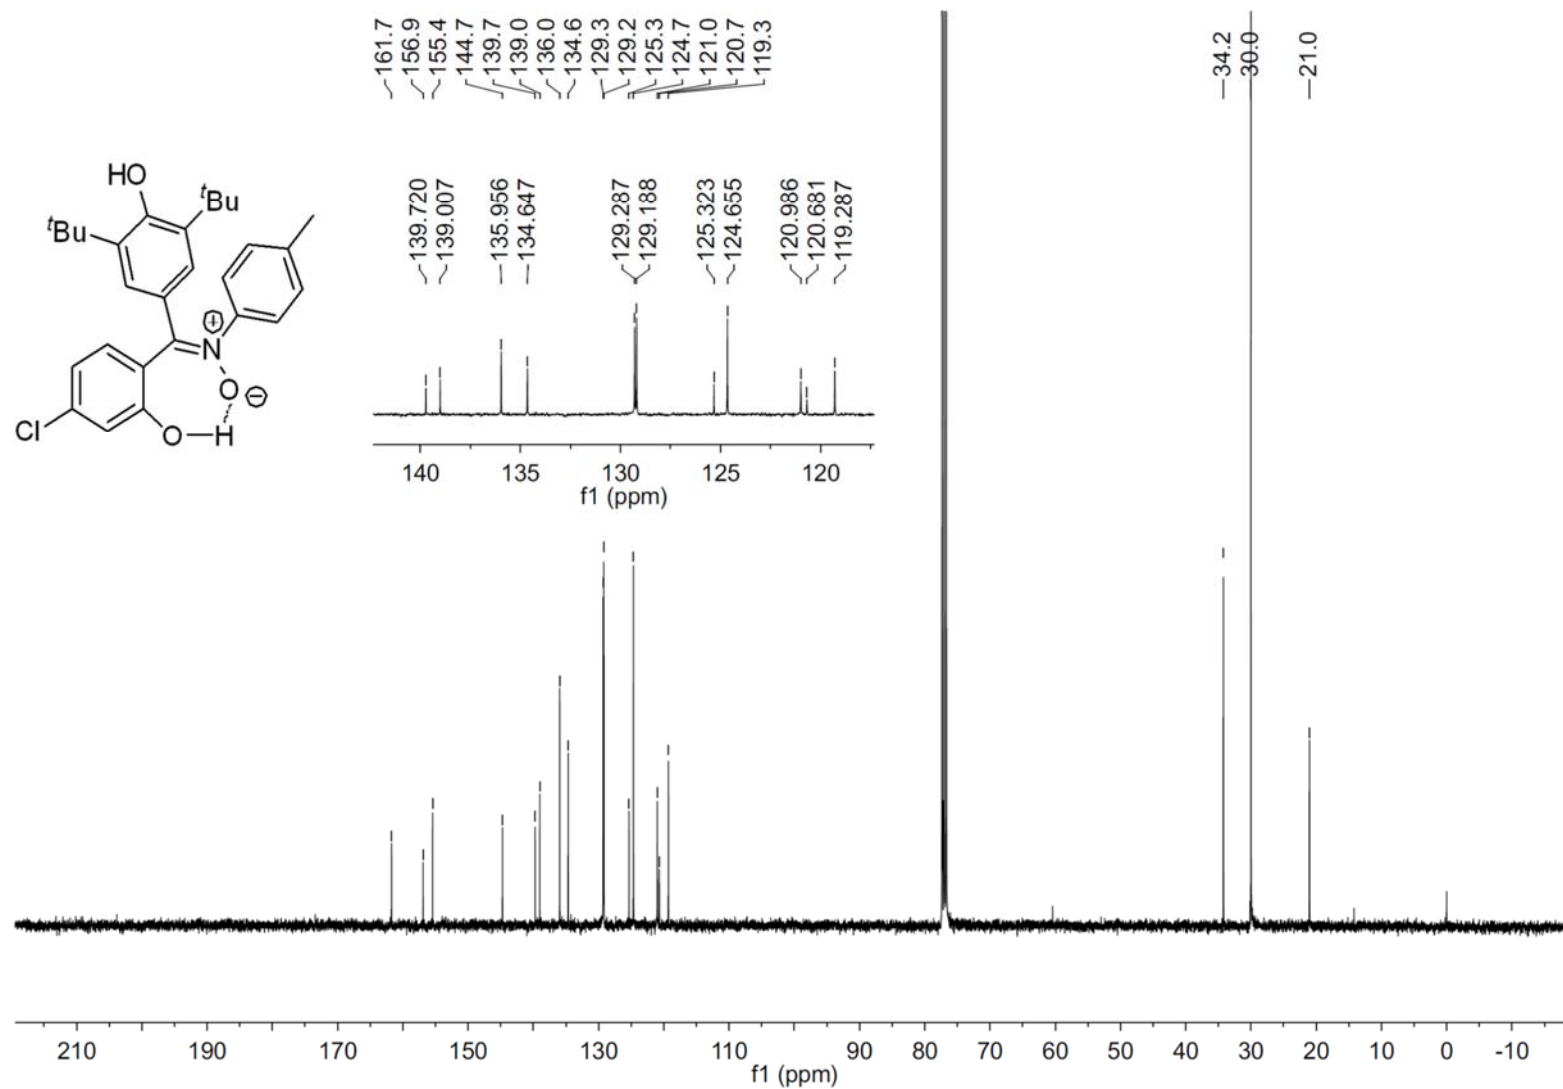

<sup>13</sup>C NMR Spectrum of Compound 3w



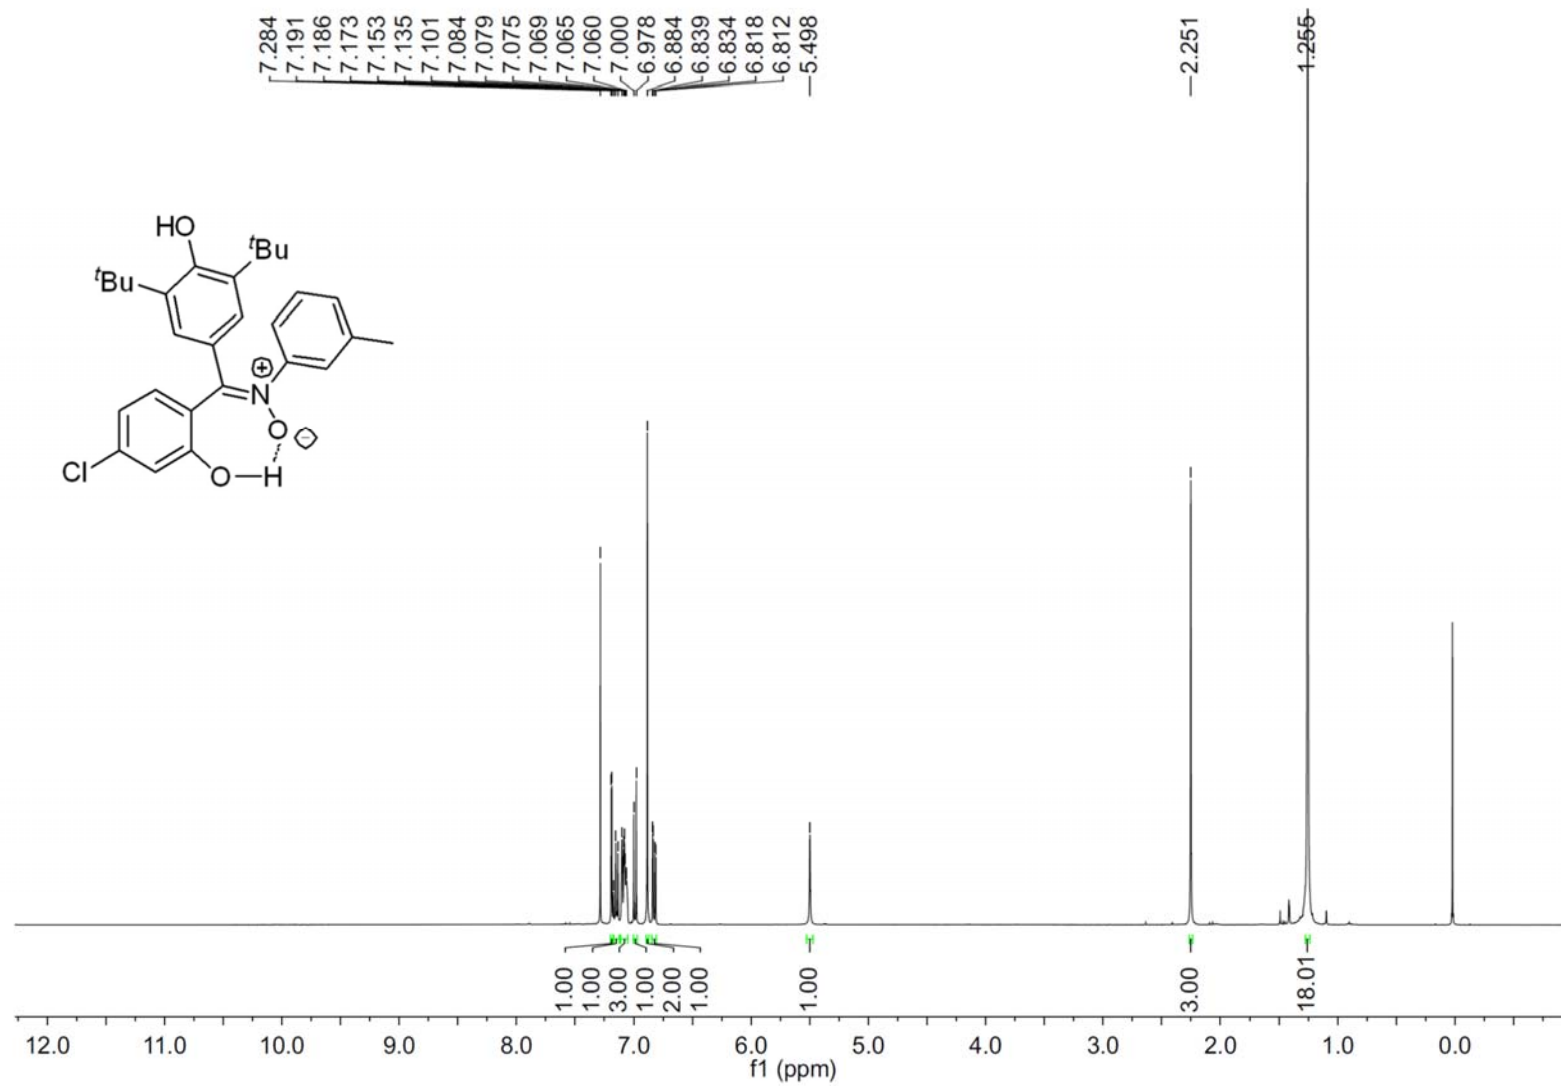

<sup>1</sup>H NMR Spectrum of Compound 3x

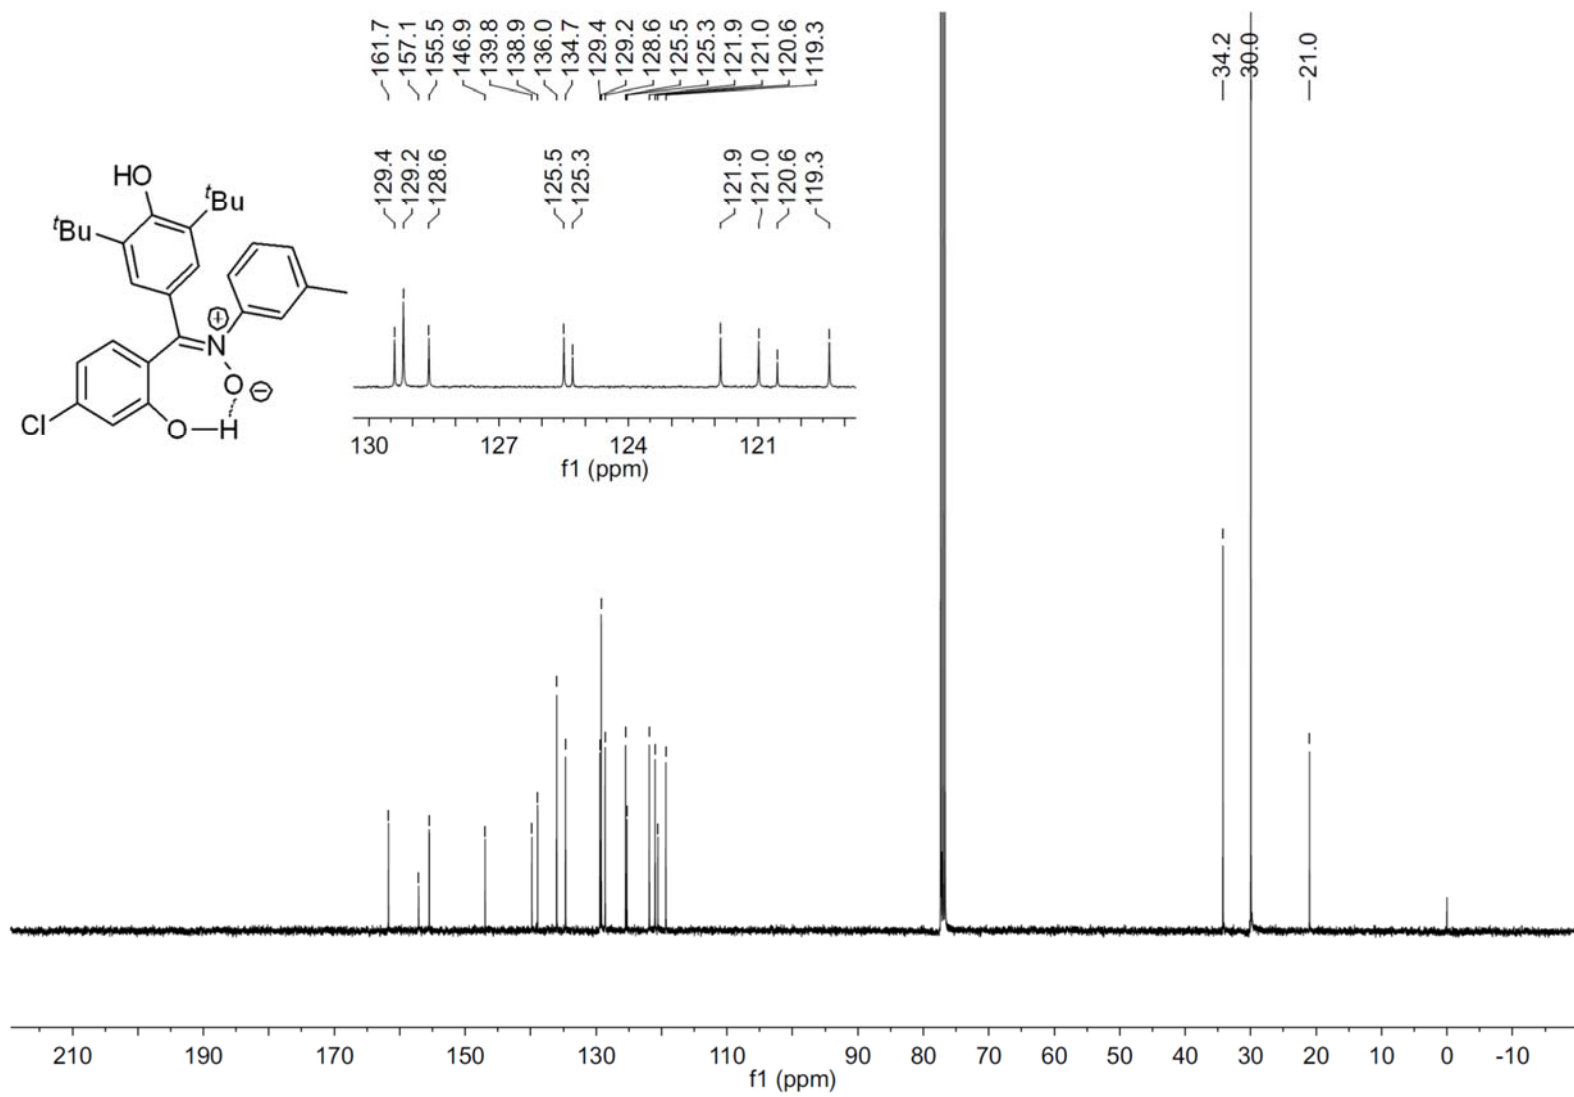

<sup>13</sup>C NMR Spectrum of Compound 3x

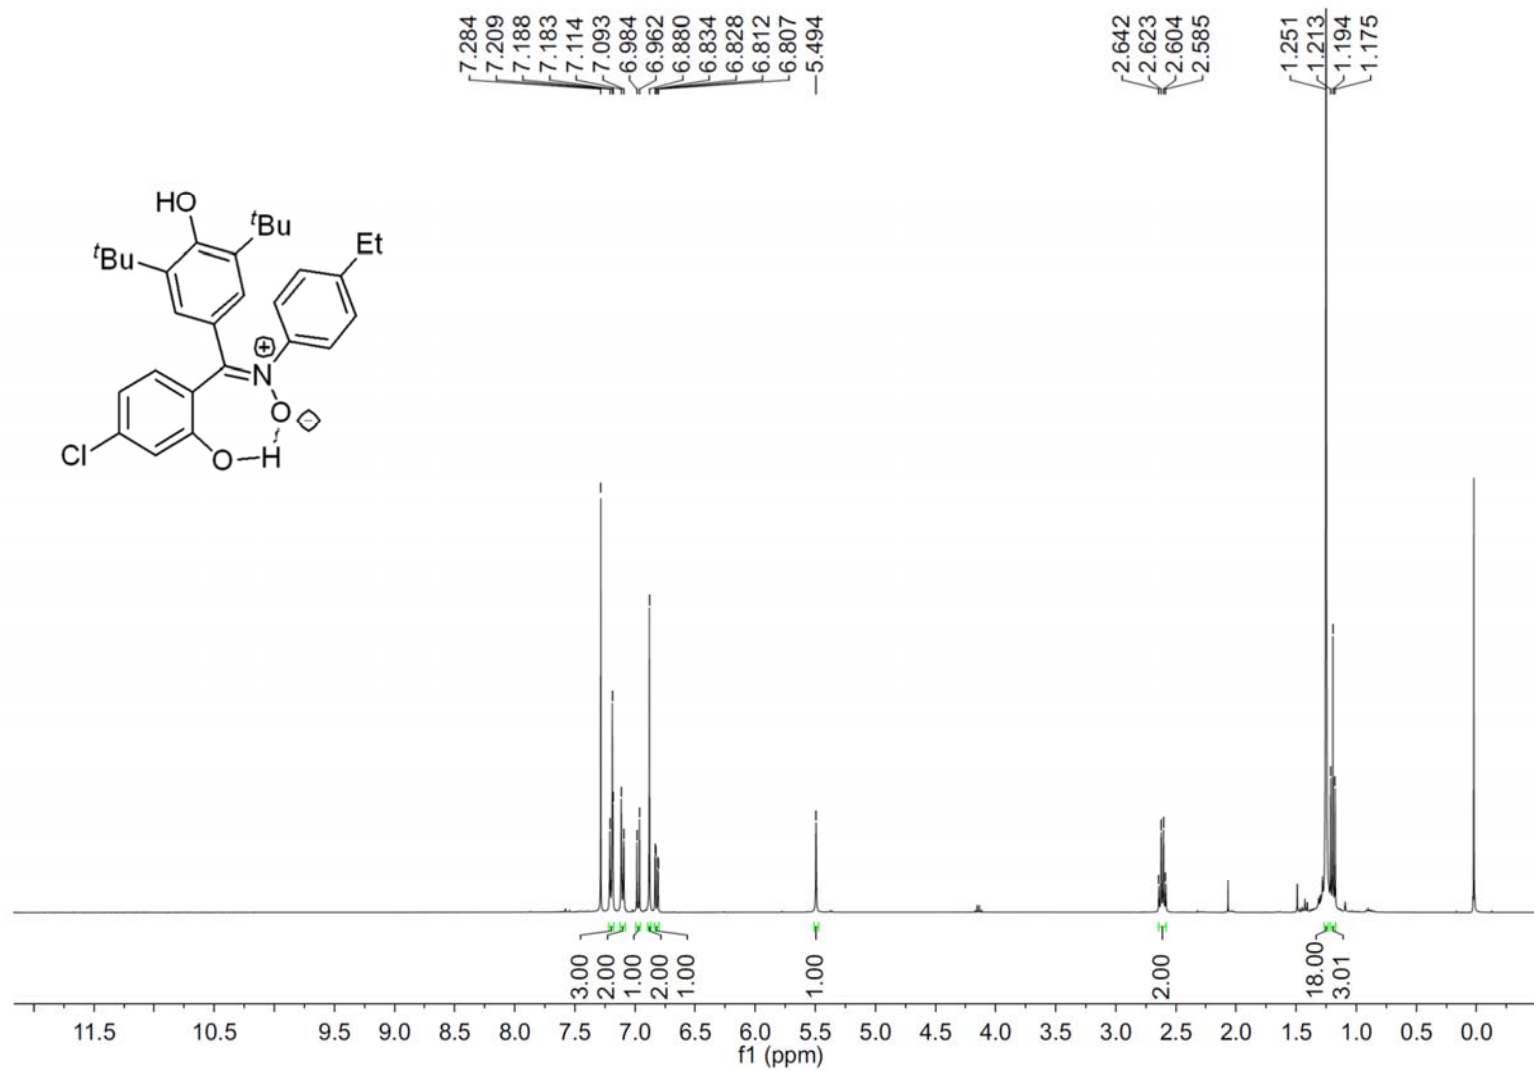

**<sup>1</sup>H NMR Spectrum of Compound 3y**

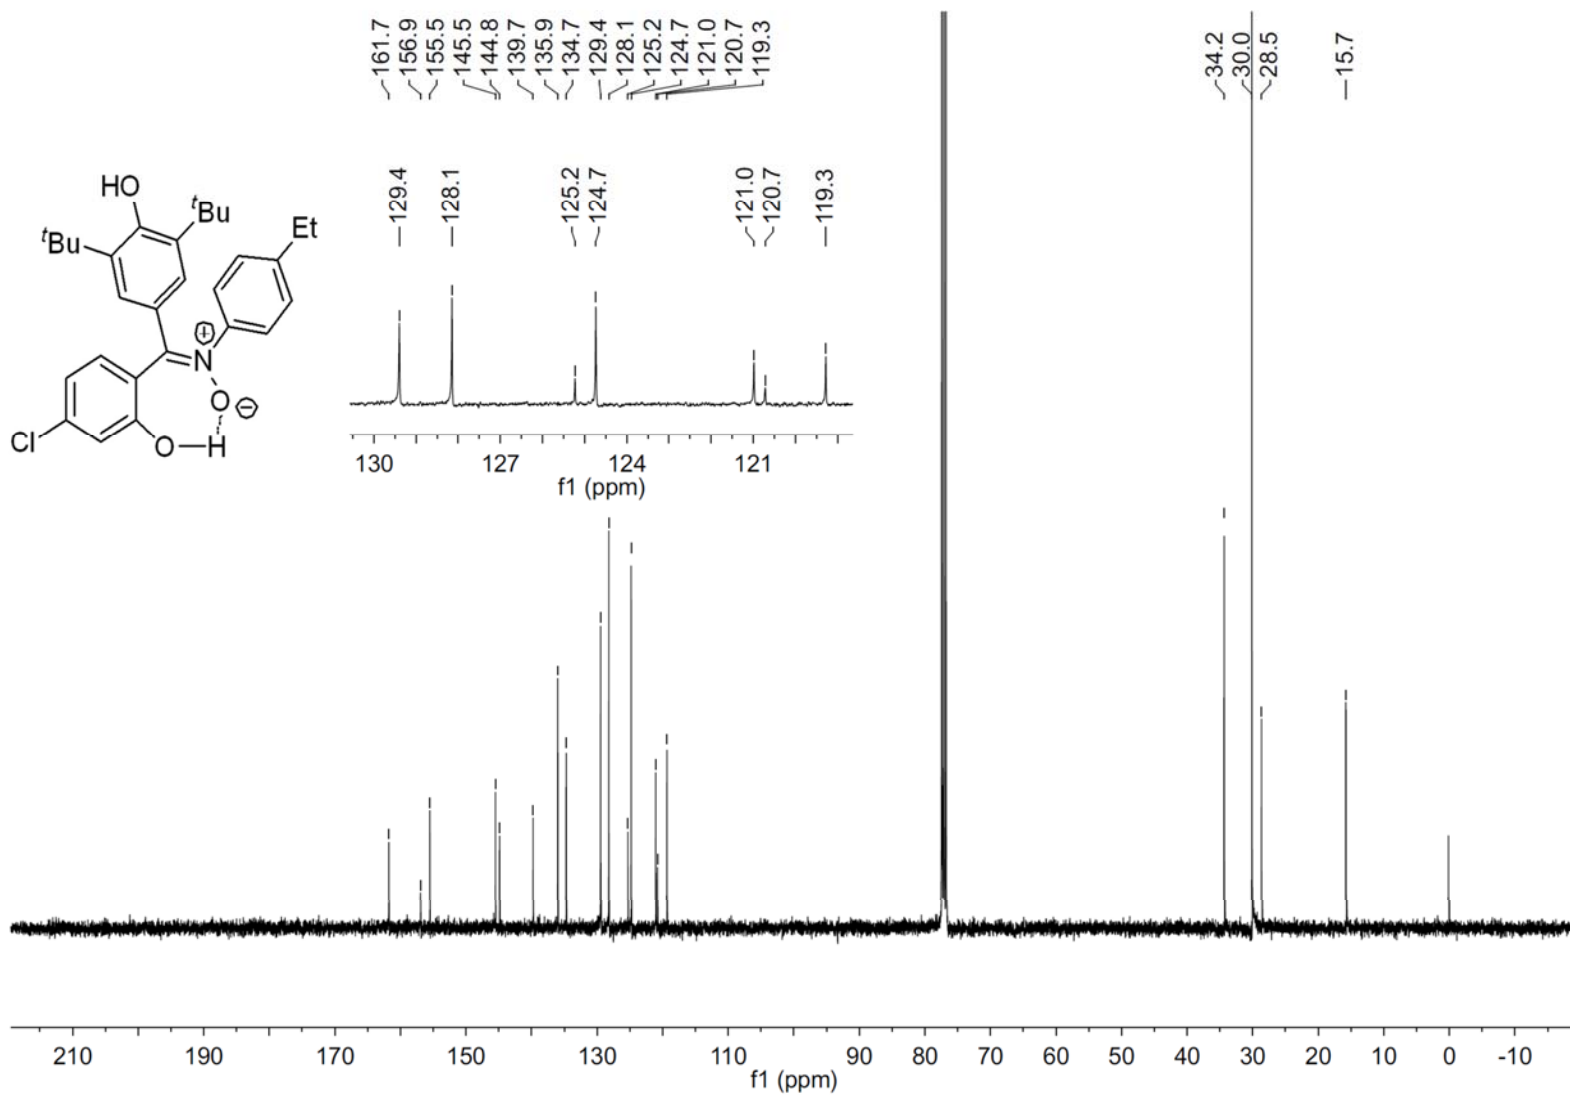

$^{13}\text{C}$  NMR Spectrum of Compound 3y

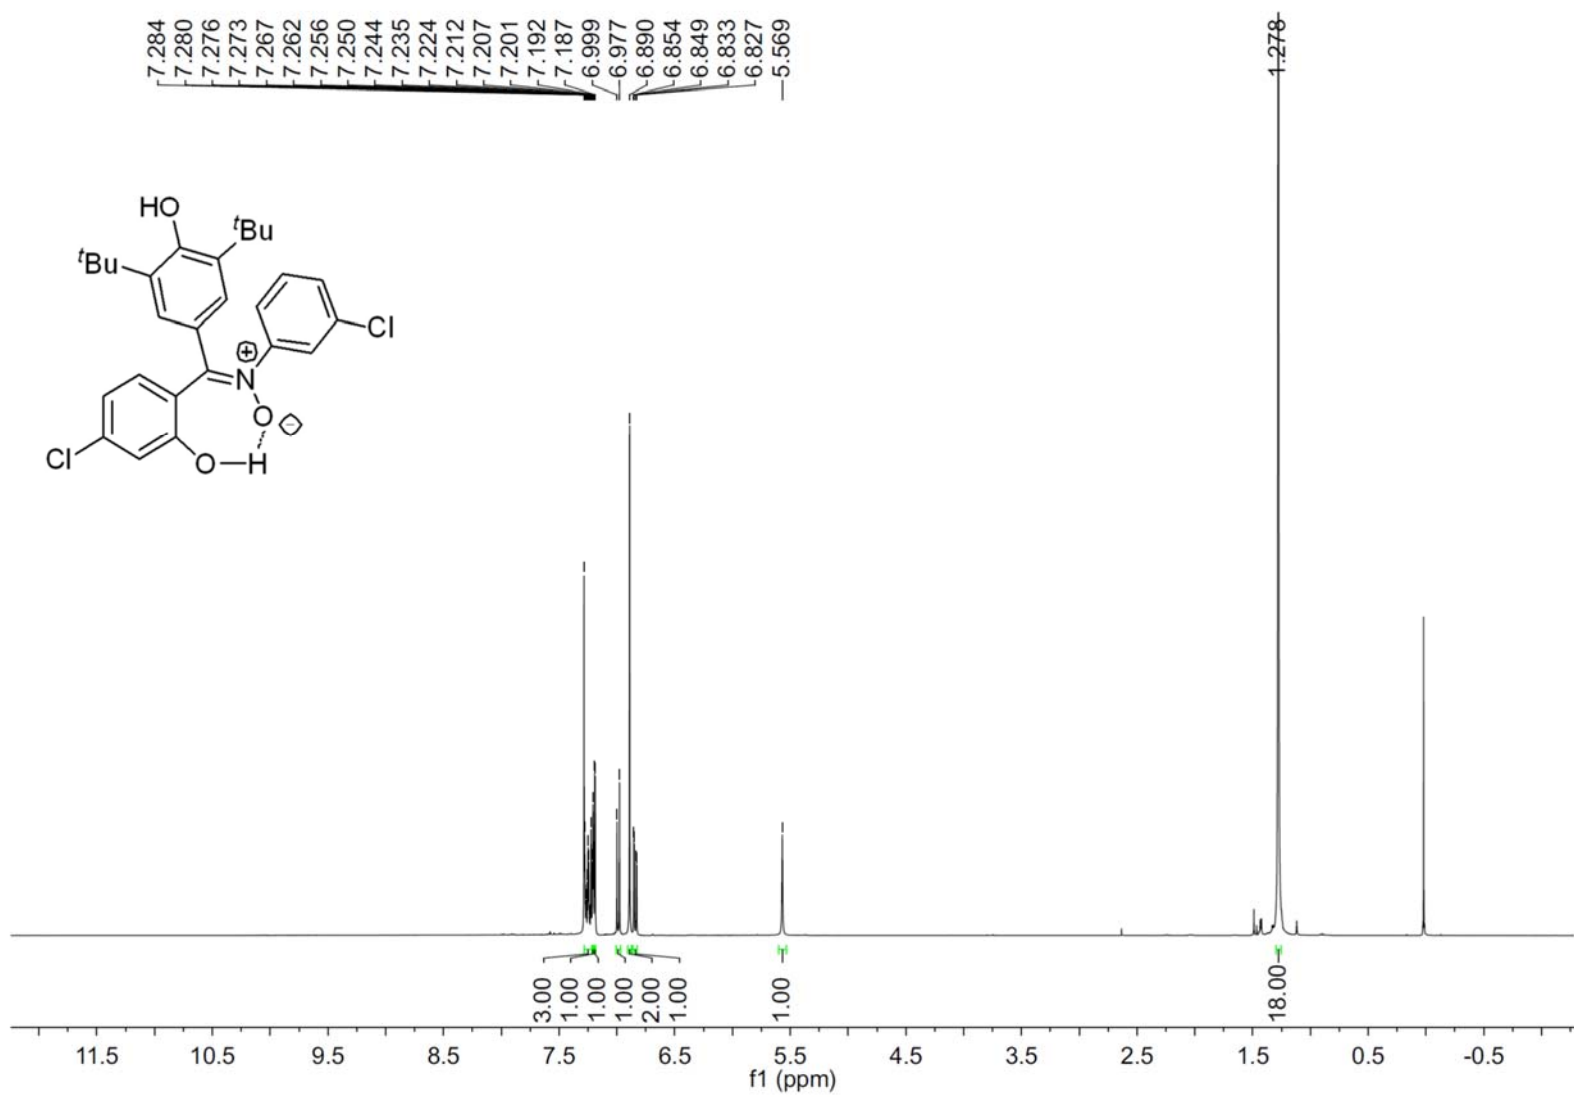

<sup>1</sup>H NMR Spectrum of Compound 3z

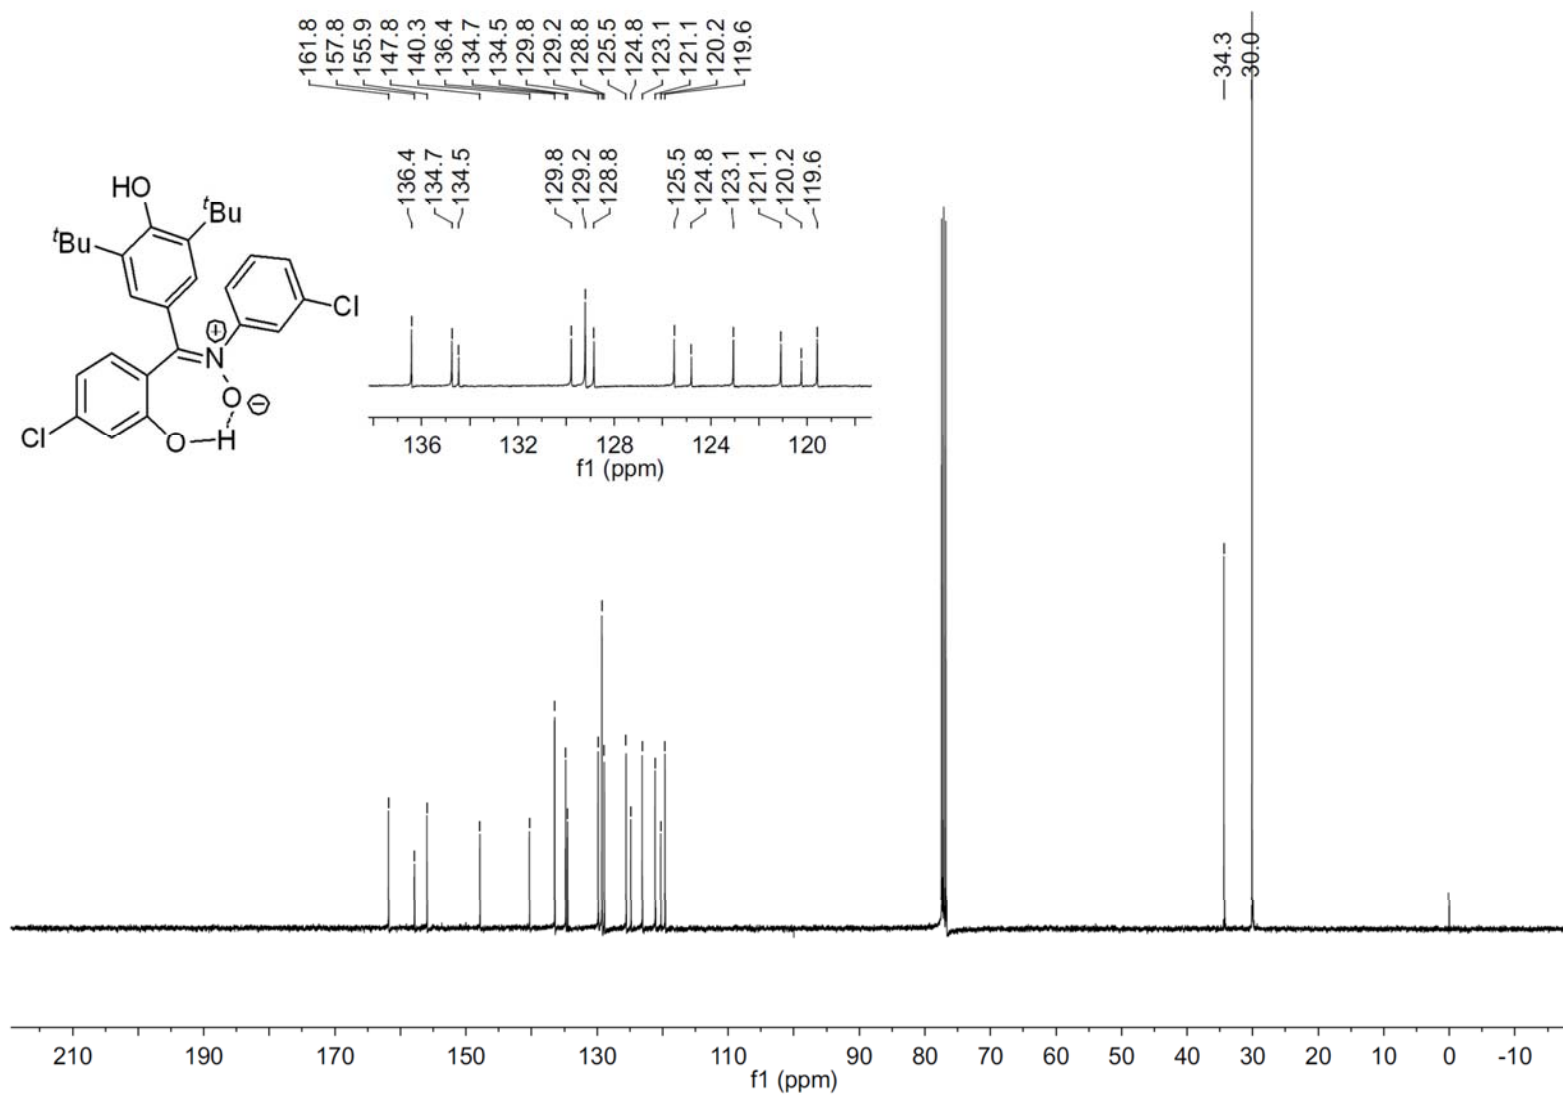

**<sup>13</sup>C NMR Spectrum of Compound 3z**

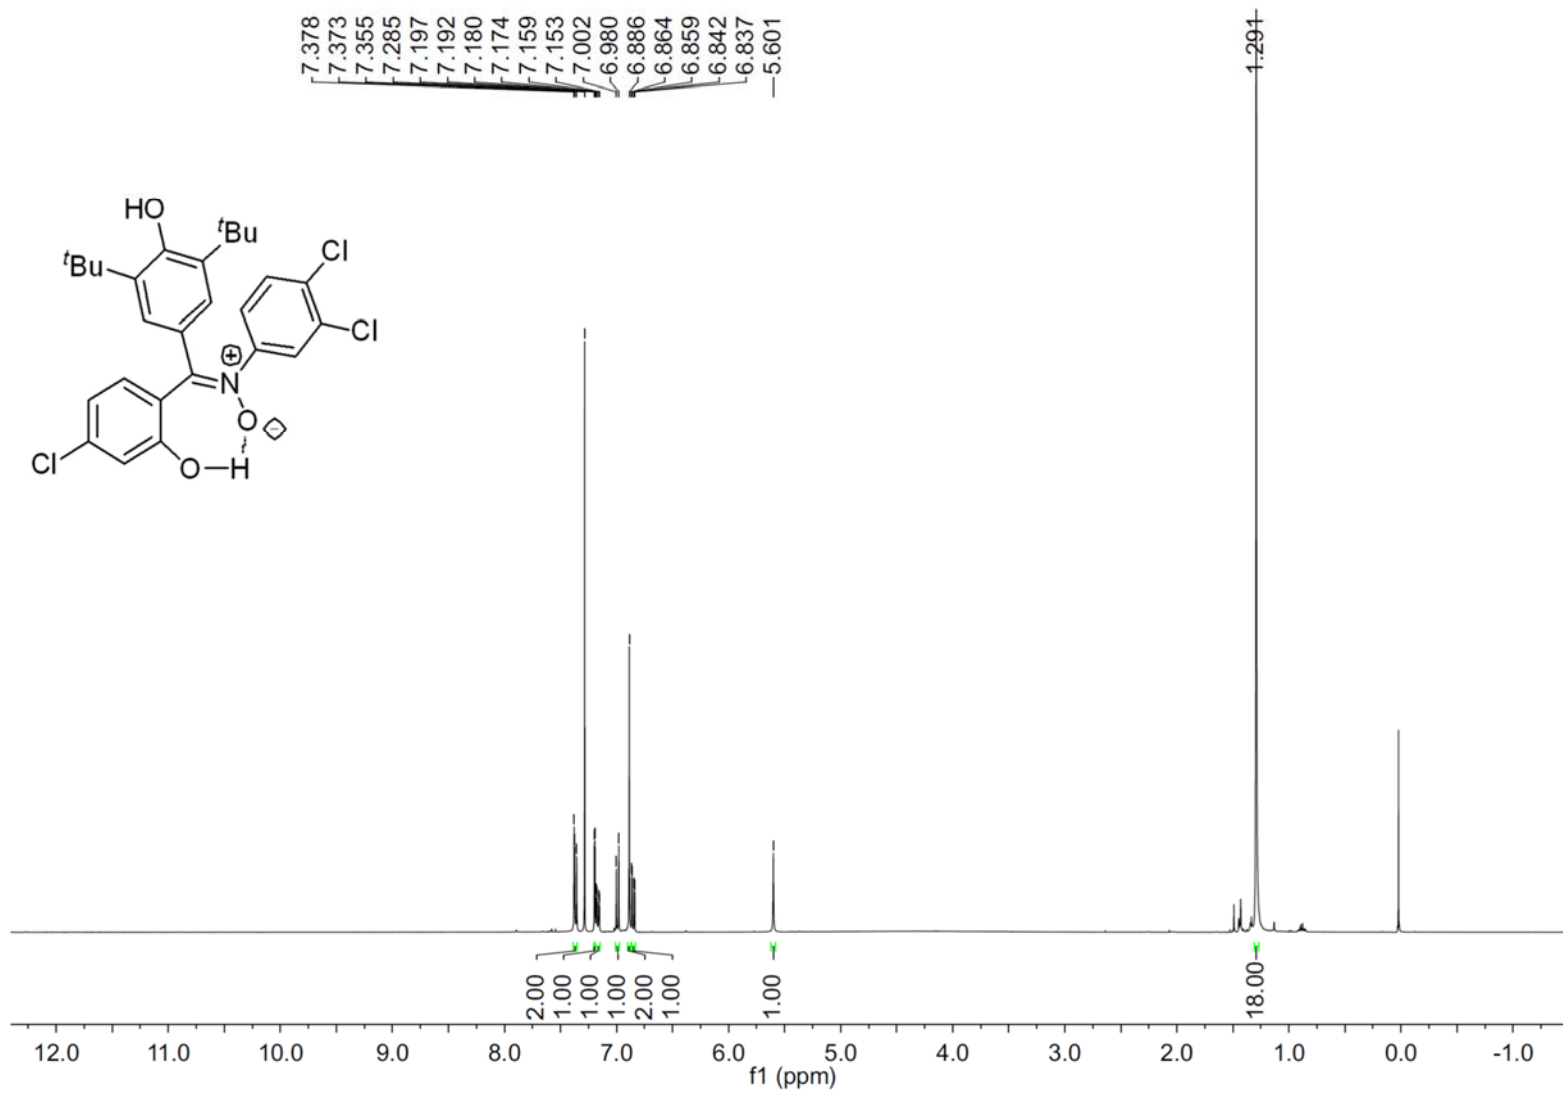

**<sup>1</sup>H NMR Spectrum of Compound 3aa**

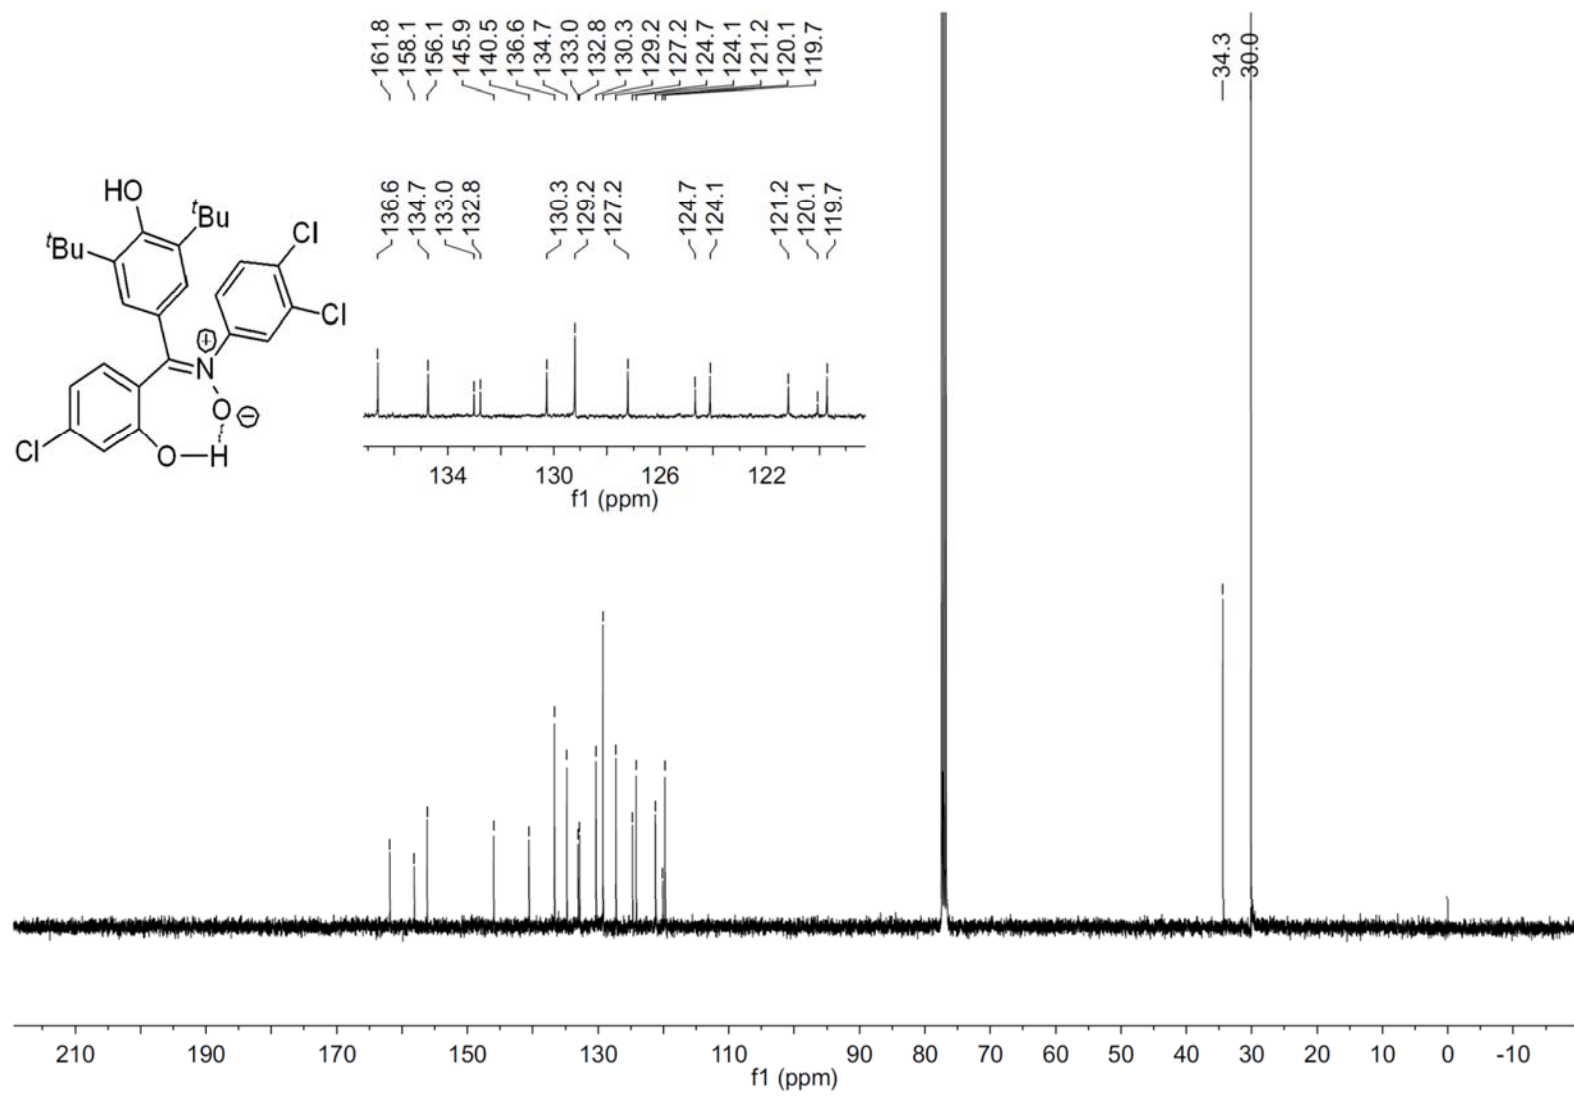

<sup>13</sup>C NMR Spectrum of Compound 3aa



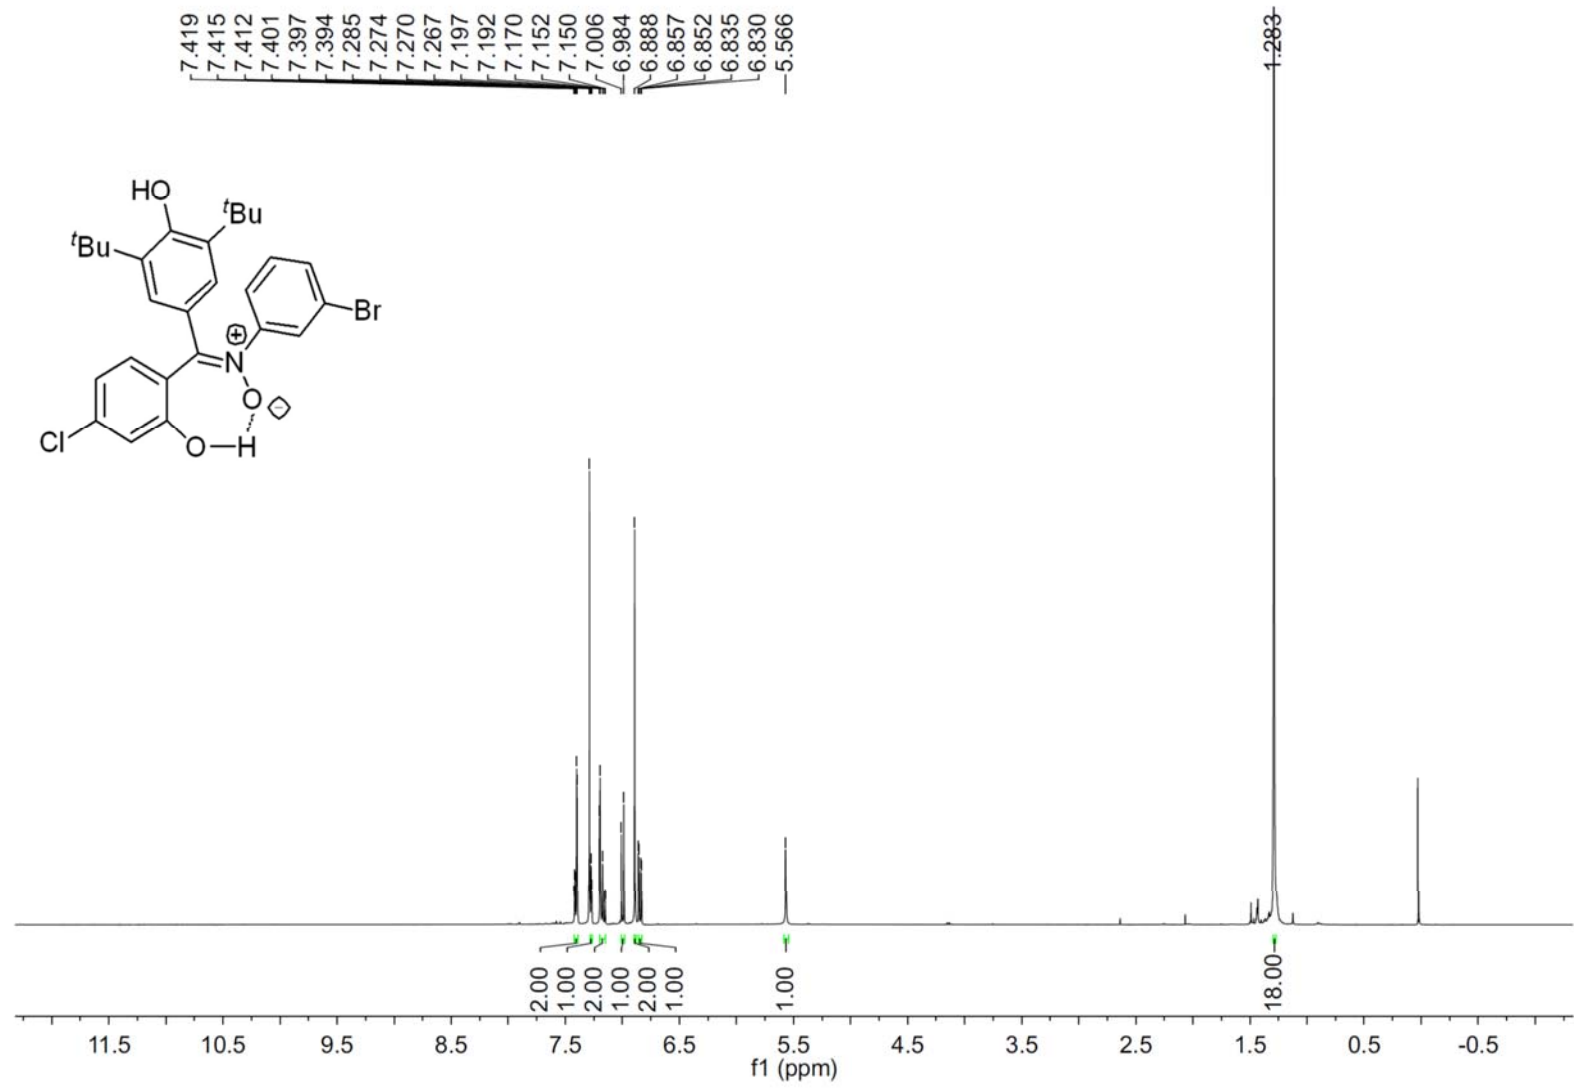

<sup>1</sup>H NMR Spectrum of Compound 3bb

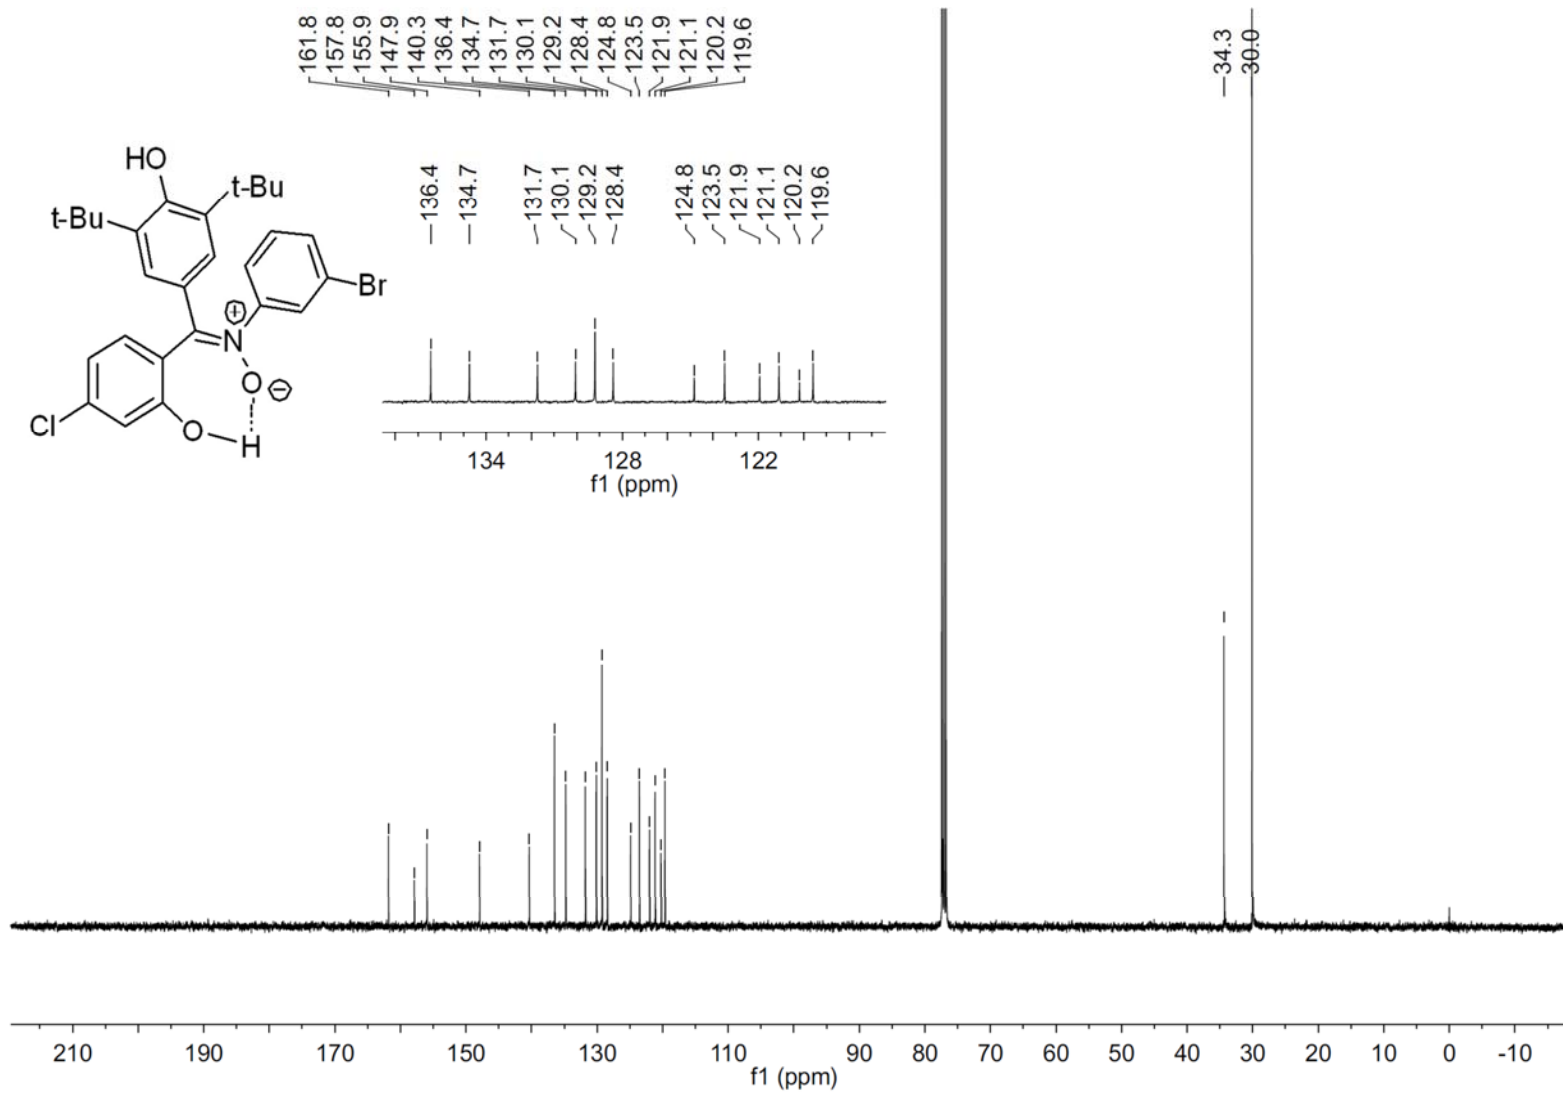

**<sup>13</sup>C NMR Spectrum of Compound 3bb**

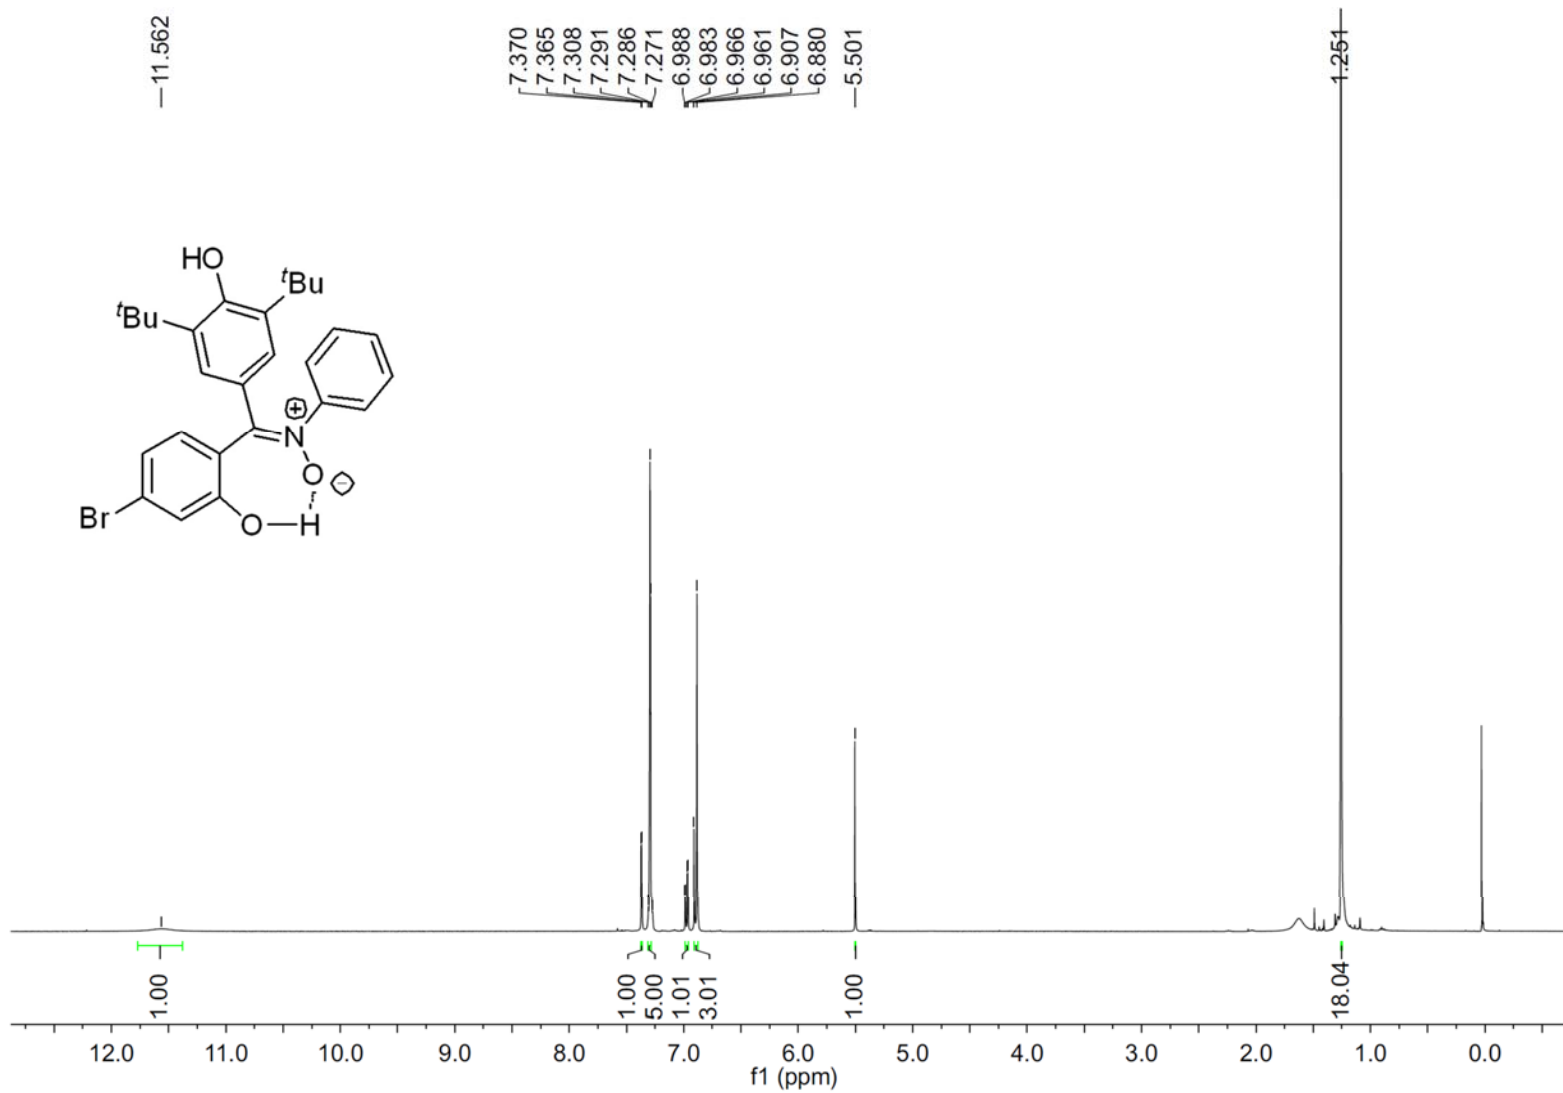

<sup>1</sup>H NMR Spectrum of Compound 3cc

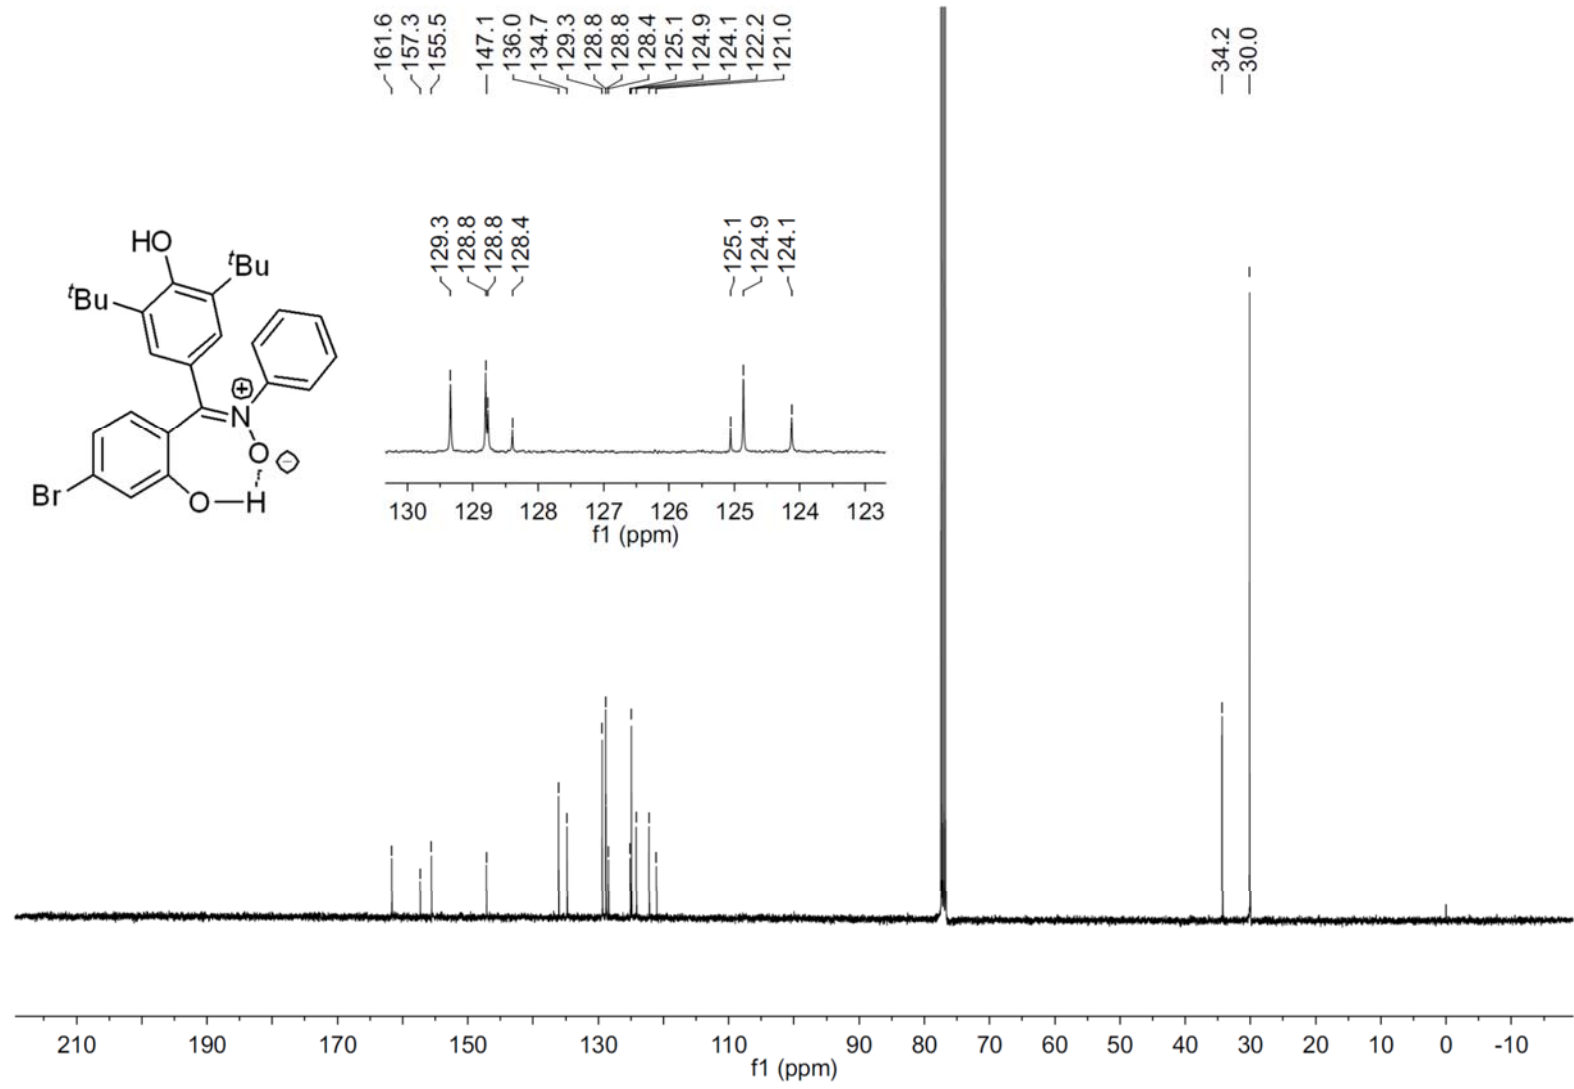

$^{13}\text{C}$  NMR Spectrum of Compound 3cc

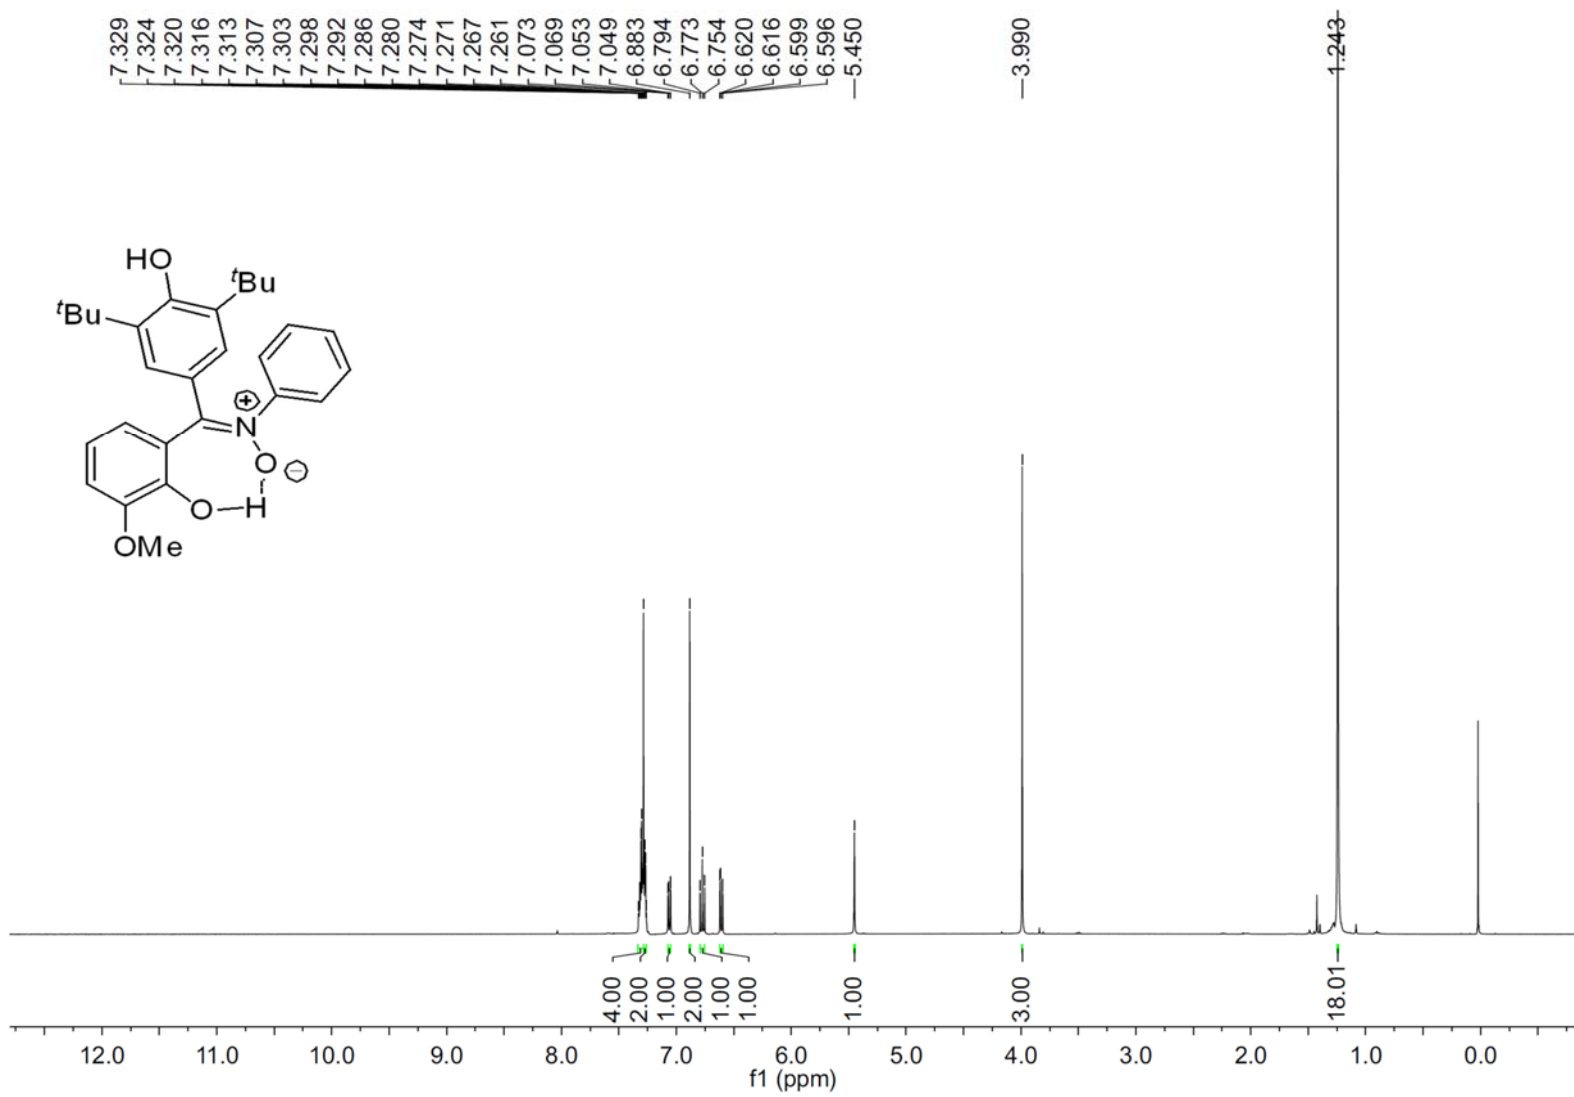

**<sup>1</sup>H NMR Spectrum of Compound 3dd**

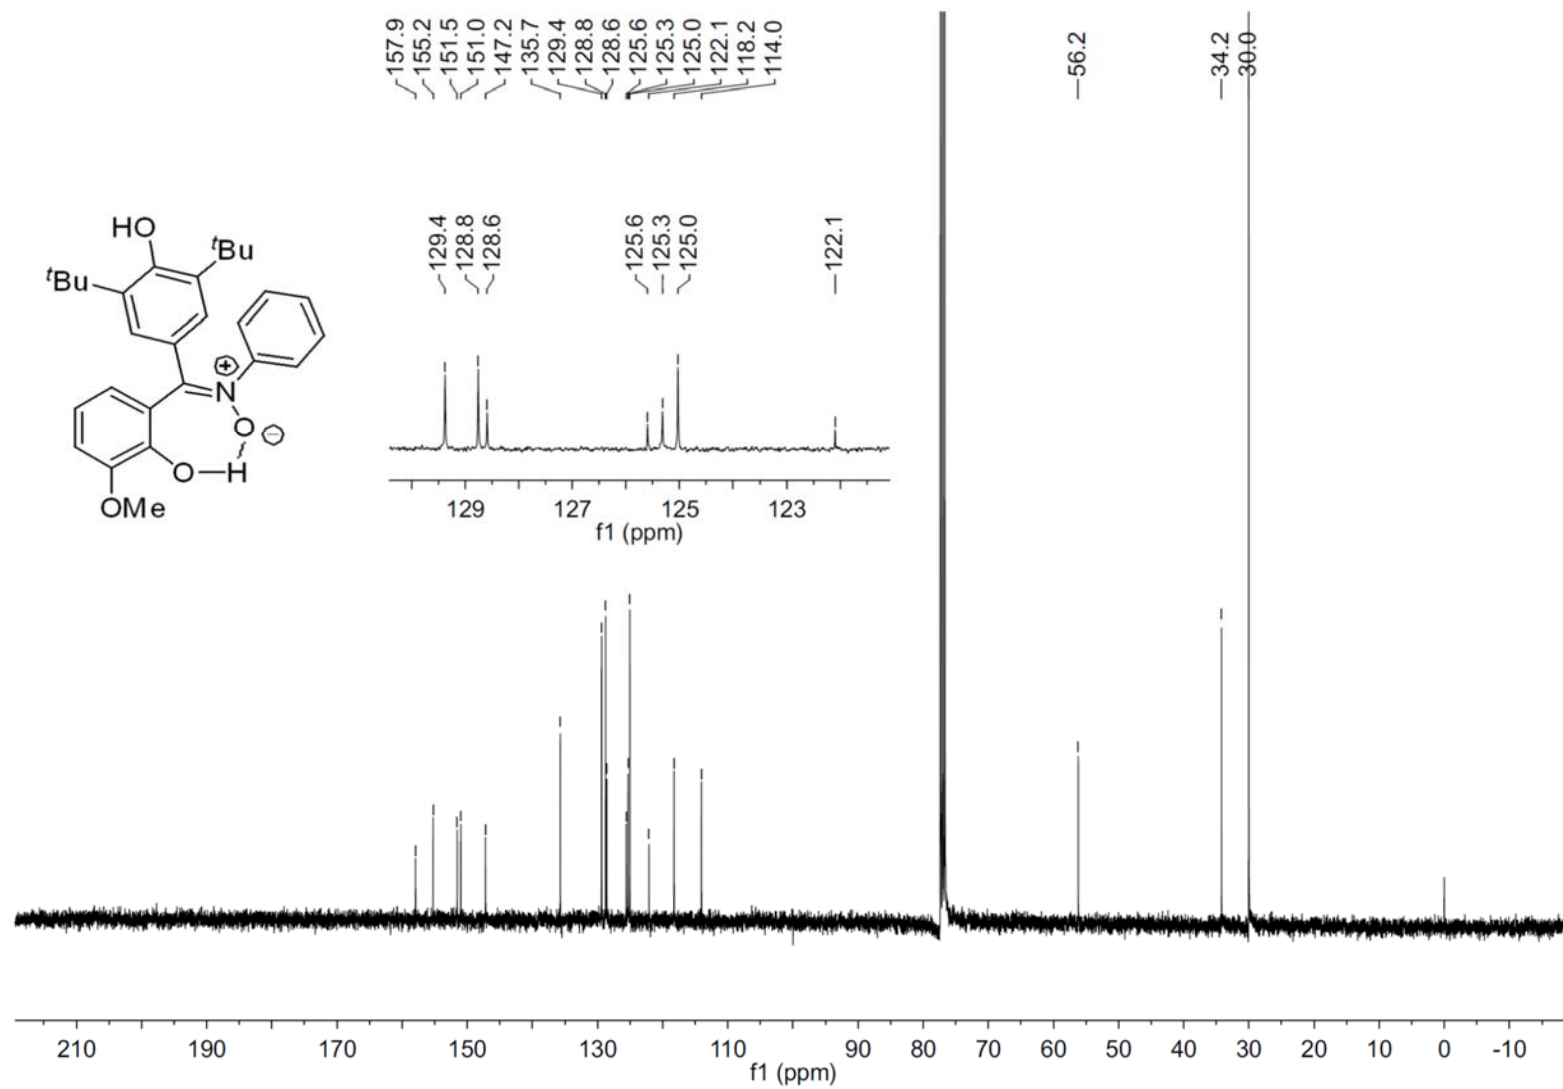

<sup>13</sup>C NMR Spectrum of Compound 3dd

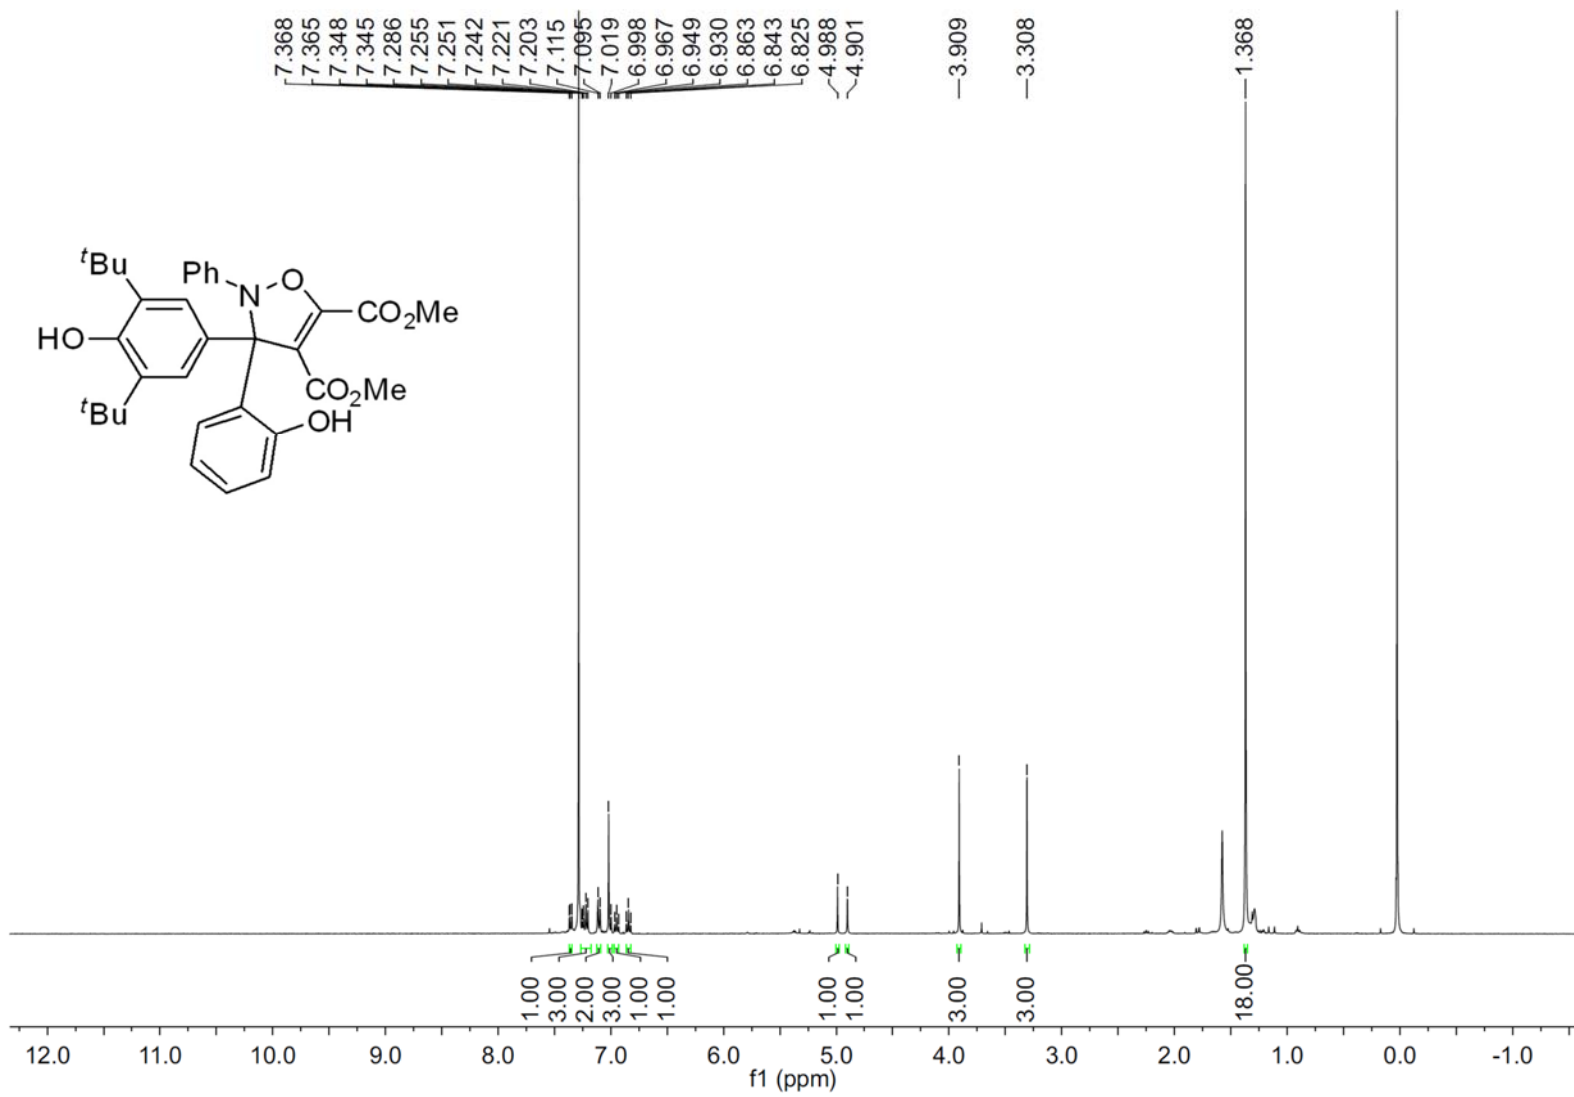

<sup>1</sup>H NMR Spectrum of Compound 5a

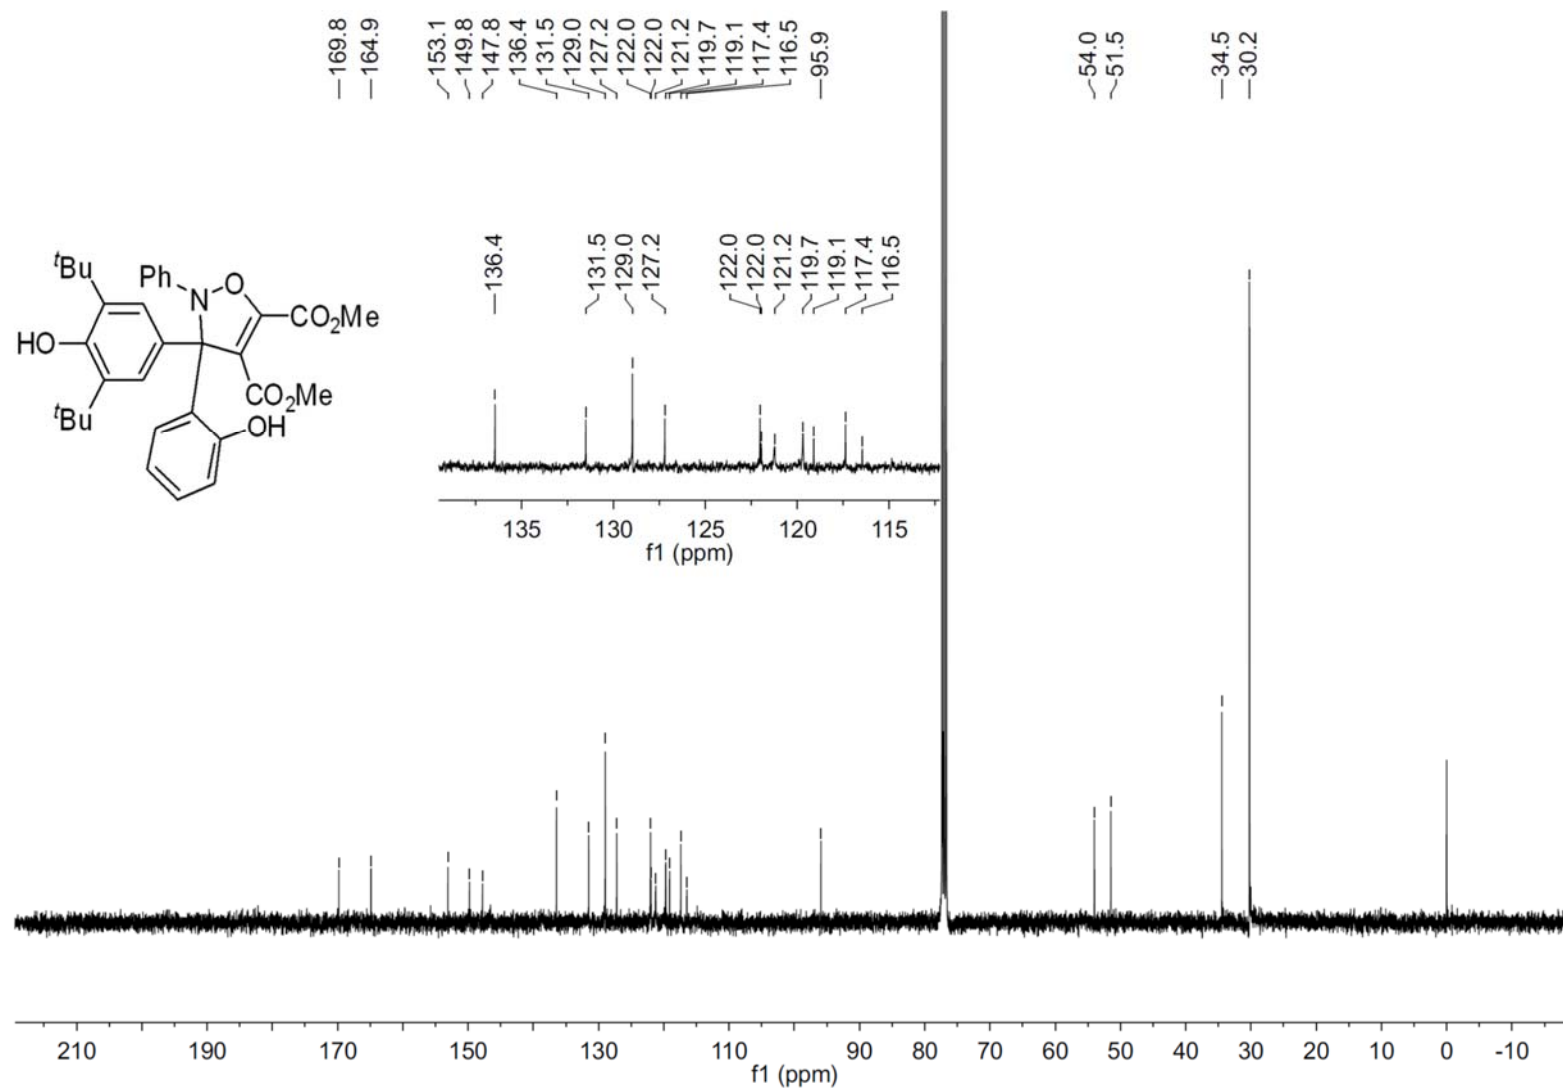

<sup>13</sup>C NMR Spectrum of Compound 5a



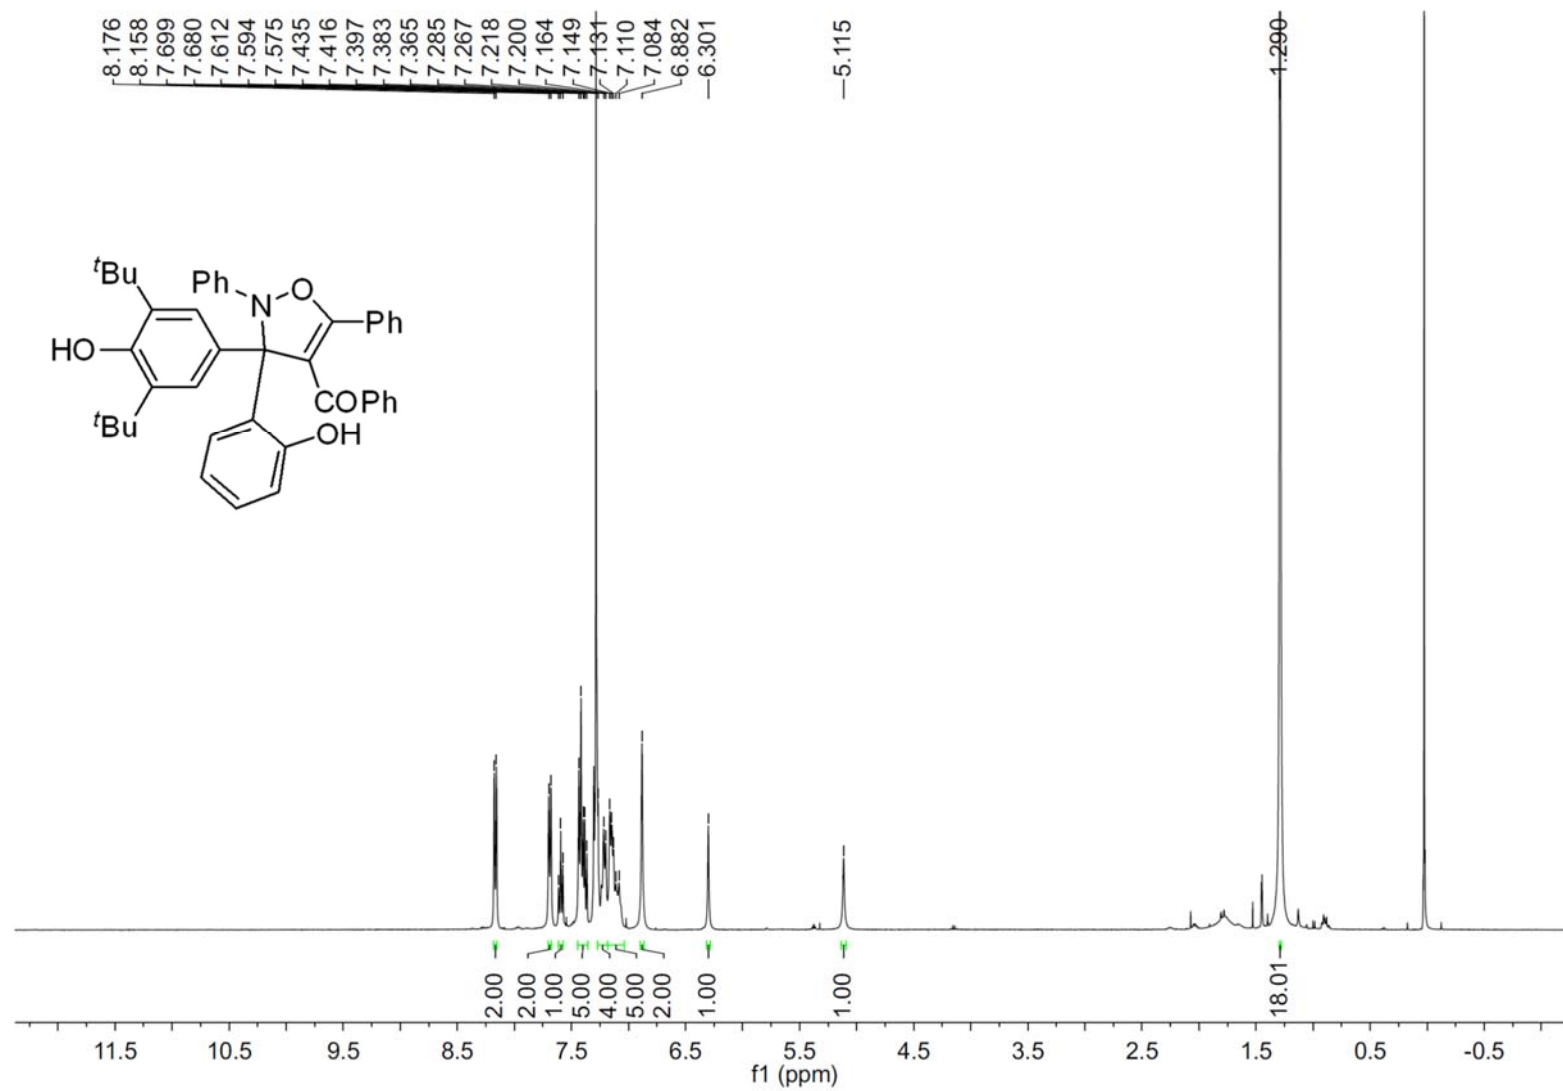

**<sup>1</sup>H NMR Spectrum of Compound 6a**

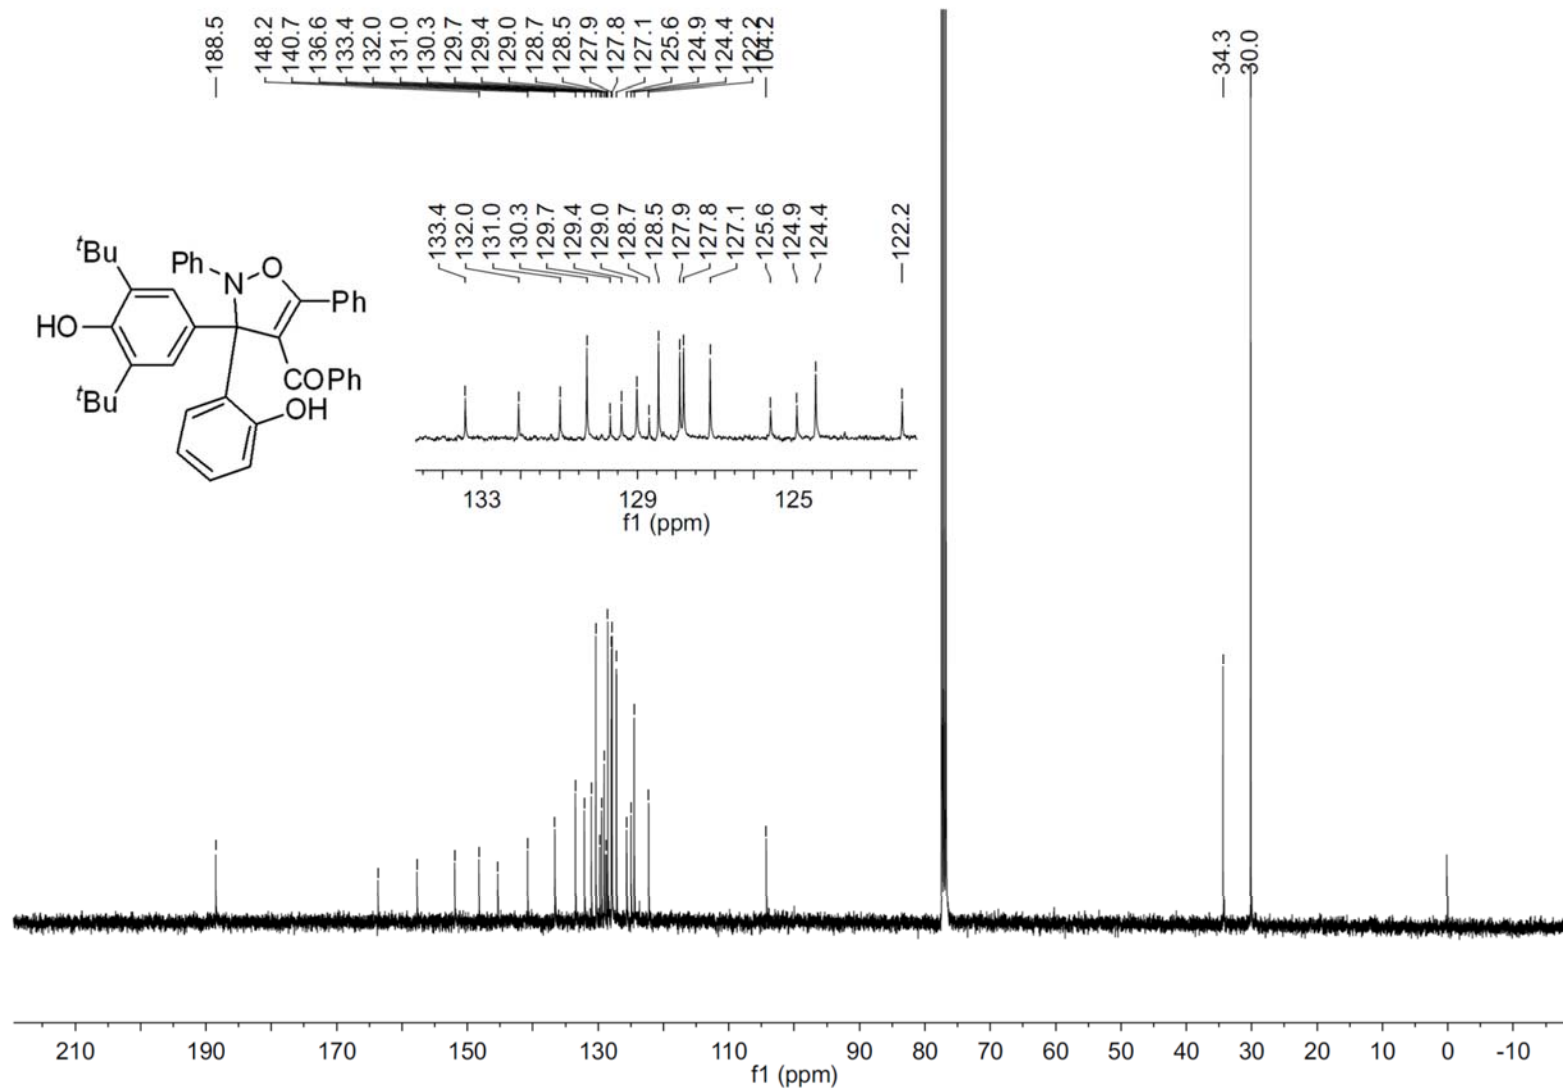

**<sup>13</sup>C NMR Spectrum of Compound 6a**
